# Supplementary material for: Identification of Differentially Expressed miRNAs in Porcine Adipose Tissues and Evaluation of Their Effects on Feed Efficiency
Source: MDPI journal article supplement (doi:10.3390/genes13122406), 2022-12-19

**Figure S1. Length distribution of the miRNA in high-FE and low-FE pig adipose libraries.**

This figure show the percentage distribution of the read lengths against the total counts in the miRNA reads of High-FE and Low-FE pig adipose libraries .

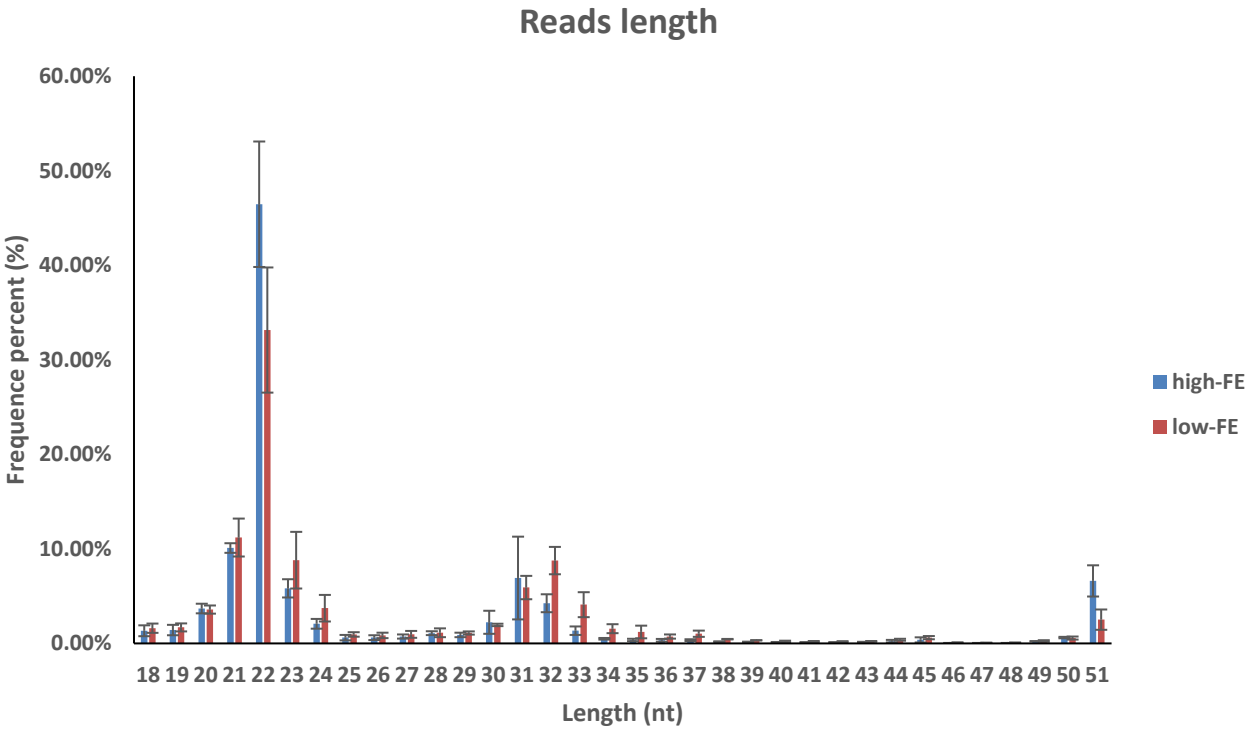

Supplement: s1 [file s1]
