# Supplementary material for: Identification of Differentially Expressed miRNAs in Porcine Adipose Tissues and Evaluation of Their Effects on Feed Efficiency
Source: Genes (Basel). 2022 Dec 19;13(12):2406. doi: 10.3390/genes13122406 (PMC9778086; doi:10.3390/genes13122406)
Supplement: Supplementary file 1 [file genes-13-02406-s001.zip]

Archive with 7 entries (7 files):
- Figure S1.pdf
- Table S1 Statics and analyses of high and low FE individuals.xlsx
- Table S2 QPCR primers used in the validation of miRNAs of adipose tissues between high and low FE Yorkshire pigs.xls
- Table S3 Potential target genes of differentially expressed miRNAs predicted by miRPath.xls
- Table S4 GO analysis for genes targeted by DE miRNAs between adipose tissues from high and low FE Yorkshire pigs.xls
- Table S5 KEGG pathways significantly related with genes targeted by DE miRNAs between adipose tissues from high and low FE Yorkshire pigs.xls
- Table S6 List of adipose tissues DEGs between Yorkshire pigs with high (n=3) and low FE (n=3).xls
