# Supplementary material for: Identification of Differentially Expressed miRNAs in Porcine Adipose Tissues and Evaluation of Their Effects on Feed Efficiency
Source: Genes (Basel). 2022 Dec 19;13(12):2406. doi: 10.3390/genes13122406 (PMC9778086; doi:10.3390/genes13122406)
Supplement: Supplementary file 1 [file genes-13-02406-s001.zip › Table S1 Statics and analyses of high and low FE individuals.xlsx]

## Sheet: Sheet1
Title
Identification of differentially expressed miRNAs in porcine adipose tissues and evaluation of their effects on feed efficiency
Authors
Mingxing Liao, Zhuqing Ren*, Yuanxin miao *
* the corresponding author
Table S1 Animal performance of Yorkshire pigs used for miRNA sequencing
Group	sample	FCR	RFI	Testing Days	DFI	ADG	Initial BW	Final BW	TBG	AMBW	ABF(mm)	LMA (cm2)	IMF
high-FE	1	1.9402	-0.535718	47	1.82049	0.938298	46.1	90.2	44.1	23.6404	18.9667	49.896	0.0210527
	2	2.35	-0.23	54	1.92635	0.82	42.1	86.4	44.3	22.61	20.83	48.68	1.67%%
	3	2.25808	-0.253732	51	1.98357	0.878431	43.2	88	44.8	22.9649	20.24	48.51	0.0256173
low-FE	1	2.66	0.21	61	2.56697	0.96	42.2	91	48.8	21.82	22.21	50.19	3.13%%
	2	2.8861	0.399724	56	2.77271	0.960714	38.2	92	53.8	22.7931	22.7533	34.874	0.0306743
	3	2.82293	0.211183	56	2.39445	0.848214	41.5	89	47.5	22.8612	22.1733	53.9	0.0321719
p-value		0.0126757	0.00626628	0.0559804	0.00499941	0.433238	0.13872	0.155363	0.0433996	0.268581	0.0151731	0.667014	0.0780152
DFI - daily feed intake. ADG - average daily gain over the assessed feeding period. BW - body weight. TBG - total body weight gain (Kg) during the assessed feeding period. ABF - average of back fat thicknesses (mm) measured at three points between 6th and 7th ribs (6th–7th BF) and at the10th rib (10th BF). LMA - loin muscle area (cm2) measured between the 10th and 11th. IMF - intramuscular fat, p…
