# Supplementary material for: Identification of Differentially Expressed miRNAs in Porcine Adipose Tissues and Evaluation of Their Effects on Feed Efficiency
Source: Genes (Basel). 2022 Dec 19;13(12):2406. doi: 10.3390/genes13122406 (PMC9778086; doi:10.3390/genes13122406)
Supplement: Supplementary file 1 [file genes-13-02406-s001.zip › Table S2 QPCR primers used in the validation of miRNAs of adipose tissues between high and low FE Yorkshire pigs.xls]

## Sheet: Sheet1
Title
Identification of differentially expressed miRNAs in porcine adipose tissues and evaluation of their effects on feed efficiency
Authors
Mingxing Liao, Zhuqing Ren*, Yuanxin miao *
* the corresponding author
Table S2 QPCR Primers used in the validation of miRNAs of adipose tissues between high and low FE Yorkshire pigs
miRNA	RT primer	Forward primer	Reverse primer
ssc-miR-122-5p	GTCGTATCCAGTGCAGGGTCCGAGGTATTCGCACTGGATACGACAAACACCA	TGGTTGTGGAGTGTGACAATGG	GTGCAGGGTCCGAGGT
ssc-miR-192	GTCGTATCCAGTGCAGGGTCCGAGGTATTCGCACTGGATACGACCTGGCTGT	TGGTTGCTGACCTATGAATTGA	GTGCAGGGTCCGAGGT
ssc-miR-155-5p	GTCGTATCCAGTGCAGGGTCCGAGGTATTCGCACTGGATACGACACCCCTAT	TGGTTGTTAATGCTAATTGTGA	GTGCAGGGTCCGAGGT
ssc-miR-150	GTCGTATCCAGTGCAGGGTCCGAGGTATTCGCACTGGATACGACCACTGGTA	TGGTTGTCTCCCAACCCTTGTA	GTGCAGGGTCCGAGGT
ssc-miR-9	GTCGTATCCAGTGCAGGGTCCGAGGTATTCGCACTGGATACGACTCATACAG	TGGTTGTCTTTGGTTATCTAGC	GTGCAGGGTCCGAGGT
U6	CTTCACGAATTTGCGTGTCAT	GCTTCGGCAGCACATATACT	CTTCACGAATTTGCGTGTCAT
