# Supplementary material for: Identification of Differentially Expressed miRNAs in Porcine Adipose Tissues and Evaluation of Their Effects on Feed Efficiency
Source: Genes (Basel). 2022 Dec 19;13(12):2406. doi: 10.3390/genes13122406 (PMC9778086; doi:10.3390/genes13122406)
Supplement: Supplementary file 1 [file genes-13-02406-s001.zip › Table S3 Potential target genes of differentially expressed miRNAs predicted by miRPath.xls]

## Sheet: Sheet1
Title
Identification of differentially expressed miRNAs in porcine adipose tissues and evaluation of their effects on feed efficiency
Authors
Mingxing Liao, Zhuqing Ren*, Yuanxin miao *
* the corresponding author
Table S3 Potential target genes of differentially expressed miRNAs predicted by miRPath
miRNAs	Gene Name	Gene Ensembl id
hsa-miR-122-5p	AHI1	ENSG00000135541
hsa-miR-122-5p	CALU	ENSG00000128595
hsa-miR-122-5p	TGDS	ENSG00000088451
hsa-miR-122-5p	CCNT2	ENSG00000082258
hsa-miR-122-5p	VAPB	ENSG00000124164
hsa-miR-122-5p	OSBP2	ENSG00000184792
hsa-miR-122-5p	ZNF713	ENSG00000178665
hsa-miR-122-5p	B2M	ENSG00000166710
hsa-miR-122-5p	PIK3C3	ENSG00000078142
hsa-miR-122-5p	TBC1D20	ENSG00000125875
hsa-miR-122-5p	PELI1	ENSG00000197329
hsa-miR-122-5p	PLXNA2	ENSG00000076356
hsa-miR-122-5p	VPS13C	ENSG00000129003
hsa-miR-122-5p	ATF6	ENSG00000118217
hsa-miR-122-5p	SLC2A14	ENSG00000173262
hsa-miR-122-5p	ZBTB40	ENSG00000184677
hsa-miR-122-5p	FAM161A	ENSG00000170264
hsa-miR-122-5p	POU2F1	ENSG00000143190
hsa-miR-122-5p	RMND1	ENSG00000155906
hsa-miR-122-5p	ACTB	ENSG00000075624
hsa-miR-122-5p	NA	ENSG00000215386
hsa-miR-122-5p	CCNG1	ENSG00000113328
hsa-miR-122-5p	DUSP4	ENSG00000120875
hsa-miR-122-5p	CCDC144A	ENSG00000266302
hsa-miR-122-5p	BRI3BP	ENSG00000184992
hsa-miR-122-5p	XXYLT1	ENSG00000173950
hsa-miR-122-5p	MSI2	ENSG00000153944
hsa-miR-122-5p	PSPH	ENSG00000146733
hsa-miR-122-5p	MED29	ENSG00000063322
hsa-miR-122-5p	ACKR3	ENSG00000144476
hsa-miR-122-5p	ZEB2	ENSG00000169554
hsa-miR-122-5p	ERAP1	ENSG00000164307
hsa-miR-122-5p	JARID2	ENSG00000008083
hsa-miR-122-5p	C19orf40	ENSG00000131944
hsa-miR-122-5p	NFE2L3	ENSG00000050344
hsa-miR-122-5p	HIPK2	ENSG00000064393
hsa-miR-122-5p	MSLN	ENSG00000102854
hsa-miR-122-5p	BTN3A1	ENSG00000026950
hsa-miR-122-5p	TNS1	ENSG00000079308
hsa-miR-122-5p	ASB7	ENSG00000183475
hsa-miR-122-5p	RBM25	ENSG00000119707
hsa-miR-122-5p	SOX4	ENSG00000124766
hsa-miR-122-5p	FBXL3	ENSG00000005812
hsa-miR-122-5p	FBXO11	ENSG00000138081
hsa-miR-122-5p	PKIA	ENSG00000171033
hsa-miR-122-5p	PHKA2	ENSG00000044446
hsa-miR-122-5p	CHST12	ENSG00000136213
hsa-miR-122-5p	URGCP	ENSG00000106608
hsa-miR-122-5p	ITPRIP	ENSG00000148841
hsa-miR-122-5p	ZNF786	ENSG00000197362
hsa-miR-122-5p	TSC1	ENSG00000165699
hsa-miR-122-5p	NFKBIZ	ENSG00000144802
hsa-miR-122-5p	TP53RK	ENSG00000172315
hsa-miR-122-5p	APMAP	ENSG00000101474
hsa-miR-122-5p	RBM27	ENSG00000091009
hsa-miR-122-5p	MPV17	ENSG00000115204
hsa-miR-122-5p	DNAJC22	ENSG00000178401
hsa-miR-122-5p	RREB1	ENSG00000124782
hsa-miR-122-5p	SFXN4	ENSG00000183605
hsa-miR-122-5p	TNPO1	ENSG00000083312
hsa-miR-122-5p	ARGLU1	ENSG00000134884
hsa-miR-122-5p	DIP2A	ENSG00000160305
hsa-miR-122-5p	UBE2Z	ENSG00000159202
hsa-miR-122-5p	GLG1	ENSG00000090863
hsa-miR-122-5p	POMZP3	ENSG00000146707
hsa-miR-122-5p	TOB2	ENSG00000183864
hsa-miR-122-5p	G3BP1	ENSG00000145907
hsa-miR-122-5p	E2F1	ENSG00000101412
hsa-miR-122-5p	RAB3GAP2	ENSG00000118873
hsa-miR-122-5p	ZNF638	ENSG00000075292
hsa-miR-122-5p	EID2B	ENSG00000176401
hsa-miR-122-5p	AKIP1	ENSG00000166452
hsa-miR-122-5p	TGFBR1	ENSG00000106799
hsa-miR-122-5p	YIPF3	ENSG00000137207
hsa-miR-122-5p	CYP1A2	ENSG00000140505
hsa-miR-122-5p	RTTN	ENSG00000176225
hsa-miR-122-5p	PRG4	ENSG00000116690
hsa-miR-122-5p	KIAA1731	ENSG00000166004
hsa-miR-122-5p	CHST3	ENSG00000122863
hsa-miR-122-5p	ANKRD13A	ENSG00000076513
hsa-miR-122-5p	ST6GALNAC4	ENSG00000136840
hsa-miR-122-5p	CEP152	ENSG00000103995
hsa-miR-122-5p	EXT1	ENSG00000182197
hsa-miR-122-5p	MANEA	ENSG00000172469
hsa-miR-122-5p	ATP6V0E1	ENSG00000113732
hsa-miR-122-5p	FSTL3	ENSG00000070404
hsa-miR-122-5p	MFSD1	ENSG00000118855
hsa-miR-122-5p	WASF1	ENSG00000112290
hsa-miR-122-5p	MAP2	ENSG00000078018
hsa-miR-122-5p	SENP3	ENSG00000161956
hsa-miR-122-5p	ZNF273	ENSG00000198039
hsa-miR-122-5p	POPDC3	ENSG00000132429
hsa-miR-122-5p	USP53	ENSG00000145390
hsa-miR-122-5p	MYB	ENSG00000118513
hsa-miR-122-5p	ID2	ENSG00000115738
hsa-miR-122-5p	PHF20L1	ENSG00000129292
hsa-miR-122-5p	ITGB1	ENSG00000150093
hsa-miR-122-5p	ZNF274	ENSG00000171606
hsa-miR-122-5p	PTMA	ENSG00000187514
hsa-miR-122-5p	HOXC9	ENSG00000180806
hsa-miR-122-5p	MED13L	ENSG00000123066
hsa-miR-122-5p	PLCXD1	ENSG00000182378
hsa-miR-122-5p	LPPR4	ENSG00000117600
hsa-miR-122-5p	CEP97	ENSG00000182504
hsa-miR-122-5p	NUMBL	ENSG00000105245
hsa-miR-122-5p	NUCB2	ENSG00000070081
hsa-miR-122-5p	IL1R1	ENSG00000115594
hsa-miR-122-5p	ST3GAL3	ENSG00000126091
hsa-miR-122-5p	AIPL1	ENSG00000129221
hsa-miR-122-5p	C9orf84	ENSG00000165181
hsa-miR-122-5p	ANGEL2	ENSG00000174606
hsa-miR-122-5p	SOS2	ENSG00000100485
hsa-miR-122-5p	ZNF827	ENSG00000151612
hsa-miR-122-5p	LCA5	ENSG00000135338
hsa-miR-122-5p	PGAP1	ENSG00000197121
hsa-miR-122-5p	NUP85	ENSG00000125450
hsa-miR-122-5p	L1CAM	ENSG00000198910
hsa-miR-122-5p	SNHG5	ENSG00000203875
hsa-miR-122-5p	FUS	ENSG00000089280
hsa-miR-122-5p	NA	ENSG00000130600
hsa-miR-122-5p	ITGB8	ENSG00000105855
hsa-miR-122-5p	PCSK6	ENSG00000140479
hsa-miR-122-5p	CADM2	ENSG00000175161
hsa-miR-122-5p	CDK4	ENSG00000135446
hsa-miR-122-5p	LAMB1	ENSG00000091136
hsa-miR-122-5p	FKBP11	ENSG00000134285
hsa-miR-122-5p	DDX50	ENSG00000107625
hsa-miR-122-5p	YIPF2	ENSG00000130733
hsa-miR-122-5p	RDH11	ENSG00000072042
hsa-miR-122-5p	RIOK3	ENSG00000101782
hsa-miR-122-5p	SPN	ENSG00000197471
hsa-miR-122-5p	SCD5	ENSG00000145284
hsa-miR-122-5p	KCTD12	ENSG00000178695
hsa-miR-122-5p	NOTCH2NL	ENSG00000213240
hsa-miR-122-5p	ZNF12	ENSG00000164631
hsa-miR-122-5p	HAUS2	ENSG00000137814
hsa-miR-122-5p	SMAD2	ENSG00000175387
hsa-miR-122-5p	ZNF70	ENSG00000187792
hsa-miR-122-5p	CAMSAP1	ENSG00000130559
hsa-miR-122-5p	ESCO2	ENSG00000171320
hsa-miR-122-5p	ALMS1	ENSG00000116127
hsa-miR-122-5p	USP25	ENSG00000155313
hsa-miR-122-5p	ZNF611	ENSG00000213020
hsa-miR-122-5p	BRD2	ENSG00000204256
hsa-miR-122-5p	CBL	ENSG00000110395
hsa-miR-122-5p	CASP4	ENSG00000196954
hsa-miR-122-5p	INTS10	ENSG00000104613
hsa-miR-122-5p	HNRNPA1	ENSG00000135486
hsa-miR-122-5p	DICER1	ENSG00000100697
hsa-miR-122-5p	E2F2	ENSG00000007968
hsa-miR-122-5p	CASP7	ENSG00000165806
hsa-miR-122-5p	CXCR4	ENSG00000121966
hsa-miR-122-5p	TMEM102	ENSG00000181284
hsa-miR-122-5p	CBFA2T2	ENSG00000078699
hsa-miR-122-5p	ETV6	ENSG00000139083
hsa-miR-122-5p	LTN1	ENSG00000198862
hsa-miR-122-5p	NSUN4	ENSG00000117481
hsa-miR-122-5p	SCAF4	ENSG00000156304
hsa-miR-122-5p	DUSP2	ENSG00000158050
hsa-miR-122-5p	ORAI2	ENSG00000160991
hsa-miR-122-5p	ATXN2L	ENSG00000168488
hsa-miR-122-5p	ANKRD13D	ENSG00000172932
hsa-miR-122-5p	CPA3	ENSG00000163751
hsa-miR-122-5p	CNOT4	ENSG00000080802
hsa-miR-122-5p	STK4	ENSG00000101109
hsa-miR-122-5p	DNASE1L1	ENSG00000013563
hsa-miR-122-5p	SLC25A46	ENSG00000164209
hsa-miR-122-5p	NODAL	ENSG00000156574
hsa-miR-122-5p	ZNF124	ENSG00000196418
hsa-miR-122-5p	RNF207	ENSG00000158286
hsa-miR-122-5p	PIGX	ENSG00000163964
hsa-miR-122-5p	COA1	ENSG00000106603
hsa-miR-122-5p	CLIC4	ENSG00000169504
hsa-miR-122-5p	IRAK3	ENSG00000090376
hsa-miR-122-5p	TTBK2	ENSG00000128881
hsa-miR-122-5p	TGFBRAP1	ENSG00000135966
hsa-miR-122-5p	ATP5F1	ENSG00000116459
hsa-miR-122-5p	CCNL2	ENSG00000221978
hsa-miR-122-5p	MCM8	ENSG00000125885
hsa-miR-122-5p	HNRNPD	ENSG00000138668
hsa-miR-122-5p	ZNF532	ENSG00000074657
hsa-miR-122-5p	BTF3	ENSG00000145741
hsa-miR-122-5p	B3GALT6	ENSG00000176022
hsa-miR-122-5p	RAI1	ENSG00000108557
hsa-miR-122-5p	SCARA3	ENSG00000168077
hsa-miR-122-5p	TMEM144	ENSG00000164124
hsa-miR-122-5p	GARNL3	ENSG00000136895
hsa-miR-122-5p	DCAF8	ENSG00000132716
hsa-miR-122-5p	ERO1L	ENSG00000197930
hsa-miR-122-5p	ANKHD1	ENSG00000131503
hsa-miR-122-5p	DCTN5	ENSG00000166847
hsa-miR-122-5p	HNRNPA3	ENSG00000170144
hsa-miR-122-5p	NUP153	ENSG00000124789
hsa-miR-122-5p	MIER2	ENSG00000105556
hsa-miR-122-5p	UBQLN4	ENSG00000160803
hsa-miR-122-5p	AC074093.1.1	ENSG00000226674
hsa-miR-122-5p	GNAS	ENSG00000087460
hsa-miR-122-5p	PCLO	ENSG00000186472
hsa-miR-122-5p	FAM115A	ENSG00000198420
hsa-miR-122-5p	HEATR6	ENSG00000068097
hsa-miR-122-5p	C5orf42	ENSG00000197603
hsa-miR-122-5p	LAMA5	ENSG00000130702
hsa-miR-122-5p	ZNF10	ENSG00000256223
hsa-miR-122-5p	LRRC14	ENSG00000160959
hsa-miR-122-5p	BRD8	ENSG00000112983
hsa-miR-122-5p	TAF9B	ENSG00000187325
hsa-miR-122-5p	VPS13D	ENSG00000048707
hsa-miR-122-5p	ODF2L	ENSG00000122417
hsa-miR-122-5p	RHBDD3	ENSG00000100263
hsa-miR-122-5p	IQGAP3	ENSG00000183856
hsa-miR-122-5p	ORC2	ENSG00000115942
hsa-miR-122-5p	UHRF1BP1L	ENSG00000111647
hsa-miR-122-5p	ARMC8	ENSG00000114098
hsa-miR-122-5p	NLN	ENSG00000123213
hsa-miR-122-5p	RUNX1	ENSG00000159216
hsa-miR-122-5p	VANGL1	ENSG00000173218
hsa-miR-122-5p	VPS8	ENSG00000156931
hsa-miR-122-5p	C9orf174	ENSG00000197816
hsa-miR-122-5p	TCP11	ENSG00000124678
hsa-miR-122-5p	TCF25	ENSG00000141002
hsa-miR-122-5p	IL12A	ENSG00000168811
hsa-miR-122-5p	CMBL	ENSG00000164237
hsa-miR-122-5p	RORB	ENSG00000198963
hsa-miR-122-5p	PHF14	ENSG00000106443
hsa-miR-122-5p	ZNF816	ENSG00000180257
hsa-miR-122-5p	NCOA7	ENSG00000111912
hsa-miR-122-5p	GLRB	ENSG00000109738
hsa-miR-122-5p	ATMIN	ENSG00000166454
hsa-miR-122-5p	CDKAL1	ENSG00000145996
hsa-miR-122-5p	SLC25A37	ENSG00000147454
hsa-miR-122-5p	TPR	ENSG00000047410
hsa-miR-122-5p	NALCN	ENSG00000102452
hsa-miR-122-5p	IAH1	ENSG00000134330
hsa-miR-122-5p	FLRT3	ENSG00000125848
hsa-miR-122-5p	WDR41	ENSG00000164253
hsa-miR-122-5p	MTUS1	ENSG00000129422
hsa-miR-122-5p	LMNB2	ENSG00000176619
hsa-miR-122-5p	SMARCA4	ENSG00000127616
hsa-miR-122-5p	CRYZL1	ENSG00000205758
hsa-miR-122-5p	KCNN3	ENSG00000143603
hsa-miR-122-5p	CPEB4	ENSG00000113742
hsa-miR-122-5p	SP140L	ENSG00000185404
hsa-miR-122-5p	ZNF131	ENSG00000172262
hsa-miR-122-5p	SUGP2	ENSG00000064607
hsa-miR-122-5p	USP31	ENSG00000103404
hsa-miR-122-5p	AFF1	ENSG00000172493
hsa-miR-122-5p	COPS7B	ENSG00000144524
hsa-miR-122-5p	PWWP2B	ENSG00000171813
hsa-miR-122-5p	PLAGL2	ENSG00000126003
hsa-miR-122-5p	NOS1AP	ENSG00000198929
hsa-miR-122-5p	EXPH5	ENSG00000110723
hsa-miR-122-5p	ZNF346	ENSG00000113761
hsa-miR-122-5p	USP1	ENSG00000162607
hsa-miR-122-5p	NETO1	ENSG00000166342
hsa-miR-122-5p	UCK1	ENSG00000130717
hsa-miR-122-5p	CTBP1	ENSG00000159692
hsa-miR-122-5p	SYCP3	ENSG00000139351
hsa-miR-122-5p	GNAZ	ENSG00000128266
hsa-miR-122-5p	DLG1	ENSG00000075711
hsa-miR-122-5p	SMURF2	ENSG00000108854
hsa-miR-122-5p	USP4	ENSG00000114316
hsa-miR-122-5p	SNAP25	ENSG00000132639
hsa-miR-122-5p	IST1	ENSG00000182149
hsa-miR-122-5p	DENND1B	ENSG00000213047
hsa-miR-122-5p	OGT	ENSG00000147162
hsa-miR-122-5p	CACNG7	ENSG00000105605
hsa-miR-122-5p	IDS	ENSG00000010404
hsa-miR-122-5p	RPS15A	ENSG00000134419
hsa-miR-122-5p	GPANK1	ENSG00000204438
hsa-miR-122-5p	PARP11	ENSG00000111224
hsa-miR-122-5p	NELL2	ENSG00000184613
hsa-miR-122-5p	STXBP4	ENSG00000166263
hsa-miR-122-5p	RP11-435D7.3	ENSG00000232335
hsa-miR-122-5p	MAZ	ENSG00000103495
hsa-miR-122-5p	TEFM	ENSG00000172171
hsa-miR-122-5p	BMPR1B	ENSG00000138696
hsa-miR-122-5p	KDM4B	ENSG00000127663
hsa-miR-122-5p	CPNE5	ENSG00000124772
hsa-miR-122-5p	ARHGEF12	ENSG00000196914
hsa-miR-122-5p	ALG1	ENSG00000033011
hsa-miR-122-5p	SZRD1	ENSG00000055070
hsa-miR-122-5p	TBC1D22A	ENSG00000054611
hsa-miR-122-5p	LMBR1L	ENSG00000139636
hsa-miR-122-5p	ME3	ENSG00000151376
hsa-miR-122-5p	CD83	ENSG00000112149
hsa-miR-122-5p	CPS1	ENSG00000021826
hsa-miR-122-5p	SGSH	ENSG00000181523
hsa-miR-122-5p	POMT2	ENSG00000009830
hsa-miR-122-5p	TGS1	ENSG00000137574
hsa-miR-122-5p	VWDE	ENSG00000146530
hsa-miR-122-5p	FAM19A3	ENSG00000184599
hsa-miR-122-5p	DTWD1	ENSG00000104047
hsa-miR-122-5p	NAB2	ENSG00000166886
hsa-miR-122-5p	SECISBP2	ENSG00000187742
hsa-miR-122-5p	BAX	ENSG00000087088
hsa-miR-122-5p	CAPNS1	ENSG00000126247
hsa-miR-122-5p	TBX3	ENSG00000135111
hsa-miR-122-5p	COL27A1	ENSG00000196739
hsa-miR-122-5p	RALGAPA2	ENSG00000188559
hsa-miR-122-5p	SATB2	ENSG00000119042
hsa-miR-122-5p	HNRNPDL	ENSG00000152795
hsa-miR-122-5p	MARS	ENSG00000166986
hsa-miR-122-5p	DBT	ENSG00000137992
hsa-miR-122-5p	UNC13A	ENSG00000130477
hsa-miR-122-5p	RC3H2	ENSG00000056586
hsa-miR-122-5p	CFDP1	ENSG00000153774
hsa-miR-122-5p	RPL14	ENSG00000188846
hsa-miR-122-5p	NUP210	ENSG00000132182
hsa-miR-122-5p	PTGS1	ENSG00000095303
hsa-miR-122-5p	SLC12A6	ENSG00000140199
hsa-miR-122-5p	PSMB7	ENSG00000136930
hsa-miR-122-5p	IFNLR1	ENSG00000185436
hsa-miR-122-5p	KRT14	ENSG00000186847
hsa-miR-122-5p	U2SURP	ENSG00000163714
hsa-miR-122-5p	SLC35E4	ENSG00000100036
hsa-miR-122-5p	MYOF	ENSG00000138119
hsa-miR-122-5p	ANPEP	ENSG00000166825
hsa-miR-122-5p	NKTR	ENSG00000114857
hsa-miR-122-5p	KCTD14	ENSG00000151364
hsa-miR-122-5p	GKN1	ENSG00000169605
hsa-miR-122-5p	DYNC1H1	ENSG00000197102
hsa-miR-122-5p	BACH1	ENSG00000156273
hsa-miR-122-5p	TMEM63A	ENSG00000196187
hsa-miR-122-5p	PKM	ENSG00000067225
hsa-miR-122-5p	PRPF39	ENSG00000185246
hsa-miR-122-5p	TCF12	ENSG00000140262
hsa-miR-122-5p	FOLR1	ENSG00000110195
hsa-miR-122-5p	AGRN	ENSG00000188157
hsa-miR-122-5p	GLMN	ENSG00000174842
hsa-miR-122-5p	NPAS3	ENSG00000151322
hsa-miR-122-5p	GNL3L	ENSG00000130119
hsa-miR-122-5p	STXBP5	ENSG00000164506
hsa-miR-122-5p	LNX1	ENSG00000072201
hsa-miR-122-5p	MKRN2	ENSG00000075975
hsa-miR-122-5p	MRC2	ENSG00000011028
hsa-miR-122-5p	ATXN7L1	ENSG00000146776
hsa-miR-122-5p	COL7A1	ENSG00000114270
hsa-miR-122-5p	HPS4	ENSG00000100099
hsa-miR-122-5p	SLC26A11	ENSG00000181045
hsa-miR-122-5p	RNF150	ENSG00000170153
hsa-miR-122-5p	LMO7	ENSG00000136153
hsa-miR-122-5p	VWA8	ENSG00000102763
hsa-miR-122-5p	HRK	ENSG00000135116
hsa-miR-122-5p	ZC3H6	ENSG00000188177
hsa-miR-122-5p	REV1	ENSG00000135945
hsa-miR-122-5p	KIAA1549	ENSG00000122778
hsa-miR-122-5p	SLC22A3	ENSG00000146477
hsa-miR-122-5p	IQGAP1	ENSG00000140575
hsa-miR-122-5p	UNC45A	ENSG00000140553
hsa-miR-122-5p	ASXL1	ENSG00000171456
hsa-miR-122-5p	WNK1	ENSG00000060237
hsa-miR-122-5p	NME6	ENSG00000172113
hsa-miR-122-5p	MNT	ENSG00000070444
hsa-miR-122-5p	RUFY3	ENSG00000018189
hsa-miR-122-5p	GSE1	ENSG00000131149
hsa-miR-122-5p	GPATCH2	ENSG00000092978
hsa-miR-122-5p	PRSS58	ENSG00000258223
hsa-miR-122-5p	PPRC1	ENSG00000148840
hsa-miR-122-5p	PHF20	ENSG00000025293
hsa-miR-122-5p	B4GALT6	ENSG00000118276
hsa-miR-122-5p	CRIPAK	ENSG00000179979
hsa-miR-122-5p	NBR1	ENSG00000188554
hsa-miR-122-5p	RPL37	ENSG00000145592
hsa-miR-122-5p	PEX3	ENSG00000034693
hsa-miR-122-5p	PAPLN	ENSG00000100767
hsa-miR-122-5p	PRDX2	ENSG00000167815
hsa-miR-122-5p	CA12	ENSG00000074410
hsa-miR-122-5p	PREPL	ENSG00000138078
hsa-miR-122-5p	ANKRD36B	ENSG00000196912
hsa-miR-122-5p	ALDH8A1	ENSG00000118514
hsa-miR-122-5p	TRPS1	ENSG00000104447
hsa-miR-122-5p	RAF1	ENSG00000132155
hsa-miR-122-5p	SLC25A16	ENSG00000122912
hsa-miR-122-5p	ADO	ENSG00000181915
hsa-miR-122-5p	LONP2	ENSG00000102910
hsa-miR-122-5p	FBXO45	ENSG00000174013
hsa-miR-122-5p	NET1	ENSG00000173848
hsa-miR-122-5p	MST1R	ENSG00000164078
hsa-miR-122-5p	SMEK1	ENSG00000100796
hsa-miR-122-5p	ATP7A	ENSG00000165240
hsa-miR-122-5p	HLA-DQA1	ENSG00000206305
hsa-miR-122-5p	TMEM43	ENSG00000170876
hsa-miR-122-5p	TRIM29	ENSG00000137699
hsa-miR-122-5p	SMC5	ENSG00000198887
hsa-miR-122-5p	LIMCH1	ENSG00000064042
hsa-miR-122-5p	GAD1	ENSG00000128683
hsa-miR-122-5p	SLC22A25	ENSG00000196600
hsa-miR-122-5p	EYA4	ENSG00000112319
hsa-miR-122-5p	MAP4K4	ENSG00000071054
hsa-miR-122-5p	ERLIN2	ENSG00000147475
hsa-miR-122-5p	GFOD1	ENSG00000145990
hsa-miR-122-5p	AKAP1	ENSG00000121057
hsa-miR-122-5p	MPZL1	ENSG00000197965
hsa-miR-122-5p	ZNF333	ENSG00000160961
hsa-miR-122-5p	LRP11	ENSG00000120256
hsa-miR-122-5p	SMC3	ENSG00000108055
hsa-miR-122-5p	ARSB	ENSG00000113273
hsa-miR-122-5p	CDKN1B	ENSG00000111276
hsa-miR-122-5p	TMED5	ENSG00000117500
hsa-miR-122-5p	TRMT61B	ENSG00000171103
hsa-miR-122-5p	SRGAP1	ENSG00000196935
hsa-miR-122-5p	MMRN2	ENSG00000173269
hsa-miR-122-5p	CASC4	ENSG00000166734
hsa-miR-122-5p	GNPDA2	ENSG00000163281
hsa-miR-122-5p	DSTYK	ENSG00000133059
hsa-miR-122-5p	TRAF4	ENSG00000076604
hsa-miR-122-5p	IMMT	ENSG00000132305
hsa-miR-122-5p	C12orf66	ENSG00000174206
hsa-miR-122-5p	ZDHHC11	ENSG00000188818
hsa-miR-122-5p	MACF1	ENSG00000127603
hsa-miR-122-5p	SAPCD1	ENSG00000228727
hsa-miR-122-5p	TMTC3	ENSG00000139324
hsa-miR-122-5p	PAPPA	ENSG00000182752
hsa-miR-122-5p	EME1	ENSG00000154920
hsa-miR-122-5p	KIF13A	ENSG00000137177
hsa-miR-122-5p	RPL38	ENSG00000172809
hsa-miR-122-5p	PPP6C	ENSG00000119414
hsa-miR-122-5p	CCDC14	ENSG00000175455
hsa-miR-122-5p	PLD1	ENSG00000075651
hsa-miR-122-5p	GALNT11	ENSG00000178234
hsa-miR-122-5p	BOD1L1	ENSG00000038219
hsa-miR-122-5p	DDX59	ENSG00000118197
hsa-miR-122-5p	INTS4	ENSG00000149262
hsa-miR-122-5p	ZSCAN29	ENSG00000140265
hsa-miR-122-5p	EFHC1	ENSG00000096093
hsa-miR-122-5p	AFF4	ENSG00000072364
hsa-miR-122-5p	TIMM8A	ENSG00000126953
hsa-miR-122-5p	ATPIF1	ENSG00000130770
hsa-miR-122-5p	EPG5	ENSG00000152223
hsa-miR-122-5p	PPEF1	ENSG00000086717
hsa-miR-122-5p	N4BP2L2	ENSG00000244754
hsa-miR-122-5p	IRF2BP2	ENSG00000168264
hsa-miR-122-5p	TTC17	ENSG00000052841
hsa-miR-122-5p	LPAR2	ENSG00000064547
hsa-miR-122-5p	RBM22	ENSG00000086589
hsa-miR-122-5p	NDUFA5	ENSG00000128609
hsa-miR-122-5p	SLC7A11	ENSG00000151012
hsa-miR-122-5p	TM9SF4	ENSG00000101337
hsa-miR-122-5p	C9orf16	ENSG00000171159
hsa-miR-122-5p	SUDS3	ENSG00000111707
hsa-miR-122-5p	MEF2D	ENSG00000116604
hsa-miR-122-5p	MTMR9	ENSG00000104643
hsa-miR-122-5p	TNKS2	ENSG00000107854
hsa-miR-122-5p	ATP1B1	ENSG00000143153
hsa-miR-122-5p	BRCA2	ENSG00000139618
hsa-miR-122-5p	URI1	ENSG00000105176
hsa-miR-122-5p	GPATCH2L	ENSG00000089916
hsa-miR-122-5p	ELMO2	ENSG00000062598
hsa-miR-122-5p	TJP2	ENSG00000119139
hsa-miR-122-5p	TNFSF15	ENSG00000181634
hsa-miR-122-5p	ZNF292	ENSG00000188994
hsa-miR-122-5p	SCUBE3	ENSG00000146197
hsa-miR-122-5p	IPPK	ENSG00000127080
hsa-miR-122-5p	THRA	ENSG00000126351
hsa-miR-122-5p	ZSCAN4	ENSG00000180532
hsa-miR-122-5p	PI4KB	ENSG00000143393
hsa-miR-122-5p	ABCC10	ENSG00000124574
hsa-miR-122-5p	GON4L	ENSG00000116580
hsa-miR-122-5p	MLLT3	ENSG00000171843
hsa-miR-122-5p	SETD5	ENSG00000168137
hsa-miR-122-5p	NFYA	ENSG00000001167
hsa-miR-122-5p	PLXNA1	ENSG00000114554
hsa-miR-122-5p	IGF1R	ENSG00000140443
hsa-miR-122-5p	TPGS2	ENSG00000134779
hsa-miR-122-5p	SLC26A6	ENSG00000225697
hsa-miR-122-5p	NEMF	ENSG00000165525
hsa-miR-122-5p	OSBPL3	ENSG00000070882
hsa-miR-122-5p	MINK1	ENSG00000141503
hsa-miR-122-5p	CCDC84	ENSG00000186166
hsa-miR-122-5p	DDX17	ENSG00000100201
hsa-miR-122-5p	RAB12	ENSG00000206418
hsa-miR-122-5p	ENTHD1	ENSG00000176177
hsa-miR-122-5p	EGFR	ENSG00000146648
hsa-miR-122-5p	SURF1	ENSG00000148290
hsa-miR-122-5p	PSME4	ENSG00000068878
hsa-miR-122-5p	ARL17B	ENSG00000228696
hsa-miR-122-5p	UGP2	ENSG00000169764
hsa-miR-122-5p	RDH13	ENSG00000160439
hsa-miR-122-5p	EVI5	ENSG00000067208
hsa-miR-122-5p	ZFHX3	ENSG00000140836
hsa-miR-122-5p	ZNF195	ENSG00000005801
hsa-miR-122-5p	ARF1	ENSG00000143761
hsa-miR-122-5p	GSTM3	ENSG00000134202
hsa-miR-122-5p	SSBP1	ENSG00000106028
hsa-miR-122-5p	GEN1	ENSG00000178295
hsa-miR-122-5p	DCLRE1C	ENSG00000152457
hsa-miR-122-5p	DNAJC7	ENSG00000168259
hsa-miR-122-5p	ZNF580	ENSG00000213015
hsa-miR-122-5p	SQSTM1	ENSG00000161011
hsa-miR-122-5p	CARD9	ENSG00000187796
hsa-miR-122-5p	SERAC1	ENSG00000122335
hsa-miR-122-5p	ID4	ENSG00000172201
hsa-miR-122-5p	USP47	ENSG00000170242
hsa-miR-122-5p	SLC15A2	ENSG00000163406
hsa-miR-122-5p	ARHGEF10	ENSG00000104728
hsa-miR-122-5p	SNN	ENSG00000184602
hsa-miR-122-5p	LUC7L3	ENSG00000108848
hsa-miR-122-5p	NOP56	ENSG00000101361
hsa-miR-122-5p	RHOU	ENSG00000116574
hsa-miR-122-5p	IKZF4	ENSG00000123411
hsa-miR-122-5p	ZNF224	ENSG00000267680
hsa-miR-122-5p	MFNG	ENSG00000100060
hsa-miR-122-5p	CHTF18	ENSG00000127586
hsa-miR-122-5p	CSPP1	ENSG00000104218
hsa-miR-122-5p	GCNT7	ENSG00000124091
hsa-miR-122-5p	EIF3B	ENSG00000106263
hsa-miR-122-5p	PRDM5	ENSG00000138738
hsa-miR-122-5p	GRAMD3	ENSG00000155324
hsa-miR-122-5p	SF1	ENSG00000168066
hsa-miR-122-5p	SMIM14	ENSG00000163683
hsa-miR-122-5p	ENSA	ENSG00000143420
hsa-miR-122-5p	CHD7	ENSG00000171316
hsa-miR-122-5p	FDFT1	ENSG00000079459
hsa-miR-122-5p	ART3	ENSG00000156219
hsa-miR-122-5p	KDM2A	ENSG00000173120
hsa-miR-122-5p	CDK5R1	ENSG00000176749
hsa-miR-122-5p	MED17	ENSG00000042429
hsa-miR-122-5p	PMP22	ENSG00000109099
hsa-miR-122-5p	NCAM1	ENSG00000149294
hsa-miR-122-5p	GOT1L1	ENSG00000169154
hsa-miR-122-5p	RAB1A	ENSG00000138069
hsa-miR-122-5p	FAM13A	ENSG00000138640
hsa-miR-122-5p	PDCD6	ENSG00000249915
hsa-miR-122-5p	HIC2	ENSG00000169635
hsa-miR-122-5p	HECW2	ENSG00000138411
hsa-miR-122-5p	GAS2L3	ENSG00000139354
hsa-miR-122-5p	ZNF85	ENSG00000105750
hsa-miR-122-5p	WDR90	ENSG00000161996
hsa-miR-122-5p	QSER1	ENSG00000060749
hsa-miR-122-5p	STT3B	ENSG00000163527
hsa-miR-122-5p	COQ9	ENSG00000088682
hsa-miR-122-5p	IGF-1R(hsa)	IGF-1R(hsa)
hsa-miR-122-5p	HOXB3	ENSG00000120093
hsa-miR-122-5p	SLC7A5	ENSG00000103257
hsa-miR-122-5p	UBE2I	ENSG00000103275
hsa-miR-122-5p	EP400	ENSG00000183495
hsa-miR-122-5p	GXYLT1	ENSG00000151233
hsa-miR-122-5p	CD9	ENSG00000010278
hsa-miR-122-5p	RSL1D1	ENSG00000171490
hsa-miR-122-5p	HEG1	ENSG00000173706
hsa-miR-122-5p	KIF23	ENSG00000137807
hsa-miR-122-5p	TRA2A	ENSG00000164548
hsa-miR-122-5p	NISCH	ENSG00000010322
hsa-miR-122-5p	SLC25A40	ENSG00000075303
hsa-miR-122-5p	AGAP4	ENSG00000188234
hsa-miR-122-5p	RSRP1	ENSG00000117616
hsa-miR-122-5p	KIAA1217	ENSG00000120549
hsa-miR-122-5p	MT4	ENSG00000102891
hsa-miR-122-5p	CNNM2	ENSG00000148842
hsa-miR-122-5p	TNFSF11	ENSG00000120659
hsa-miR-122-5p	MARK3	ENSG00000075413
hsa-miR-122-5p	MVB12B	ENSG00000196814
hsa-miR-122-5p	ANKRD32	ENSG00000133302
hsa-miR-122-5p	COX16	ENSG00000133983
hsa-miR-122-5p	PHF10	ENSG00000130024
hsa-miR-122-5p	MID1	ENSG00000101871
hsa-miR-122-5p	CHD4	ENSG00000111642
hsa-miR-122-5p	DENND1A	ENSG00000119522
hsa-miR-122-5p	C11orf57	ENSG00000150776
hsa-miR-122-5p	FZD3	ENSG00000104290
hsa-miR-122-5p	FNBP1	ENSG00000187239
hsa-miR-122-5p	ZBTB41	ENSG00000177888
hsa-miR-122-5p	C3orf22	ENSG00000180697
hsa-miR-122-5p	ZNF304	ENSG00000131845
hsa-miR-122-5p	ZMYM5	ENSG00000132950
hsa-miR-122-5p	PACS2	ENSG00000179364
hsa-miR-122-5p	ZCCHC2	ENSG00000141664
hsa-miR-122-5p	MORF4L2	ENSG00000123562
hsa-miR-122-5p	TRAM2	ENSG00000065308
hsa-miR-122-5p	ZNF107	ENSG00000196247
hsa-miR-122-5p	IL7R	ENSG00000168685
hsa-miR-122-5p	OTOS	ENSG00000178602
hsa-miR-122-5p	QTRTD1	ENSG00000151576
hsa-miR-122-5p	MUC6	ENSG00000184956
hsa-miR-122-5p	SLCO3A1	ENSG00000176463
hsa-miR-122-5p	POLR2J	ENSG00000005075
hsa-miR-122-5p	CELF1	ENSG00000149187
hsa-miR-122-5p	PHPT1	ENSG00000054148
hsa-miR-122-5p	SRSF7	ENSG00000115875
hsa-miR-122-5p	VHL	ENSG00000134086
hsa-miR-122-5p	SLC26A7	ENSG00000147606
hsa-miR-122-5p	DHX57	ENSG00000163214
hsa-miR-122-5p	TFPI	ENSG00000003436
hsa-miR-122-5p	TAB3	ENSG00000157625
hsa-miR-122-5p	DST	ENSG00000151914
hsa-miR-122-5p	KIAA2026	ENSG00000183354
hsa-miR-122-5p	DLEC1	ENSG00000008226
hsa-miR-122-5p	EXOC3	ENSG00000180104
hsa-miR-122-5p	ABHD2	ENSG00000140526
hsa-miR-122-5p	KIAA0101	ENSG00000166803
hsa-miR-122-5p	CANX	ENSG00000127022
hsa-miR-122-5p	FAM160A1	ENSG00000164142
hsa-miR-122-5p	IFNA1	ENSG00000197919
hsa-miR-122-5p	FOXK2	ENSG00000141568
hsa-miR-122-5p	SIKE1	ENSG00000052723
hsa-miR-122-5p	CAPRIN1	ENSG00000135387
hsa-miR-122-5p	KLHL29	ENSG00000119771
hsa-miR-122-5p	DDX10	ENSG00000178105
hsa-miR-122-5p	KIAA1109	ENSG00000138688
hsa-miR-122-5p	CNTRL	ENSG00000119397
hsa-miR-122-5p	IER3	ENSG00000137331
hsa-miR-122-5p	CAMKK2	ENSG00000110931
hsa-miR-122-5p	NFX1	ENSG00000086102
hsa-miR-122-5p	SCN4B	ENSG00000177098
hsa-miR-122-5p	LPP	ENSG00000145012
hsa-miR-122-5p	ATP2B1	ENSG00000070961
hsa-miR-122-5p	NSD1	ENSG00000165671
hsa-miR-122-5p	PIP4K2A	ENSG00000150867
hsa-miR-122-5p	FAM222B	ENSG00000173065
hsa-miR-122-5p	MYCBP2	ENSG00000005810
hsa-miR-122-5p	USP28	ENSG00000048028
hsa-miR-122-5p	ALCAM	ENSG00000170017
hsa-miR-122-5p	SLC16A3	ENSG00000141526
hsa-miR-122-5p	FAM221A	ENSG00000188732
hsa-miR-122-5p	G6PD	ENSG00000160211
hsa-miR-122-5p	USP12	ENSG00000152484
hsa-miR-122-5p	PAK1	ENSG00000149269
hsa-miR-122-5p	MFHAS1	ENSG00000147324
hsa-miR-122-5p	CUL4A	ENSG00000139842
hsa-miR-122-5p	TP53	ENSG00000141510
hsa-miR-122-5p	BAG4	ENSG00000156735
hsa-miR-122-5p	TNRC6B	ENSG00000100354
hsa-miR-122-5p	DHODH	ENSG00000102967
hsa-miR-122-5p	NDUFS8	ENSG00000110717
hsa-miR-122-5p	KRT18	ENSG00000111057
hsa-miR-122-5p	NUAK1	ENSG00000074590
hsa-miR-122-5p	PRRC2C	ENSG00000117523
hsa-miR-122-5p	RPP14	ENSG00000163684
hsa-miR-122-5p	RPL23	ENSG00000125691
hsa-miR-122-5p	C9orf69	ENSG00000238227
hsa-miR-122-5p	RICTOR	ENSG00000164327
hsa-miR-122-5p	ASH1L	ENSG00000116539
hsa-miR-122-5p	MBD3	ENSG00000071655
hsa-miR-122-5p	RBBP6	ENSG00000122257
hsa-miR-122-5p	MTMR7	ENSG00000003987
hsa-miR-122-5p	SRSF1	ENSG00000136450
hsa-miR-122-5p	PURB	ENSG00000146676
hsa-miR-122-5p	LRPPRC	ENSG00000138095
hsa-miR-122-5p	VPS13B	ENSG00000132549
hsa-miR-122-5p	SREBF2	ENSG00000198911
hsa-miR-122-5p	CTTN	ENSG00000085733
hsa-miR-122-5p	ADAM17	ENSG00000151694
hsa-miR-122-5p	CCDC150	ENSG00000144395
hsa-miR-122-5p	RIMS1	ENSG00000079841
hsa-miR-122-5p	ZNF207	ENSG00000010244
hsa-miR-122-5p	SPIN2A	ENSG00000147059
hsa-miR-122-5p	GLDN	ENSG00000186417
hsa-miR-122-5p	AKAP8L	ENSG00000011243
hsa-miR-122-5p	MIS18BP1	ENSG00000129534
hsa-miR-122-5p	RALGPS2	ENSG00000116191
hsa-miR-122-5p	JAKMIP2	ENSG00000176049
hsa-miR-122-5p	G6PC3	ENSG00000141349
hsa-miR-122-5p	DCAF7	ENSG00000136485
hsa-miR-122-5p	ANGPTL4	ENSG00000167772
hsa-miR-122-5p	CREB1	ENSG00000118260
hsa-miR-122-5p	NMNAT2	ENSG00000157064
hsa-miR-122-5p	GRIA2	ENSG00000120251
hsa-miR-122-5p	KLF13	ENSG00000169926
hsa-miR-122-5p	NUMA1	ENSG00000137497
hsa-miR-122-5p	MRPS5	ENSG00000144029
hsa-miR-122-5p	JPH3	ENSG00000154118
hsa-miR-122-5p	GREB1L	ENSG00000141449
hsa-miR-122-5p	ZNF233	ENSG00000159915
hsa-miR-122-5p	BPGM	ENSG00000172331
hsa-miR-122-5p	WDR74	ENSG00000133316
hsa-miR-122-5p	CES2	ENSG00000172831
hsa-miR-122-5p	CDA	ENSG00000158825
hsa-miR-122-5p	MMAA	ENSG00000151611
hsa-miR-122-5p	UBA6	ENSG00000033178
hsa-miR-122-5p	SLC7A1	ENSG00000139514
hsa-miR-122-5p	MYO1D	ENSG00000176658
hsa-miR-122-5p	SLC2A3	ENSG00000059804
hsa-miR-122-5p	ARID2	ENSG00000189079
hsa-miR-122-5p	SLC25A30	ENSG00000174032
hsa-miR-122-5p	PTPN13	ENSG00000163629
hsa-miR-122-5p	TAMM41	ENSG00000144559
hsa-miR-122-5p	ATM	ENSG00000149311
hsa-miR-122-5p	SOGA1	ENSG00000149639
hsa-miR-122-5p	LAMC3	ENSG00000050555
hsa-miR-122-5p	NDUFAF7	ENSG00000003509
hsa-miR-122-5p	RPLP2	ENSG00000177600
hsa-miR-122-5p	EIF2S3	ENSG00000130741
hsa-miR-122-5p	MOB3B	ENSG00000120162
hsa-miR-122-5p	LRCH3	ENSG00000186001
hsa-miR-122-5p	LCORL	ENSG00000178177
hsa-miR-122-5p	WSB2	ENSG00000176871
hsa-miR-122-5p	GART	ENSG00000159131
hsa-miR-122-5p	TFDP2	ENSG00000269905
hsa-miR-122-5p	EML5	ENSG00000165521
hsa-miR-122-5p	DIP2C	ENSG00000151240
hsa-miR-122-5p	DCAF6	ENSG00000143164
hsa-miR-122-5p	GGA3	ENSG00000125447
hsa-miR-122-5p	LPCAT4	ENSG00000176454
hsa-miR-122-5p	POU6F1	ENSG00000184271
hsa-miR-122-5p	RPAIN	ENSG00000129197
hsa-miR-122-5p	PSD3	ENSG00000156011
hsa-miR-122-5p	OBSCN	ENSG00000154358
hsa-miR-122-5p	KLHL42	ENSG00000087448
hsa-miR-122-5p	PTCD1	ENSG00000106246
hsa-miR-122-5p	KIAA1147	ENSG00000257093
hsa-miR-122-5p	ZFYVE16	ENSG00000039319
hsa-miR-122-5p	PGM2L1	ENSG00000165434
hsa-miR-122-5p	CCAR1	ENSG00000060339
hsa-miR-122-5p	ALPK1	ENSG00000073331
hsa-miR-122-5p	CSRP1	ENSG00000159176
hsa-miR-122-5p	C4orf29	ENSG00000164074
hsa-miR-122-5p	POLR3A	ENSG00000148606
hsa-miR-122-5p	DMD	ENSG00000198947
hsa-miR-122-5p	ANKRD9	ENSG00000156381
hsa-miR-122-5p	SUPT20H	ENSG00000102710
hsa-miR-122-5p	KANSL1	ENSG00000120071
hsa-miR-122-5p	PHTF2	ENSG00000006576
hsa-miR-122-5p	B3GAT2	ENSG00000112309
hsa-miR-122-5p	NDE1	ENSG00000072864
hsa-miR-122-5p	RNF145	ENSG00000145860
hsa-miR-122-5p	SLC9A1	ENSG00000090020
hsa-miR-122-5p	PPP1R3A	ENSG00000154415
hsa-miR-122-5p	DENND5A	ENSG00000184014
hsa-miR-122-5p	CHKB	ENSG00000100288
hsa-miR-122-5p	SMC4	ENSG00000113810
hsa-miR-122-5p	TAF1D	ENSG00000166012
hsa-miR-122-5p	SFXN1	ENSG00000164466
hsa-miR-122-5p	NFAT5	ENSG00000102908
hsa-miR-122-5p	RBM39	ENSG00000131051
hsa-miR-122-5p	CMIP	ENSG00000153815
hsa-miR-122-5p	NAV1	ENSG00000134369
hsa-miR-122-5p	RPL35A	ENSG00000182899
hsa-miR-122-5p	SLC5A3	ENSG00000198743
hsa-miR-122-5p	THRAP3	ENSG00000054118
hsa-miR-122-5p	IFT27	ENSG00000100360
hsa-miR-122-5p	RIF1	ENSG00000080345
hsa-miR-122-5p	PRDXII(hsa)	PRDXII(hsa)
hsa-miR-122-5p	C1orf122	ENSG00000197982
hsa-miR-122-5p	RLN1	ENSG00000107018
hsa-miR-122-5p	DRAM2	ENSG00000156171
hsa-miR-122-5p	RFXAP	ENSG00000133111
hsa-miR-122-5p	DCN	ENSG00000011465
hsa-miR-122-5p	NOTCH1	ENSG00000148400
hsa-miR-122-5p	CCDC142	ENSG00000135637
hsa-miR-122-5p	LARP1B	ENSG00000138709
hsa-miR-122-5p	PLCG1	ENSG00000124181
hsa-miR-122-5p	NA	ENSG00000198566
hsa-miR-122-5p	DNAJB1	ENSG00000132002
hsa-miR-122-5p	CENPI	ENSG00000102384
hsa-miR-122-5p	TMC6	ENSG00000141524
hsa-miR-122-5p	TMTC4	ENSG00000125247
hsa-miR-122-5p	C1RL	ENSG00000139178
hsa-miR-122-5p	NCOR2	ENSG00000196498
hsa-miR-122-5p	ARL15	ENSG00000185305
hsa-miR-122-5p	PIK3CD	ENSG00000171608
hsa-miR-122-5p	B4GALT1	ENSG00000086062
hsa-miR-122-5p	C3orf56	ENSG00000214324
hsa-miR-122-5p	PABPC1L	ENSG00000101104
hsa-miR-122-5p	RRP1	ENSG00000160214
hsa-miR-122-5p	PSCA	ENSG00000167653
hsa-miR-122-5p	C7orf63	ENSG00000105792
hsa-miR-122-5p	DCP2	ENSG00000172795
hsa-miR-122-5p	CDK3	ENSG00000250506
hsa-miR-122-5p	FBN2	ENSG00000138829
hsa-miR-122-5p	DNPEP	ENSG00000123992
hsa-miR-122-5p	FANCM	ENSG00000187790
hsa-miR-122-5p	C19orf54	ENSG00000188493
hsa-miR-122-5p	GOLGA8A	ENSG00000175265
hsa-miR-122-5p	NCAPD2	ENSG00000010292
hsa-miR-122-5p	FAM208B	ENSG00000108021
hsa-miR-122-5p	TOP2A	ENSG00000131747
hsa-miR-122-5p	MAN2B1	ENSG00000104774
hsa-miR-122-5p	JAK2	ENSG00000096968
hsa-miR-122-5p	ILF3	ENSG00000129351
hsa-miR-122-5p	ZNF133	ENSG00000125846
hsa-miR-122-5p	GP2	ENSG00000169347
hsa-miR-122-5p	SMAD4	ENSG00000141646
hsa-miR-122-5p	EPHB4	ENSG00000196411
hsa-miR-122-5p	USP32	ENSG00000170832
hsa-miR-122-5p	FNDC3B	ENSG00000075420
hsa-miR-122-5p	GIT1	ENSG00000108262
hsa-miR-122-5p	ABHD11	ENSG00000106077
hsa-miR-122-5p	ZNF805	ENSG00000204524
hsa-miR-122-5p	CNOT7	ENSG00000198791
hsa-miR-122-5p	ALG14	ENSG00000172339
hsa-miR-122-5p	TOX3	ENSG00000103460
hsa-miR-122-5p	PTPRO	ENSG00000151490
hsa-miR-122-5p	ANXA7	ENSG00000138279
hsa-miR-122-5p	SPEN	ENSG00000065526
hsa-miR-122-5p	MSH6	ENSG00000116062
hsa-miR-122-5p	SNRPA	ENSG00000077312
hsa-miR-122-5p	BICD1	ENSG00000151746
hsa-miR-122-5p	TRIM65	ENSG00000141569
hsa-miR-122-5p	PLEKHB2	ENSG00000115762
hsa-miR-122-5p	SMARCC2	ENSG00000139613
hsa-miR-122-5p	PABPC3	ENSG00000151846
hsa-miR-122-5p	HECTD3	ENSG00000126107
hsa-miR-122-5p	HAL	ENSG00000084110
hsa-miR-122-5p	STRBP	ENSG00000165209
hsa-miR-122-5p	FARSB	ENSG00000116120
hsa-miR-122-5p	NRD1	ENSG00000078618
hsa-miR-122-5p	GIGYF2	ENSG00000204120
hsa-miR-122-5p	MYLIP	ENSG00000007944
hsa-miR-122-5p	MIB2	ENSG00000197530
hsa-miR-122-5p	ABCB1	ENSG00000085563
hsa-miR-122-5p	EPHA3	ENSG00000044524
hsa-miR-122-5p	ASPM	ENSG00000066279
hsa-miR-122-5p	CDV3	ENSG00000091527
hsa-miR-122-5p	PNP	ENSG00000198805
hsa-miR-122-5p	NPEPPS	ENSG00000141279
hsa-miR-122-5p	ZNF264	ENSG00000083844
hsa-miR-122-5p	OPHN1	ENSG00000079482
hsa-miR-122-5p	NEK4	ENSG00000114904
hsa-miR-122-5p	WBP1L	ENSG00000166272
hsa-miR-122-5p	TP73	ENSG00000078900
hsa-miR-122-5p	RAPGEF2	ENSG00000109756
hsa-miR-122-5p	TSR1	ENSG00000167721
hsa-miR-122-5p	NEK1	ENSG00000137601
hsa-miR-122-5p	NFATC2IP	ENSG00000176953
hsa-miR-122-5p	SLC19A2	ENSG00000117479
hsa-miR-122-5p	COL4A2	ENSG00000134871
hsa-miR-122-5p	HSDL2	ENSG00000119471
hsa-miR-122-5p	TRAK1	ENSG00000182606
hsa-miR-122-5p	RBMS3	ENSG00000144642
hsa-miR-122-5p	DYNC1LI2	ENSG00000135720
hsa-miR-122-5p	E2F3	ENSG00000112242
hsa-miR-122-5p	ZNF277	ENSG00000198839
hsa-miR-122-5p	MCTP2	ENSG00000140563
hsa-miR-122-5p	SMCHD1	ENSG00000101596
hsa-miR-122-5p	ZNF254	ENSG00000213096
hsa-miR-122-5p	DMXL1	ENSG00000172869
hsa-miR-122-5p	SEC14L1	ENSG00000129657
hsa-miR-122-5p	COX5B	ENSG00000135940
hsa-miR-122-5p	FAF1	ENSG00000185104
hsa-miR-122-5p	AKT1	ENSG00000142208
hsa-miR-122-5p	SLC35D2	ENSG00000130958
hsa-miR-122-5p	PGF	ENSG00000119630
hsa-miR-122-5p	ZC3H7B	ENSG00000100403
hsa-miR-122-5p	KTN1	ENSG00000126777
hsa-miR-122-5p	ZNF493	ENSG00000196268
hsa-miR-122-5p	FOSB	ENSG00000125740
hsa-miR-122-5p	PPP2R2A	ENSG00000221914
hsa-miR-122-5p	SPTLC3	ENSG00000172296
hsa-miR-122-5p	DNAJC1	ENSG00000136770
hsa-miR-122-5p	RAVER1	ENSG00000161847
hsa-miR-122-5p	LNPEP	ENSG00000113441
hsa-miR-122-5p	MED26	ENSG00000105085
hsa-miR-122-5p	MARCKS	ENSG00000155130
hsa-miR-122-5p	TNFRSF10A	ENSG00000104689
hsa-miR-122-5p	CLEC11A	ENSG00000105472
hsa-miR-122-5p	ZNF44	ENSG00000197857
hsa-miR-122-5p	FOXN3	ENSG00000053254
hsa-miR-122-5p	MYC	ENSG00000136997
hsa-miR-122-5p	QKI	ENSG00000112531
hsa-miR-122-5p	TMC5	ENSG00000103534
hsa-miR-122-5p	CCDC91	ENSG00000123106
hsa-miR-122-5p	SCGB3A2	ENSG00000164265
hsa-miR-122-5p	PBRM1	ENSG00000163939
hsa-miR-122-5p	PARVA	ENSG00000197702
hsa-miR-122-5p	CENPF	ENSG00000117724
hsa-miR-122-5p	SON	ENSG00000159140
hsa-miR-122-5p	AVIL	ENSG00000135407
hsa-miR-122-5p	HNRNPC	ENSG00000092199
hsa-miR-122-5p	SF3B2	ENSG00000087365
hsa-miR-122-5p	CTDSPL	ENSG00000144677
hsa-miR-122-5p	FBXL17	ENSG00000145743
hsa-miR-122-5p	DOCK5	ENSG00000147459
hsa-miR-122-5p	MKLN1	ENSG00000128585
hsa-miR-122-5p	TCTN1	ENSG00000204852
hsa-miR-122-5p	ABCC2	ENSG00000023839
hsa-miR-122-5p	VEZT	ENSG00000028203
hsa-miR-122-5p	SFXN3	ENSG00000107819
hsa-miR-122-5p	WSB1	ENSG00000109046
hsa-miR-122-5p	TMCC3	ENSG00000057704
hsa-miR-122-5p	ARL17A	ENSG00000185829
hsa-miR-122-5p	YBEY	ENSG00000182362
hsa-miR-122-5p	WDR11	ENSG00000120008
hsa-miR-122-5p	OCIAD1	ENSG00000109180
hsa-miR-122-5p	POLR1B	ENSG00000125630
hsa-miR-122-5p	DIAPH1	ENSG00000131504
hsa-miR-122-5p	NUDT10	ENSG00000122824
hsa-miR-122-5p	SERPINB6	ENSG00000124570
hsa-miR-122-5p	FAM133A	ENSG00000179083
hsa-miR-122-5p	EIF3A	ENSG00000107581
hsa-miR-122-5p	ENOSF1	ENSG00000132199
hsa-miR-122-5p	ITPRIPL2	ENSG00000205730
hsa-miR-122-5p	ZNF583	ENSG00000198440
hsa-miR-122-5p	COL5A1	ENSG00000130635
hsa-miR-122-5p	NA	ENSG00000206327
hsa-miR-122-5p	FAM63A	ENSG00000143409
hsa-miR-122-5p	GOLGA4	ENSG00000144674
hsa-miR-122-5p	SLC25A34	ENSG00000162461
hsa-miR-122-5p	KLF3	ENSG00000109787
hsa-miR-122-5p	MTRF1	ENSG00000120662
hsa-miR-122-5p	TMEM86B	ENSG00000180089
hsa-miR-122-5p	CCDC22	ENSG00000101997
hsa-miR-122-5p	HSF5	ENSG00000176160
hsa-miR-122-5p	CCDC90B	ENSG00000137500
hsa-miR-122-5p	EIF4A2	ENSG00000156976
hsa-miR-122-5p	MTPN	ENSG00000105887
hsa-miR-122-5p	GALNT3	ENSG00000115339
hsa-miR-122-5p	PLAT	ENSG00000104368
hsa-miR-122-5p	INTS7	ENSG00000143493
hsa-miR-122-5p	PFDN1	ENSG00000113068
hsa-miR-122-5p	KIAA1683	ENSG00000130518
hsa-miR-122-5p	PCNXL2	ENSG00000135749
hsa-miR-122-5p	FLNB	ENSG00000136068
hsa-miR-122-5p	TMEM241	ENSG00000134490
hsa-miR-122-5p	RNF34	ENSG00000170633
hsa-miR-122-5p	SPAG9	ENSG00000008294
hsa-miR-122-5p	KRT10	ENSG00000186395
hsa-miR-122-5p	MAPKAPK3	ENSG00000114738
hsa-miR-122-5p	TMED10	ENSG00000170348
hsa-miR-122-5p	ZAK	ENSG00000091436
hsa-miR-122-5p	IFI16	ENSG00000163565
hsa-miR-122-5p	CEACAM8	ENSG00000124469
hsa-miR-122-5p	CEP350	ENSG00000135837
hsa-miR-122-5p	ZNF692	ENSG00000171163
hsa-miR-122-5p	ATRX	ENSG00000085224
hsa-miR-122-5p	NA	ENSG00000023843
hsa-miR-122-5p	TTC3	ENSG00000182670
hsa-miR-122-5p	SUCLA2	ENSG00000136143
hsa-miR-122-5p	HOXB6	ENSG00000108511
hsa-miR-122-5p	SMN1	ENSG00000172062
hsa-miR-122-5p	SNRPA1	ENSG00000131876
hsa-miR-122-5p	SET	ENSG00000119335
hsa-miR-122-5p	ZMYM2	ENSG00000121741
hsa-miR-122-5p	HMOX1	ENSG00000100292
hsa-miR-122-5p	APLP2	ENSG00000084234
hsa-miR-122-5p	FLT1	ENSG00000102755
hsa-miR-122-5p	SLC11A2	ENSG00000110911
hsa-miR-122-5p	DENND4C	ENSG00000137145
hsa-miR-122-5p	TMA7	ENSG00000232112
hsa-miR-122-5p	GPHB5	ENSG00000179600
hsa-miR-122-5p	NFKBIA	ENSG00000100906
hsa-miR-122-5p	SECTM1	ENSG00000141574
hsa-miR-122-5p	MYCBP	ENSG00000214114
hsa-miR-122-5p	LRFN1	ENSG00000128011
hsa-miR-122-5p	DDX46	ENSG00000145833
hsa-miR-122-5p	ZNF100	ENSG00000197020
hsa-miR-122-5p	RBBP5	ENSG00000117222
hsa-miR-122-5p	MED31	ENSG00000108590
hsa-miR-122-5p	RAB18	ENSG00000099246
hsa-miR-122-5p	RUSC1-AS1	ENSG00000225855
hsa-miR-122-5p	BATF2	ENSG00000168062
hsa-miR-122-5p	RBL1	ENSG00000080839
hsa-miR-122-5p	JMJD1C	ENSG00000171988
hsa-miR-122-5p	NOL4L	ENSG00000197183
hsa-miR-122-5p	HNRNPM	ENSG00000099783
hsa-miR-122-5p	RBM26	ENSG00000139746
hsa-miR-122-5p	STAU2	ENSG00000040341
hsa-miR-122-5p	CLK1	ENSG00000013441
hsa-miR-122-5p	ERCC1	ENSG00000012061
hsa-miR-122-5p	DIS3L2	ENSG00000144535
hsa-miR-122-5p	RAB11FIP3	ENSG00000090565
hsa-miR-122-5p	MMD	ENSG00000108960
hsa-miR-122-5p	PLA2G5	ENSG00000127472
hsa-miR-122-5p	MRPL38	ENSG00000204316
hsa-miR-122-5p	COL4A3	ENSG00000169031
hsa-miR-122-5p	SFPQ	ENSG00000116560
hsa-miR-122-5p	CDC42BPA	ENSG00000143776
hsa-miR-122-5p	RNGTT	ENSG00000111880
hsa-miR-122-5p	MEGF6	ENSG00000162591
hsa-miR-122-5p	ESCO1	ENSG00000141446
hsa-miR-122-5p	SIRT4	ENSG00000089163
hsa-miR-122-5p	SNHG12	ENSG00000197989
hsa-miR-122-5p	ZCCHC6	ENSG00000083223
hsa-miR-122-5p	FAM9B	ENSG00000177138
hsa-miR-122-5p	ADAMTSL4	ENSG00000143382
hsa-miR-122-5p	CDCA7	ENSG00000144354
hsa-miR-122-5p	RBBP4	ENSG00000162521
hsa-miR-122-5p	TEAD1	ENSG00000187079
hsa-miR-122-5p	PXK	ENSG00000168297
hsa-miR-122-5p	ERP29	ENSG00000089248
hsa-miR-122-5p	SLC35E1	ENSG00000127526
hsa-miR-122-5p	SATB1	ENSG00000182568
hsa-miR-122-5p	PHYKPL	ENSG00000175309
hsa-miR-122-5p	GTF2A2	ENSG00000140307
hsa-miR-122-5p	SKI	ENSG00000157933
hsa-miR-122-5p	TGIF1	ENSG00000177426
hsa-miR-122-5p	CFLAR	ENSG00000003402
hsa-miR-122-5p	FAM118A	ENSG00000100376
hsa-miR-122-5p	ETV1	ENSG00000006468
hsa-miR-122-5p	PRDM15	ENSG00000141956
hsa-miR-122-5p	PIK3CG	ENSG00000105851
hsa-miR-122-5p	RPL5	ENSG00000122406
hsa-miR-122-5p	PRPF38B	ENSG00000134186
hsa-miR-122-5p	RORA	ENSG00000069667
hsa-miR-122-5p	IDH1	ENSG00000138413
hsa-miR-122-5p	PTPN11	ENSG00000179295
hsa-miR-122-5p	KLK13	ENSG00000167759
hsa-miR-122-5p	HSP90B1	ENSG00000166598
hsa-miR-122-5p	ZFAND6	ENSG00000086666
hsa-miR-122-5p	NPNT	ENSG00000168743
hsa-miR-122-5p	YLPM1	ENSG00000119596
hsa-miR-122-5p	YKT6	ENSG00000106636
hsa-miR-122-5p	ERICH1	ENSG00000104714
hsa-miR-122-5p	GTF2H2	ENSG00000145736
hsa-miR-122-5p	CRELD1	ENSG00000163703
hsa-miR-122-5p	PRKAR2A	ENSG00000114302
hsa-miR-122-5p	RNPC3	ENSG00000185946
hsa-miR-122-5p	SLC25A36	ENSG00000114120
hsa-miR-122-5p	ZNF708	ENSG00000182141
hsa-miR-122-5p	VTI1A	ENSG00000151532
hsa-miR-122-5p	C4orf33	ENSG00000151470
hsa-miR-122-5p	NMT2	ENSG00000152465
hsa-miR-122-5p	C14orf39	ENSG00000179008
hsa-miR-122-5p	RAP2C	ENSG00000123728
hsa-miR-122-5p	SRRM2	ENSG00000167978
hsa-miR-122-5p	SS18L1	ENSG00000184402
hsa-miR-122-5p	CDK5RAP2	ENSG00000136861
hsa-miR-122-5p	RAD18	ENSG00000070950
hsa-miR-122-5p	SPTLC1	ENSG00000090054
hsa-miR-122-5p	FXR1	ENSG00000114416
hsa-miR-122-5p	TTLL3	ENSG00000214021
hsa-miR-122-5p	RAB6B	ENSG00000154917
hsa-miR-122-5p	EEF1A1	ENSG00000156508
hsa-miR-122-5p	CUX1	ENSG00000257923
hsa-miR-122-5p	RIMKLB	ENSG00000166532
hsa-miR-122-5p	OXTR	ENSG00000180914
hsa-miR-122-5p	POLR2J2	ENSG00000267645
hsa-miR-122-5p	LZTS2	ENSG00000107816
hsa-miR-122-5p	FBXO9	ENSG00000112146
hsa-miR-122-5p	TMEM256	ENSG00000205544
hsa-miR-122-5p	RAC1	ENSG00000136238
hsa-miR-122-5p	INSR	ENSG00000171105
hsa-miR-122-5p	MAPRE1	ENSG00000101367
hsa-miR-122-5p	ANKRD13C	ENSG00000118454
hsa-miR-122-5p	PRKAA1	ENSG00000132356
hsa-miR-122-5p	SOX6	ENSG00000110693
hsa-miR-122-5p	GPR135	ENSG00000181619
hsa-miR-122-5p	UBXN2A	ENSG00000173960
hsa-miR-122-5p	BEND7	ENSG00000165626
hsa-miR-122-5p	FGFR1OP2	ENSG00000111790
hsa-miR-122-5p	GPALPP1	ENSG00000133114
hsa-miR-122-5p	SEC61B	ENSG00000106803
hsa-miR-122-5p	UBE2K	ENSG00000078140
hsa-miR-122-5p	KDM6B	ENSG00000132510
hsa-miR-122-5p	CCDC152	ENSG00000198865
hsa-miR-122-5p	PEA15	ENSG00000162734
hsa-miR-122-5p	CLNS1A	ENSG00000074201
hsa-miR-122-5p	SH3RF1	ENSG00000154447
hsa-miR-122-5p	BCL2L2	ENSG00000129473
hsa-miR-122-5p	PPP1R9B	ENSG00000108819
hsa-miR-122-5p	SESN2	ENSG00000130766
hsa-miR-122-5p	PPDPF	ENSG00000125534
hsa-miR-122-5p	FGF18	ENSG00000156427
hsa-miR-122-5p	TRIO	ENSG00000038382
hsa-miR-122-5p	CNOT3	ENSG00000088038
hsa-miR-122-5p	PRSS1	ENSG00000204983
hsa-miR-122-5p	KIF11	ENSG00000138160
hsa-miR-122-5p	SRSF4	ENSG00000116350
hsa-miR-122-5p	FRYL	ENSG00000075539
hsa-miR-122-5p	PIK3C2A	ENSG00000011405
hsa-miR-122-5p	CHD2	ENSG00000173575
hsa-miR-122-5p	TSC22D2	ENSG00000196428
hsa-miR-122-5p	TTC14	ENSG00000163728
hsa-miR-122-5p	SNRPN	ENSG00000128739
hsa-miR-122-5p	IGF2BP3	ENSG00000136231
hsa-miR-122-5p	KIAA0247	ENSG00000100647
hsa-miR-122-5p	PHKA1	ENSG00000067177
hsa-miR-122-5p	BAG2	ENSG00000112208
hsa-miR-122-5p	MUC3A	ENSG00000169894
hsa-miR-122-5p	TRIM4	ENSG00000146833
hsa-miR-122-5p	PSMD10	ENSG00000101843
hsa-miR-122-5p	CALD1	ENSG00000122786
hsa-miR-122-5p	ZC3H11A	ENSG00000058673
hsa-miR-122-5p	NF1	ENSG00000196712
hsa-miR-122-5p	ZNF700	ENSG00000196757
hsa-miR-122-5p	PARP3	ENSG00000041880
hsa-miR-122-5p	ZNF430	ENSG00000118620
hsa-miR-122-5p	FZD1	ENSG00000157240
hsa-miR-122-5p	KDSR	ENSG00000119537
hsa-miR-122-5p	CDK13	ENSG00000065883
hsa-miR-122-5p	IPP	ENSG00000197429
hsa-miR-122-5p	UBAP2	ENSG00000137073
hsa-miR-122-5p	TMEM106C	ENSG00000134291
hsa-miR-122-5p	RANBP2	ENSG00000153201
hsa-miR-122-5p	DSG2	ENSG00000046604
hsa-miR-122-5p	ABCC3	ENSG00000108846
hsa-miR-122-5p	SPSB1	ENSG00000171621
hsa-miR-122-5p	Bcl-xL(hsa)	Bcl-xL(hsa)
hsa-miR-122-5p	WDR61	ENSG00000140395
hsa-miR-122-5p	SPAG11B	ENSG00000164871
hsa-miR-122-5p	FAM98A	ENSG00000119812
hsa-miR-122-5p	BNC2	ENSG00000173068
hsa-miR-122-5p	ARHGAP21	ENSG00000107863
hsa-miR-122-5p	MDM4	ENSG00000198625
hsa-miR-122-5p	OGFRL1	ENSG00000119900
hsa-miR-122-5p	SSR3	ENSG00000114850
hsa-miR-122-5p	PHOX2A	ENSG00000165462
hsa-miR-122-5p	BCL6	ENSG00000113916
hsa-miR-122-5p	DZIP1L	ENSG00000158163
hsa-miR-122-5p	OSTM1	ENSG00000081087
hsa-miR-122-5p	EHF	ENSG00000135373
hsa-miR-122-5p	ANKH	ENSG00000154122
hsa-miR-122-5p	FBXW12	ENSG00000164049
hsa-miR-122-5p	ONECUT2	ENSG00000119547
hsa-miR-122-5p	PPA2	ENSG00000138777
hsa-miR-122-5p	AKIRIN1	ENSG00000174574
hsa-miR-122-5p	TNRC18	ENSG00000182095
hsa-miR-122-5p	ZNF451	ENSG00000112200
hsa-miR-122-5p	ADARB2	ENSG00000185736
hsa-miR-122-5p	USP42	ENSG00000106346
hsa-miR-122-5p	ANAPC5	ENSG00000089053
hsa-miR-122-5p	MBNL2	ENSG00000139793
hsa-miR-122-5p	DOT1L	ENSG00000104885
hsa-miR-122-5p	CYP3A5	ENSG00000106258
hsa-miR-122-5p	SLC20A1	ENSG00000144136
hsa-miR-122-5p	PRKAB2	ENSG00000131791
hsa-miR-122-5p	RAI14	ENSG00000039560
hsa-miR-122-5p	RAB40C	ENSG00000197562
hsa-miR-122-5p	KCNJ2	ENSG00000123700
hsa-miR-122-5p	SFI1	ENSG00000198089
hsa-miR-122-5p	DNAJC18	ENSG00000170464
hsa-miR-122-5p	SLC22A15	ENSG00000163393
hsa-miR-122-5p	GSTM2	ENSG00000213366
hsa-miR-122-5p	PAXBP1	ENSG00000159086
hsa-miR-122-5p	PRKAR1A	ENSG00000108946
hsa-miR-122-5p	VMA21	ENSG00000160131
hsa-miR-122-5p	SAP30L	ENSG00000164576
hsa-miR-122-5p	NR2C1	ENSG00000120798
hsa-miR-122-5p	TRPC3	ENSG00000138741
hsa-miR-122-5p	MIDN	ENSG00000167470
hsa-miR-122-5p	RNF165	ENSG00000141622
hsa-miR-122-5p	TMEFF2	ENSG00000144339
hsa-miR-122-5p	AHSA2	ENSG00000173209
hsa-miR-122-5p	PPHLN1	ENSG00000134283
hsa-miR-122-5p	MGEA5	ENSG00000198408
hsa-miR-122-5p	OFD1	ENSG00000046651
hsa-miR-122-5p	SLC44A1	ENSG00000070214
hsa-miR-122-5p	DCUN1D1	ENSG00000043093
hsa-miR-122-5p	FBXO7	ENSG00000100225
hsa-miR-122-5p	ANK1	ENSG00000029534
hsa-miR-122-5p	RPL39	ENSG00000198918
hsa-miR-122-5p	GNAQ	ENSG00000156052
hsa-miR-122-5p	ZBTB7A	ENSG00000178951
hsa-miR-122-5p	TRMT10B	ENSG00000165275
hsa-miR-122-5p	REV3L	ENSG00000009413
hsa-miR-122-5p	RASEF	ENSG00000165105
hsa-miR-122-5p	OSBPL10	ENSG00000144645
hsa-miR-122-5p	PSMD7	ENSG00000103035
hsa-miR-122-5p	CELSR3	ENSG00000008300
hsa-miR-122-5p	RP11-169K16.9.1	ENSG00000179743
hsa-miR-122-5p	PIAS2	ENSG00000078043
hsa-miR-122-5p	RHBDF2	ENSG00000129667
hsa-miR-122-5p	ATF7IP	ENSG00000171681
hsa-miR-122-5p	C18orf54	ENSG00000166845
hsa-miR-122-5p	NLRC5	ENSG00000140853
hsa-miR-122-5p	HERC4	ENSG00000148634
hsa-miR-122-5p	STARD13	ENSG00000133121
hsa-miR-122-5p	PDE4C	ENSG00000105650
hsa-miR-122-5p	ATXN7	ENSG00000163635
hsa-miR-122-5p	SCAF11	ENSG00000139218
hsa-miR-122-5p	CYB561	ENSG00000008283
hsa-miR-122-5p	PLK1S1	ENSG00000088970
hsa-miR-122-5p	BCL7A	ENSG00000110987
hsa-miR-122-5p	RABGEF1	ENSG00000154710
hsa-miR-122-5p	CTSB	ENSG00000164733
hsa-miR-122-5p	FOXP2	ENSG00000128573
hsa-miR-122-5p	BIVM	ENSG00000134897
hsa-miR-122-5p	BRD1	ENSG00000100425
hsa-miR-122-5p	MPHOSPH9	ENSG00000051825
hsa-miR-122-5p	CAPN1	ENSG00000014216
hsa-miR-122-5p	ACACB	ENSG00000076555
hsa-miR-122-5p	EML2	ENSG00000125746
hsa-miR-122-5p	CNN3	ENSG00000117519
hsa-miR-122-5p	DFNB59	ENSG00000204311
hsa-miR-122-5p	GAPVD1	ENSG00000165219
hsa-miR-122-5p	PAPD4	ENSG00000164329
hsa-miR-122-5p	BRPF1	ENSG00000156983
hsa-miR-122-5p	FAM214B	ENSG00000005238
hsa-miR-122-5p	JUND	ENSG00000130522
hsa-miR-122-5p	PCDH7	ENSG00000169851
hsa-miR-122-5p	PRKAG2	ENSG00000106617
hsa-miR-122-5p	SUZ12	ENSG00000178691
hsa-miR-122-5p	RAB26	ENSG00000167964
hsa-miR-122-5p	TRAPPC10	ENSG00000160218
hsa-miR-122-5p	CCNE1	ENSG00000105173
hsa-miR-122-5p	ABCA5	ENSG00000154265
hsa-miR-122-5p	TLL1	ENSG00000038295
hsa-miR-122-5p	NMNAT1	ENSG00000173614
hsa-miR-122-5p	AKAP13	ENSG00000170776
hsa-miR-122-5p	GNB2L1	ENSG00000204628
hsa-miR-122-5p	SLC16A7	ENSG00000118596
hsa-miR-122-5p	A2M	ENSG00000175899
hsa-miR-122-5p	EIF3M	ENSG00000149100
hsa-miR-122-5p	MYO10	ENSG00000145555
hsa-miR-122-5p	AP1AR	ENSG00000138660
hsa-miR-122-5p	TAF1C	ENSG00000103168
hsa-miR-122-5p	SPG21	ENSG00000090487
hsa-miR-122-5p	C5orf24	ENSG00000181904
hsa-miR-122-5p	NCDN	ENSG00000020129
hsa-miR-122-5p	CYP1B1	ENSG00000138061
hsa-miR-122-5p	NUP54	ENSG00000138750
hsa-miR-122-5p	CEP162	ENSG00000135315
hsa-miR-122-5p	RLIM	ENSG00000131263
hsa-miR-122-5p	THOC2	ENSG00000125676
hsa-miR-122-5p	FUBP1	ENSG00000162613
hsa-miR-122-5p	SNW1	ENSG00000100603
hsa-miR-122-5p	FAM102A	ENSG00000167106
hsa-miR-122-5p	KMT2A	ENSG00000118058
hsa-miR-122-5p	CEP95	ENSG00000258890
hsa-miR-122-5p	GLOD4	ENSG00000167699
hsa-miR-122-5p	ZNF573	ENSG00000189144
hsa-miR-122-5p	AKAP10	ENSG00000108599
hsa-miR-122-5p	EFCAB6	ENSG00000186976
hsa-miR-122-5p	KLHDC4	ENSG00000104731
hsa-miR-122-5p	RPS10	ENSG00000124614
hsa-miR-122-5p	TPP1	ENSG00000166340
hsa-miR-122-5p	UBN1	ENSG00000118900
hsa-miR-122-5p	SEC22C	ENSG00000093183
hsa-miR-122-5p	MECOM	ENSG00000085276
hsa-miR-122-5p	MZT2B	ENSG00000152082
hsa-miR-122-5p	DHX9	ENSG00000135829
hsa-miR-122-5p	ANKRD28	ENSG00000206560
hsa-miR-122-5p	ABLIM1	ENSG00000099204
hsa-miR-122-5p	IFFO1	ENSG00000010295
hsa-miR-122-5p	BCL2A1	ENSG00000140379
hsa-miR-122-5p	GATAD2B	ENSG00000143614
hsa-miR-122-5p	HO-1(hsa)	HO-1(hsa)
hsa-miR-122-5p	PXDN	ENSG00000130508
hsa-miR-122-5p	SENP7	ENSG00000138468
hsa-miR-122-5p	PKN2	ENSG00000065243
hsa-miR-122-5p	SEMA4D	ENSG00000187764
hsa-miR-122-5p	GJA1	ENSG00000152661
hsa-miR-122-5p	ENPP5	ENSG00000112796
hsa-miR-122-5p	CALR	ENSG00000179218
hsa-miR-122-5p	ASTN2	ENSG00000148219
hsa-miR-122-5p	PYGO1	ENSG00000171016
hsa-miR-122-5p	BCLAF1	ENSG00000029363
hsa-miR-122-5p	CATSPER2	ENSG00000166762
hsa-miR-122-5p	POFUT1	ENSG00000101346
hsa-miR-122-5p	CDY2B	ENSG00000129873
hsa-miR-122-5p	NAPEPLD	ENSG00000161048
hsa-miR-122-5p	KIAA0232	ENSG00000170871
hsa-miR-122-5p	SYNE2	ENSG00000054654
hsa-miR-122-5p	RBM41	ENSG00000089682
hsa-miR-122-5p	CLSPN	ENSG00000092853
hsa-miR-122-5p	CDC42EP3	ENSG00000163171
hsa-miR-122-5p	IQCA1	ENSG00000132321
hsa-miR-122-5p	DOCK9	ENSG00000088387
hsa-miR-122-5p	TNRC6A	ENSG00000090905
hsa-miR-122-5p	MDN1	ENSG00000112159
hsa-miR-122-5p	COL8A1	ENSG00000144810
hsa-miR-122-5p	RNF170	ENSG00000120925
hsa-miR-122-5p	MBNL1	ENSG00000152601
hsa-miR-122-5p	ISL1	ENSG00000016082
hsa-miR-122-5p	WDR4	ENSG00000160193
hsa-miR-122-5p	APOPT1	ENSG00000256053
hsa-miR-122-5p	TMEM201	ENSG00000188807
hsa-miR-122-5p	PDXDC1	ENSG00000179889
hsa-miR-122-5p	SRSF11	ENSG00000116754
hsa-miR-122-5p	LTBP1	ENSG00000049323
hsa-miR-122-5p	MKNK1	ENSG00000079277
hsa-miR-122-5p	AVL9	ENSG00000105778
hsa-miR-122-5p	ZCCHC7	ENSG00000147905
hsa-miR-122-5p	KIAA1919	ENSG00000173214
hsa-miR-122-5p	RASAL2	ENSG00000075391
hsa-miR-122-5p	PRKD3	ENSG00000115825
hsa-miR-122-5p	ATG9A	ENSG00000198925
hsa-miR-122-5p	GABRE	ENSG00000102287
hsa-miR-122-5p	MLXIP	ENSG00000175727
hsa-miR-122-5p	SYTL4	ENSG00000102362
hsa-miR-122-5p	VGLL4	ENSG00000144560
hsa-miR-122-5p	TGIF2	ENSG00000118707
hsa-miR-122-5p	DAND5	ENSG00000179284
hsa-miR-122-5p	TMEM25	ENSG00000149582
hsa-miR-122-5p	NAA25	ENSG00000111300
hsa-miR-122-5p	PDPK1	ENSG00000140992
hsa-miR-122-5p	PFKFB2	ENSG00000123836
hsa-miR-122-5p	ZCCHC8	ENSG00000033030
hsa-miR-122-5p	TTI1	ENSG00000101407
hsa-miR-122-5p	TNPO2	ENSG00000105576
hsa-miR-122-5p	ZBTB4	ENSG00000174282
hsa-miR-122-5p	PTPN12	ENSG00000127947
hsa-miR-122-5p	EXOSC6	ENSG00000223496
hsa-miR-122-5p	GTF3C6	ENSG00000155115
hsa-miR-122-5p	BCOR	ENSG00000183337
hsa-miR-122-5p	LIMA1	ENSG00000050405
hsa-miR-122-5p	CUL3	ENSG00000036257
hsa-miR-122-5p	ADAM33	ENSG00000149451
hsa-miR-122-5p	HNRNPL	ENSG00000104824
hsa-miR-122-5p	SLC25A27	ENSG00000153291
hsa-miR-122-5p	RUFY2	ENSG00000204130
hsa-miR-122-5p	GPM6B	ENSG00000046653
hsa-miR-122-5p	PCBP2	ENSG00000197111
hsa-miR-122-5p	LUZP1	ENSG00000169641
hsa-miR-122-5p	RP11-20I23.8	ENSG00000261613
hsa-miR-122-5p	KCTD15	ENSG00000153885
hsa-miR-122-5p	AP1G1	ENSG00000166747
hsa-miR-122-5p	ORC6	ENSG00000091651
hsa-miR-122-5p	E2F4	ENSG00000205250
hsa-miR-122-5p	CYCS	ENSG00000172115
hsa-miR-122-5p	PLEKHH1	ENSG00000054690
hsa-miR-122-5p	CEP55	ENSG00000138180
hsa-miR-122-5p	VMP1	ENSG00000062716
hsa-miR-122-5p	MKNK2	ENSG00000099875
hsa-miR-122-5p	SETD6	ENSG00000103037
hsa-miR-122-5p	FANCA	ENSG00000187741
hsa-miR-122-5p	RHBDD1	ENSG00000144468
hsa-miR-122-5p	PDE7A	ENSG00000205268
hsa-miR-122-5p	MFGE8	ENSG00000140545
hsa-miR-122-5p	MTOR	ENSG00000198793
hsa-miR-122-5p	GYS1	ENSG00000104812
hsa-miR-122-5p	ARHGEF7	ENSG00000102606
hsa-miR-122-5p	C11orf31	ENSG00000211450
hsa-miR-122-5p	PIEZO1	ENSG00000103335
hsa-miR-122-5p	SDCCAG8	ENSG00000054282
hsa-miR-122-5p	PLEKHA6	ENSG00000143850
hsa-miR-122-5p	AURKB	ENSG00000178999
hsa-miR-122-5p	NASP	ENSG00000132780
hsa-miR-122-5p	TTC27	ENSG00000018699
hsa-miR-122-5p	ZNF500	ENSG00000103199
hsa-miR-122-5p	CRCP	ENSG00000241258
hsa-miR-122-5p	TRAPPC13	ENSG00000113597
hsa-miR-122-5p	ALDOA	ENSG00000149925
hsa-miR-122-5p	TMX3	ENSG00000166479
hsa-miR-122-5p	PHF11	ENSG00000136147
hsa-miR-122-5p	LAMP1	ENSG00000185896
hsa-miR-122-5p	DENND2C	ENSG00000175984
hsa-miR-122-5p	TMEM44	ENSG00000145014
hsa-miR-122-5p	CEP164	ENSG00000110274
hsa-miR-122-5p	METTL3	ENSG00000165819
hsa-miR-122-5p	PRKRA	ENSG00000180228
hsa-miR-122-5p	RPL22	ENSG00000116251
hsa-miR-122-5p	SCRN3	ENSG00000144306
hsa-miR-122-5p	U2AF1	ENSG00000160201
hsa-miR-122-5p	ZNF518A	ENSG00000177853
hsa-miR-122-5p	XRCC5	ENSG00000079246
hsa-miR-122-5p	KMT2E	ENSG00000005483
hsa-miR-122-5p	SYMPK	ENSG00000125755
hsa-miR-122-5p	RSBN1	ENSG00000081019
hsa-miR-122-5p	ZNF22	ENSG00000165512
hsa-miR-122-5p	CBR4	ENSG00000145439
hsa-miR-122-5p	VAV3	ENSG00000134215
hsa-miR-122-5p	LSM14B	ENSG00000149657
hsa-miR-122-5p	SPG7	ENSG00000197912
hsa-miR-122-5p	ZNF618	ENSG00000157657
hsa-miR-122-5p	ATP8B1	ENSG00000081923
hsa-miR-122-5p	TANC2	ENSG00000170921
hsa-miR-122-5p	RRBP1	ENSG00000125844
hsa-miR-122-5p	CSAD	ENSG00000139631
hsa-miR-122-5p	SCNN1A	ENSG00000111319
hsa-miR-122-5p	GOPC	ENSG00000047932
hsa-miR-122-5p	APBB2	ENSG00000163697
hsa-miR-122-5p	SLC52A2	ENSG00000185803
hsa-miR-122-5p	FGFR1	ENSG00000077782
hsa-miR-122-5p	EWSR1	ENSG00000182944
hsa-miR-122-5p	PALLD	ENSG00000129116
hsa-miR-122-5p	UBE2L3	ENSG00000185651
hsa-miR-122-5p	CMTM7	ENSG00000153551
hsa-miR-122-5p	SPTBN1	ENSG00000115306
hsa-miR-122-5p	DALRD3	ENSG00000178149
hsa-miR-122-5p	TMEM216	ENSG00000187049
hsa-miR-122-5p	UBALD2	ENSG00000185262
hsa-miR-122-5p	SCN11A	ENSG00000168356
hsa-miR-122-5p	NFIC	ENSG00000141905
hsa-miR-122-5p	SOX2	ENSG00000181449
hsa-miR-122-5p	RNF213	ENSG00000173821
hsa-miR-122-5p	EMC1	ENSG00000127463
hsa-miR-122-5p	MRPS36	ENSG00000134056
hsa-miR-122-5p	CTPS1	ENSG00000171793
hsa-miR-122-5p	BBX	ENSG00000114439
hsa-miR-122-5p	MUM1	ENSG00000160953
hsa-miR-122-5p	CXCL9	ENSG00000138755
hsa-miR-122-5p	EXOC7	ENSG00000182473
hsa-miR-122-5p	ATP13A3	ENSG00000133657
hsa-miR-122-5p	AZI2	ENSG00000163512
hsa-miR-122-5p	NIPBL	ENSG00000164190
hsa-miR-122-5p	OSCAR	ENSG00000170909
hsa-miR-122-5p	PHOSPHO2	ENSG00000144362
hsa-miR-122-5p	POMGNT2	ENSG00000144647
hsa-miR-122-5p	NUPL1	ENSG00000139496
hsa-miR-122-5p	MTMR3	ENSG00000100330
hsa-miR-122-5p	METTL7A	ENSG00000185432
hsa-miR-122-5p	MICAL3	ENSG00000243156
hsa-miR-122-5p	DCLK1	ENSG00000133083
hsa-miR-122-5p	LATS2	ENSG00000150457
hsa-miR-122-5p	UACA	ENSG00000137831
hsa-miR-122-5p	MED6	ENSG00000133997
hsa-miR-122-5p	CHD9	ENSG00000177200
hsa-miR-122-5p	ABL2	ENSG00000143322
hsa-miR-122-5p	USP33	ENSG00000077254
hsa-miR-122-5p	RAD21	ENSG00000164754
hsa-miR-122-5p	HECTD4	ENSG00000173064
hsa-miR-122-5p	GANC	ENSG00000214013
hsa-miR-122-5p	ARHGEF4	ENSG00000136002
hsa-miR-122-5p	KMT2C	ENSG00000055609
hsa-miR-122-5p	LPCAT3	ENSG00000111684
hsa-miR-122-5p	GGA1	ENSG00000100083
hsa-miR-122-5p	SCN1B	ENSG00000105711
hsa-miR-122-5p	GTSE1	ENSG00000075218
hsa-miR-122-5p	RBM6	ENSG00000004534
hsa-miR-122-5p	SPIRE2	ENSG00000204991
hsa-miR-122-5p	PCDH9	ENSG00000184226
hsa-miR-122-5p	KATNAL1	ENSG00000102781
hsa-miR-122-5p	DLGAP4	ENSG00000080845
hsa-miR-122-5p	SLFN5	ENSG00000166750
hsa-miR-122-5p	SMAD1	ENSG00000170365
hsa-miR-122-5p	TMEM136	ENSG00000181264
hsa-miR-122-5p	PATL1	ENSG00000166889
hsa-miR-122-5p	PNPLA3	ENSG00000100344
hsa-miR-122-5p	ZNF567	ENSG00000189042
hsa-miR-122-5p	ENTPD4	ENSG00000197217
hsa-miR-122-5p	CBX3	ENSG00000122565
hsa-miR-122-5p	SPDYE1	ENSG00000136206
hsa-miR-122-5p	TMEM74	ENSG00000164841
hsa-miR-122-5p	ANKRD10	ENSG00000088448
hsa-miR-122-5p	RELL1	ENSG00000181826
hsa-miR-122-5p	EID3	ENSG00000255150
hsa-miR-122-5p	KCNRG	ENSG00000198553
hsa-miR-122-5p	ZNF675	ENSG00000197372
hsa-miR-122-5p	GPR161	ENSG00000143147
hsa-miR-122-5p	RBM4	ENSG00000173933
hsa-miR-122-5p	ZNF30	ENSG00000168661
hsa-miR-122-5p	BRWD1	ENSG00000185658
hsa-miR-122-5p	CBX5	ENSG00000094916
hsa-miR-122-5p	OTUB2	ENSG00000089723
hsa-miR-122-5p	CDK10	ENSG00000185324
hsa-miR-122-5p	TBL1XR1	ENSG00000177565
hsa-miR-122-5p	DNASE1	ENSG00000213918
hsa-miR-122-5p	ZNF165	ENSG00000197279
hsa-miR-122-5p	DHX36	ENSG00000174953
hsa-miR-122-5p	ASXL2	ENSG00000143970
hsa-miR-122-5p	SLC1A5	ENSG00000105281
hsa-miR-122-5p	C15orf40	ENSG00000169609
hsa-miR-122-5p	PTCD3	ENSG00000132300
hsa-miR-122-5p	ZNF641	ENSG00000167528
hsa-miR-122-5p	PON2	ENSG00000105854
hsa-miR-122-5p	USP10	ENSG00000103194
hsa-miR-122-5p	SNRNP200	ENSG00000144028
hsa-miR-122-5p	TMEM260	ENSG00000070269
hsa-miR-122-5p	ZBTB47	ENSG00000114853
hsa-miR-122-5p	RAPH1	ENSG00000173166
hsa-miR-122-5p	RBM15	ENSG00000162775
hsa-miR-122-5p	PPP1R3E	ENSG00000235194
hsa-miR-122-5p	CLK4	ENSG00000113240
hsa-miR-122-5p	CAMK2N1	ENSG00000162545
hsa-miR-122-5p	AKAP11	ENSG00000023516
hsa-miR-122-5p	MTHFSD	ENSG00000103248
hsa-miR-122-5p	FRG1B	ENSG00000149531
hsa-miR-122-5p	MTDH	ENSG00000147649
hsa-miR-122-5p	PRR11	ENSG00000068489
hsa-miR-122-5p	SLC35E2B	ENSG00000189339
hsa-miR-122-5p	SCFD1	ENSG00000092108
hsa-miR-122-5p	KIAA1033	ENSG00000136051
hsa-miR-122-5p	PLCB4	ENSG00000101333
hsa-miR-122-5p	SYVN1	ENSG00000162298
hsa-miR-122-5p	TRIM38	ENSG00000112343
hsa-miR-122-5p	RABL6	ENSG00000196642
hsa-miR-122-5p	MYLK	ENSG00000065534
hsa-miR-122-5p	EIF4A1	ENSG00000161960
hsa-miR-122-5p	FAM110C	ENSG00000184731
hsa-miR-122-5p	NA	ENSG00000218759
hsa-miR-122-5p	MRPS31	ENSG00000102738
hsa-miR-122-5p	NEAT1	ENSG00000245532
hsa-miR-122-5p	CXorf56	ENSG00000018610
hsa-miR-122-5p	KIAA1551	ENSG00000174718
hsa-miR-122-5p	PNISR	ENSG00000132424
hsa-miR-122-5p	FLVCR1	ENSG00000162769
hsa-miR-122-5p	TOR1AIP1	ENSG00000143337
hsa-miR-122-5p	ADAMTS6	ENSG00000049192
hsa-miR-122-5p	BCL2L11	ENSG00000153094
hsa-miR-122-5p	KBTBD7	ENSG00000120696
hsa-miR-122-5p	XRCC2	ENSG00000196584
hsa-miR-122-5p	LRRC37A2	ENSG00000238083
hsa-miR-122-5p	TBRG1	ENSG00000154144
hsa-miR-122-5p	TMEM154	ENSG00000170006
hsa-miR-122-5p	NCOA1	ENSG00000084676
hsa-miR-122-5p	LMO4	ENSG00000143013
hsa-miR-122-5p	ZHX3	ENSG00000174306
hsa-miR-122-5p	SOBP	ENSG00000112320
hsa-miR-122-5p	HCCS	ENSG00000004961
hsa-miR-122-5p	JAG2	ENSG00000184916
hsa-miR-122-5p	RPS6KB1	ENSG00000108443
hsa-miR-122-5p	NSUN6	ENSG00000241058
hsa-miR-122-5p	USP34	ENSG00000115464
hsa-miR-122-5p	CD44	ENSG00000026508
hsa-miR-122-5p	ATP5C1	ENSG00000165629
hsa-miR-122-5p	MAP1B	ENSG00000131711
hsa-miR-122-5p	TMF1	ENSG00000144747
hsa-miR-122-5p	MIER3	ENSG00000155545
hsa-miR-122-5p	EIF3C	ENSG00000184110
hsa-miR-122-5p	MDH1	ENSG00000014641
hsa-miR-122-5p	HHAT	ENSG00000054392
hsa-miR-122-5p	UBR4	ENSG00000127481
hsa-miR-122-5p	ZKSCAN1	ENSG00000106261
hsa-miR-122-5p	NLGN3	ENSG00000196338
hsa-miR-122-5p	CDC25A	ENSG00000164045
hsa-miR-122-5p	POLH	ENSG00000170734
hsa-miR-122-5p	ANAPC16	ENSG00000166295
hsa-miR-122-5p	C2orf43	ENSG00000118961
hsa-miR-122-5p	PEX1	ENSG00000127980
hsa-miR-122-5p	ZNF213	ENSG00000085644
hsa-miR-122-5p	SPRY2	ENSG00000136158
hsa-miR-122-5p	KNOP1	ENSG00000103550
hsa-miR-122-5p	YTHDC1	ENSG00000083896
hsa-miR-122-5p	SCMH1	ENSG00000010803
hsa-miR-122-5p	TOR3A	ENSG00000186283
hsa-miR-122-5p	EIF3I	ENSG00000084623
hsa-miR-122-5p	INO80D	ENSG00000114933
hsa-miR-122-5p	IL6R	ENSG00000160712
hsa-miR-122-5p	GSPT1	ENSG00000103342
hsa-miR-122-5p	PILRB	ENSG00000121716
hsa-miR-122-5p	TBC1D22B	ENSG00000065491
hsa-miR-122-5p	OTUD7B	ENSG00000264522
hsa-miR-122-5p	CFHR2	ENSG00000080910
hsa-miR-122-5p	SRGAP2	ENSG00000266028
hsa-miR-122-5p	NBPF10	ENSG00000271425
hsa-miR-122-5p	MARCKS	ENSG00000277443
hsa-miR-122-5p	CISD3	ENSG00000277972
hsa-miR-122-5p	ZNF160	ENSG00000170949
hsa-miR-122-5p	PIGY	ENSG00000255072
hsa-miR-122-5p	SLC6A14	ENSG00000268104
hsa-miR-122-5p	MYO19	ENSG00000278259
hsa-miR-122-5p	TMEM189-UBE2V1	ENSG00000124208
hsa-miR-122-5p	NBPF12	ENSG00000268043
hsa-miR-122-5p	SRSF8	ENSG00000263465
hsa-miR-122-5p	ACACA	ENSG00000278540
hsa-miR-122-5p	TAF15	ENSG00000270647
hsa-miR-122-5p	ANKRD20A1	ENSG00000260691
hsa-miR-122-5p	CDRT4	ENSG00000239704
hsa-miR-122-5p	MLLT6	ENSG00000275023
hsa-miR-122-5p	CWC25	ENSG00000273559
hsa-miR-122-5p	ZNF280B	ENSG00000275004
hsa-miR-122-5p	RNF115	ENSG00000265491
hsa-miR-122-5p	ZNF28	ENSG00000198538
hsa-miR-122-5p	ZNF321P	ENSG00000221874
hsa-miR-192-5p	FZD7	ENSG00000155760
hsa-miR-192-5p	EFNB2	ENSG00000125266
hsa-miR-192-5p	CTNNBIP1	ENSG00000178585
hsa-miR-192-5p	WWC2	ENSG00000151718
hsa-miR-192-5p	C10orf6(hsa)	C10orf6(hsa)
hsa-miR-192-5p	COPS7A	ENSG00000111652
hsa-miR-192-5p	B2M	ENSG00000166710
hsa-miR-192-5p	HSS00104143(hsa)	HSS00104143(hsa)
hsa-miR-192-5p	PPP1CA	ENSG00000172531
hsa-miR-192-5p	TRIB3	ENSG00000101255
hsa-miR-192-5p	ABCB10	ENSG00000135776
hsa-miR-192-5p	RPA1	ENSG00000132383
hsa-miR-192-5p	VPS13C	ENSG00000129003
hsa-miR-192-5p	SRRT	ENSG00000087087
hsa-miR-192-5p	C16orf52	ENSG00000185716
hsa-miR-192-5p	FBXO5	ENSG00000112029
hsa-miR-192-5p	BUD13	ENSG00000137656
hsa-miR-192-5p	POU2F1	ENSG00000143190
hsa-miR-192-5p	UBASH3B	ENSG00000154127
hsa-miR-192-5p	ACTB	ENSG00000075624
hsa-miR-192-5p	EAF1	ENSG00000144597
hsa-miR-192-5p	HSPA2	ENSG00000126803
hsa-miR-192-5p	PRLR	ENSG00000113494
hsa-miR-192-5p	AF086032(hsa)	AF086032(hsa)
hsa-miR-192-5p	FBXO25	ENSG00000147364
hsa-miR-192-5p	DCP1A	ENSG00000272886
hsa-miR-192-5p	EGR1	ENSG00000120738
hsa-miR-192-5p	HSS00330832(hsa)	HSS00330832(hsa)
hsa-miR-192-5p	FOS	ENSG00000170345
hsa-miR-192-5p	RAB8A	ENSG00000167461
hsa-miR-192-5p	Contig43200_RC(hsa)	Contig43200_RC(hsa)
hsa-miR-192-5p	ZEB2	ENSG00000169554
hsa-miR-192-5p	MLK4	ENSG00000143674
hsa-miR-192-5p	ZMAT3	ENSG00000172667
hsa-miR-192-5p	TROAP	ENSG00000135451
hsa-miR-192-5p	HIPK2	ENSG00000064393
hsa-miR-192-5p	BC002811(hsa)	BC002811(hsa)
hsa-miR-192-5p	EDRF1	ENSG00000107938
hsa-miR-192-5p	hCT1770636.1(hsa)	hCT1770636.1(hsa)
hsa-miR-192-5p	C5orf30	ENSG00000181751
hsa-miR-192-5p	CREBL2	ENSG00000111269
hsa-miR-192-5p	Contig11417_RC(hsa)	Contig11417_RC(hsa)
hsa-miR-192-5p	HBEGF	ENSG00000113070
hsa-miR-192-5p	CHST12	ENSG00000136213
hsa-miR-192-5p	IL1RAP	ENSG00000196083
hsa-miR-192-5p	OTUD1	ENSG00000165312
hsa-miR-192-5p	DTL	ENSG00000143476
hsa-miR-192-5p	KDM1B	ENSG00000165097
hsa-miR-192-5p	hCT1641762.3(hsa)	hCT1641762.3(hsa)
hsa-miR-192-5p	PHF19	ENSG00000119403
hsa-miR-192-5p	NFKBIZ	ENSG00000144802
hsa-miR-192-5p	NOL12	ENSG00000273899
hsa-miR-192-5p	RBM27	ENSG00000091009
hsa-miR-192-5p	ENC1	ENSG00000171617
hsa-miR-192-5p	TUBGCP3	ENSG00000126216
hsa-miR-192-5p	TRIM68	ENSG00000167333
hsa-miR-192-5p	B3GNT5	ENSG00000176597
hsa-miR-192-5p	MAN2A2	ENSG00000196547
hsa-miR-192-5p	NUFIP1	ENSG00000083635
hsa-miR-192-5p	TNPO1	ENSG00000083312
hsa-miR-192-5p	hCT1648208.3(hsa)	hCT1648208.3(hsa)
hsa-miR-192-5p	KIAA1333(hsa)	KIAA1333(hsa)
hsa-miR-192-5p	ARFGEF1	ENSG00000066777
hsa-miR-192-5p	C8orf46	ENSG00000169085
hsa-miR-192-5p	ELL2	ENSG00000118985
hsa-miR-192-5p	KIAA1958	ENSG00000165185
hsa-miR-192-5p	FZD5	ENSG00000163251
hsa-miR-192-5p	G3BP1	ENSG00000145907
hsa-miR-192-5p	HSPA1A	ENSG00000204389
hsa-miR-192-5p	AK095096(hsa)	AK095096(hsa)
hsa-miR-192-5p	CTH	ENSG00000116761
hsa-miR-192-5p	NM_020962(hsa)	NM_020962(hsa)
hsa-miR-192-5p	TMTC2	ENSG00000179104
hsa-miR-192-5p	CDON	ENSG00000064309
hsa-miR-192-5p	KIAA1731	ENSG00000166004
hsa-miR-192-5p	VASH2	ENSG00000143494
hsa-miR-192-5p	TCEB3	ENSG00000011007
hsa-miR-192-5p	OTUD3	ENSG00000169914
hsa-miR-192-5p	APEX1	ENSG00000100823
hsa-miR-192-5p	ANKRD13A	ENSG00000076513
hsa-miR-192-5p	ACADSB	ENSG00000196177
hsa-miR-192-5p	hCG_1790474(hsa)	hCG_1790474(hsa)
hsa-miR-192-5p	LEPROTL1	ENSG00000104660
hsa-miR-192-5p	HYLS1	ENSG00000198331
hsa-miR-192-5p	PCOLCE2	ENSG00000163710
hsa-miR-192-5p	S100A16	ENSG00000188643
hsa-miR-192-5p	ATP6V0E1	ENSG00000113732
hsa-miR-192-5p	KIF14	ENSG00000118193
hsa-miR-192-5p	TROVE2	ENSG00000116747
hsa-miR-192-5p	SLC39A8	ENSG00000138821
hsa-miR-192-5p	GALNTL6	ENSG00000174473
hsa-miR-192-5p	C14orf1	ENSG00000133935
hsa-miR-192-5p	ZNF273	ENSG00000198039
hsa-miR-192-5p	TBL1X	ENSG00000101849
hsa-miR-192-5p	MYB	ENSG00000118513
hsa-miR-192-5p	HNF1B	ENSG00000108753
hsa-miR-192-5p	ID2	ENSG00000115738
hsa-miR-192-5p	BORA	ENSG00000136122
hsa-miR-192-5p	ITGB1	ENSG00000150093
hsa-miR-192-5p	KRT18P8(hsa)	KRT18P8(hsa)
hsa-miR-192-5p	MED13L	ENSG00000123066
hsa-miR-192-5p	PCSK9	ENSG00000169174
hsa-miR-192-5p	STOX2	ENSG00000173320
hsa-miR-192-5p	PET112	ENSG00000059691
hsa-miR-192-5p	POLR1C	ENSG00000171453
hsa-miR-192-5p	NUCB2	ENSG00000070081
hsa-miR-192-5p	NDFIP2	ENSG00000102471
hsa-miR-192-5p	DDHD1	ENSG00000100523
hsa-miR-192-5p	IL1R1	ENSG00000115594
hsa-miR-192-5p	ZDHHC23	ENSG00000184307
hsa-miR-192-5p	TRIM23	ENSG00000113595
hsa-miR-192-5p	GATM	ENSG00000171766
hsa-miR-192-5p	TOMM40	ENSG00000130204
hsa-miR-192-5p	Contig37200_RC(hsa)	Contig37200_RC(hsa)
hsa-miR-192-5p	Contig37920_RC(hsa)	Contig37920_RC(hsa)
hsa-miR-192-5p	ZBTB38	ENSG00000177311
hsa-miR-192-5p	RB1CC1	ENSG00000023287
hsa-miR-192-5p	hCT1819827.1(hsa)	hCT1819827.1(hsa)
hsa-miR-192-5p	AK095149(hsa)	AK095149(hsa)
hsa-miR-192-5p	WDR47	ENSG00000085433
hsa-miR-192-5p	THEM6	ENSG00000130193
hsa-miR-192-5p	MCM9	ENSG00000111877
hsa-miR-192-5p	SAYSD1	ENSG00000112167
hsa-miR-192-5p	TCERG1	ENSG00000113649
hsa-miR-192-5p	MAPK8IP2	ENSG00000008735
hsa-miR-192-5p	FAM126B	ENSG00000155744
hsa-miR-192-5p	PWWP2A	ENSG00000170234
hsa-miR-192-5p	RHOBTB3	ENSG00000164292
hsa-miR-192-5p	CMPK2	ENSG00000134326
hsa-miR-192-5p	NM_020467(hsa)	NM_020467(hsa)
hsa-miR-192-5p	DDX50	ENSG00000107625
hsa-miR-192-5p	IGFN1	ENSG00000163395
hsa-miR-192-5p	NUCKS1	ENSG00000069275
hsa-miR-192-5p	GPR137B	ENSG00000077585
hsa-miR-192-5p	BLM	ENSG00000197299
hsa-miR-192-5p	RP11-11C5.2(hsa)	RP11-11C5.2(hsa)
hsa-miR-192-5p	RDH11	ENSG00000072042
hsa-miR-192-5p	ENST00000296531(hsa)	ENST00000296531(hsa)
hsa-miR-192-5p	AF086173(hsa)	AF086173(hsa)
hsa-miR-192-5p	KCTD12	ENSG00000178695
hsa-miR-192-5p	ATN1	ENSG00000111676
hsa-miR-192-5p	U79257(hsa)	U79257(hsa)
hsa-miR-192-5p	hCT2328509(hsa)	hCT2328509(hsa)
hsa-miR-192-5p	Contig30437_RC(hsa)	Contig30437_RC(hsa)
hsa-miR-192-5p	ESCO2	ENSG00000171320
hsa-miR-192-5p	EIF2AK3	ENSG00000172071
hsa-miR-192-5p	ALMS1	ENSG00000116127
hsa-miR-192-5p	ZNF611	ENSG00000213020
hsa-miR-192-5p	STAM	ENSG00000136738
hsa-miR-192-5p	PXDC1	ENSG00000168994
hsa-miR-192-5p	TTF2	ENSG00000116830
hsa-miR-192-5p	RNASEL	ENSG00000135828
hsa-miR-192-5p	SH2B3	ENSG00000111252
hsa-miR-192-5p	DICER1	ENSG00000100697
hsa-miR-192-5p	Contig54491_RC(hsa)	Contig54491_RC(hsa)
hsa-miR-192-5p	ARHGAP11A	ENSG00000198826
hsa-miR-192-5p	C19orf55	ENSG00000167595
hsa-miR-192-5p	OVOL1	ENSG00000172818
hsa-miR-192-5p	CASP7	ENSG00000165806
hsa-miR-192-5p	RBM12	ENSG00000244462
hsa-miR-192-5p	SMUG1	ENSG00000123415
hsa-miR-192-5p	ZBTB10	ENSG00000205189
hsa-miR-192-5p	ERICH5	ENSG00000177459
hsa-miR-192-5p	DNAJC19	ENSG00000205981
hsa-miR-192-5p	CAMK4	ENSG00000152495
hsa-miR-192-5p	TCFL5	ENSG00000101190
hsa-miR-192-5p	CCNO	ENSG00000152669
hsa-miR-192-5p	NM_024084(hsa)	NM_024084(hsa)
hsa-miR-192-5p	SLC37A3	ENSG00000157800
hsa-miR-192-5p	CRLF3	ENSG00000176390
hsa-miR-192-5p	PTBP2	ENSG00000117569
hsa-miR-192-5p	ADCY7	ENSG00000121281
hsa-miR-192-5p	DNAJC3	ENSG00000102580
hsa-miR-192-5p	ADRBK2	ENSG00000100077
hsa-miR-192-5p	UGGT1	ENSG00000136731
hsa-miR-192-5p	PRKAA2	ENSG00000162409
hsa-miR-192-5p	DIEXF	ENSG00000117597
hsa-miR-192-5p	RPL27	ENSG00000131469
hsa-miR-192-5p	DLG7(hsa)	DLG7(hsa)
hsa-miR-192-5p	CXorf57	ENSG00000147231
hsa-miR-192-5p	TMEM194A	ENSG00000166881
hsa-miR-192-5p	ARHGAP19	ENSG00000213390
hsa-miR-192-5p	SASS6	ENSG00000156876
hsa-miR-192-5p	WHSC1L1	ENSG00000147548
hsa-miR-192-5p	THUMPD3	ENSG00000134077
hsa-miR-192-5p	ATXN1L	ENSG00000224470
hsa-miR-192-5p	STK4	ENSG00000101109
hsa-miR-192-5p	PIWIL3	ENSG00000184571
hsa-miR-192-5p	PRRC1	ENSG00000164244
hsa-miR-192-5p	RSE_00000676604(hsa)	RSE_00000676604(hsa)
hsa-miR-192-5p	PIGX	ENSG00000163964
hsa-miR-192-5p	FEN1	ENSG00000168496
hsa-miR-192-5p	ELK4	ENSG00000158711
hsa-miR-192-5p	NRG4	ENSG00000169752
hsa-miR-192-5p	SAMHD1	ENSG00000101347
hsa-miR-192-5p	CDC14A	ENSG00000079335
hsa-miR-192-5p	HSS00018228(hsa)	HSS00018228(hsa)
hsa-miR-192-5p	PIF1	ENSG00000140451
hsa-miR-192-5p	RAB3D	ENSG00000105514
hsa-miR-192-5p	AF131846(hsa)	AF131846(hsa)
hsa-miR-192-5p	RMI1	ENSG00000178966
hsa-miR-192-5p	FAM111B	ENSG00000189057
hsa-miR-192-5p	COMMD7	ENSG00000149600
hsa-miR-192-5p	RIC8B	ENSG00000111785
hsa-miR-192-5p	PITPNC1	ENSG00000154217
hsa-miR-192-5p	Contig51252(hsa)	Contig51252(hsa)
hsa-miR-192-5p	GPATCH8	ENSG00000186566
hsa-miR-192-5p	UCK2	ENSG00000143179
hsa-miR-192-5p	DCAF8	ENSG00000132716
hsa-miR-192-5p	KLHL8	ENSG00000145332
hsa-miR-192-5p	GNAS	ENSG00000087460
hsa-miR-192-5p	CIB2	ENSG00000136425
hsa-miR-192-5p	TMED7	ENSG00000134970
hsa-miR-192-5p	PPAT	ENSG00000128059
hsa-miR-192-5p	EML1	ENSG00000066629
hsa-miR-192-5p	ENTPD5	ENSG00000187097
hsa-miR-192-5p	APC	ENSG00000134982
hsa-miR-192-5p	Contig40516_RC(hsa)	Contig40516_RC(hsa)
hsa-miR-192-5p	TAF9B	ENSG00000187325
hsa-miR-192-5p	CRK	ENSG00000167193
hsa-miR-192-5p	CUZD1	ENSG00000138161
hsa-miR-192-5p	ENDOD1	ENSG00000149218
hsa-miR-192-5p	ARF3	ENSG00000134287
hsa-miR-192-5p	C9orf164(hsa)	C9orf164(hsa)
hsa-miR-192-5p	ZNF114	ENSG00000178150
hsa-miR-192-5p	SRD5A1	ENSG00000145545
hsa-miR-192-5p	BC041380(hsa)	BC041380(hsa)
hsa-miR-192-5p	SIRT1	ENSG00000096717
hsa-miR-192-5p	Contig46232(hsa)	Contig46232(hsa)
hsa-miR-192-5p	SLC35G1	ENSG00000176273
hsa-miR-192-5p	VANGL1	ENSG00000173218
hsa-miR-192-5p	GTF3C4	ENSG00000125484
hsa-miR-192-5p	ZMYND11	ENSG00000015171
hsa-miR-192-5p	SUPT4H1	ENSG00000213246
hsa-miR-192-5p	ZNF385B	ENSG00000144331
hsa-miR-192-5p	ZNF267	ENSG00000185947
hsa-miR-192-5p	CYC1	ENSG00000179091
hsa-miR-192-5p	NPHP3-ACAD11	ENSG00000274810
hsa-miR-192-5p	NA	ENSG00000154251
hsa-miR-192-5p	ROPN1L	ENSG00000145491
hsa-miR-192-5p	AK057167(hsa)	AK057167(hsa)
hsa-miR-192-5p	PRIMPOL	ENSG00000164306
hsa-miR-192-5p	ZNF816	ENSG00000180257
hsa-miR-192-5p	MEX3B	ENSG00000183496
hsa-miR-192-5p	44814	ENSG00000186522
hsa-miR-192-5p	DHCR24	ENSG00000116133
hsa-miR-192-5p	ARMCX4	ENSG00000196440
hsa-miR-192-5p	PRRG4	ENSG00000135378
hsa-miR-192-5p	X97444(hsa)	X97444(hsa)
hsa-miR-192-5p	KIF20A	ENSG00000112984
hsa-miR-192-5p	RECQL	ENSG00000004700
hsa-miR-192-5p	ATAD2	ENSG00000156802
hsa-miR-192-5p	TRPC1	ENSG00000144935
hsa-miR-192-5p	ANKRD6	ENSG00000135299
hsa-miR-192-5p	NM_053048(hsa)	NM_053048(hsa)
hsa-miR-192-5p	AK024556(hsa)	AK024556(hsa)
hsa-miR-192-5p	MEIS2	ENSG00000134138
hsa-miR-192-5p	NM_018071(hsa)	NM_018071(hsa)
hsa-miR-192-5p	Contig44186_RC(hsa)	Contig44186_RC(hsa)
hsa-miR-192-5p	hCT1831218(hsa)	hCT1831218(hsa)
hsa-miR-192-5p	PITHD1	ENSG00000057757
hsa-miR-192-5p	EXTL2	ENSG00000162694
hsa-miR-192-5p	LMNB2	ENSG00000176619
hsa-miR-192-5p	XK	ENSG00000047597
hsa-miR-192-5p	Contig1111_RC(hsa)	Contig1111_RC(hsa)
hsa-miR-192-5p	NM_018059(hsa)	NM_018059(hsa)
hsa-miR-192-5p	CEP128	ENSG00000100629
hsa-miR-192-5p	HOOK3	ENSG00000168172
hsa-miR-192-5p	CGNL1	ENSG00000128849
hsa-miR-192-5p	GNPDA1	ENSG00000113552
hsa-miR-192-5p	BCL2L13	ENSG00000099968
hsa-miR-192-5p	HSS00303498(hsa)	HSS00303498(hsa)
hsa-miR-192-5p	GAPDH	ENSG00000111640
hsa-miR-192-5p	UBIAD1	ENSG00000120942
hsa-miR-192-5p	HSS00102527(hsa)	HSS00102527(hsa)
hsa-miR-192-5p	MCM6	ENSG00000076003
hsa-miR-192-5p	PLAGL2	ENSG00000126003
hsa-miR-192-5p	CADPS2	ENSG00000081803
hsa-miR-192-5p	ZNF346	ENSG00000113761
hsa-miR-192-5p	HSS00138557(hsa)	HSS00138557(hsa)
hsa-miR-192-5p	USP1	ENSG00000162607
hsa-miR-192-5p	hCT10607.2(hsa)	hCT10607.2(hsa)
hsa-miR-192-5p	KIF15	ENSG00000163808
hsa-miR-192-5p	CDKN3	ENSG00000100526
hsa-miR-192-5p	RNF103	ENSG00000239305
hsa-miR-192-5p	CKLF	ENSG00000217555
hsa-miR-192-5p	E2F8	ENSG00000129173
hsa-miR-192-5p	PURA	ENSG00000185129
hsa-miR-192-5p	HSPBAP1	ENSG00000169087
hsa-miR-192-5p	XRCC6	ENSG00000196419
hsa-miR-192-5p	PAFAH1B1	ENSG00000007168
hsa-miR-192-5p	ACSF3	ENSG00000176715
hsa-miR-192-5p	ATAD1	ENSG00000138138
hsa-miR-192-5p	STXBP4	ENSG00000166263
hsa-miR-192-5p	RAB40B	ENSG00000141542
hsa-miR-192-5p	AK057710(hsa)	AK057710(hsa)
hsa-miR-192-5p	SOWAHC	ENSG00000198142
hsa-miR-192-5p	HTT	ENSG00000197386
hsa-miR-192-5p	DCXR	ENSG00000169738
hsa-miR-192-5p	ARL2BP	ENSG00000102931
hsa-miR-192-5p	ZNF200	ENSG00000010539
hsa-miR-192-5p	ARHGEF12	ENSG00000196914
hsa-miR-192-5p	SAMD13	ENSG00000203943
hsa-miR-192-5p	FAM189A2	ENSG00000135063
hsa-miR-192-5p	Contig37371_RC(hsa)	Contig37371_RC(hsa)
hsa-miR-192-5p	NEDD4L	ENSG00000049759
hsa-miR-192-5p	PPP1CC	ENSG00000186298
hsa-miR-192-5p	CD83	ENSG00000112149
hsa-miR-192-5p	Contig33888_RC(hsa)	Contig33888_RC(hsa)
hsa-miR-192-5p	CAPNS1	ENSG00000126247
hsa-miR-192-5p	Contig55242_RC(hsa)	Contig55242_RC(hsa)
hsa-miR-192-5p	SMARCA2	ENSG00000080503
hsa-miR-192-5p	MKL2	ENSG00000186260
hsa-miR-192-5p	SATB2	ENSG00000119042
hsa-miR-192-5p	EEA1	ENSG00000102189
hsa-miR-192-5p	TM9SF3	ENSG00000077147
hsa-miR-192-5p	HSS00062828(hsa)	HSS00062828(hsa)
hsa-miR-192-5p	NM_017842(hsa)	NM_017842(hsa)
hsa-miR-192-5p	DBT	ENSG00000137992
hsa-miR-192-5p	ORC1	ENSG00000085840
hsa-miR-192-5p	IFNLR1	ENSG00000185436
hsa-miR-192-5p	HNRNPF	ENSG00000169813
hsa-miR-192-5p	PERP	ENSG00000112378
hsa-miR-192-5p	AK023367(hsa)	AK023367(hsa)
hsa-miR-192-5p	XM_170418(hsa)	XM_170418(hsa)
hsa-miR-192-5p	NPTXR	ENSG00000221890
hsa-miR-192-5p	hCT1642490.1(hsa)	hCT1642490.1(hsa)
hsa-miR-192-5p	CEP78	ENSG00000148019
hsa-miR-192-5p	PDLIM3	ENSG00000154553
hsa-miR-192-5p	BRIP1	ENSG00000136492
hsa-miR-192-5p	ZNF45	ENSG00000124459
hsa-miR-192-5p	NOD2	ENSG00000167207
hsa-miR-192-5p	LRRC8D	ENSG00000171492
hsa-miR-192-5p	HUWE1	ENSG00000086758
hsa-miR-192-5p	KIAA0907	ENSG00000132680
hsa-miR-192-5p	RAD54B	ENSG00000197275
hsa-miR-192-5p	LRRCC1	ENSG00000133739
hsa-miR-192-5p	CHSY3	ENSG00000198108
hsa-miR-192-5p	ERCC3	ENSG00000163161
hsa-miR-192-5p	SAP30	ENSG00000164105
hsa-miR-192-5p	C19orf25	ENSG00000119559
hsa-miR-192-5p	NMU	ENSG00000109255
hsa-miR-192-5p	Contig51328_RC(hsa)	Contig51328_RC(hsa)
hsa-miR-192-5p	GPR180	ENSG00000152749
hsa-miR-192-5p	XM_172878(hsa)	XM_172878(hsa)
hsa-miR-192-5p	SOAT1	ENSG00000057252
hsa-miR-192-5p	INPP5F	ENSG00000198825
hsa-miR-192-5p	FAM101B	ENSG00000183688
hsa-miR-192-5p	IQGAP1	ENSG00000140575
hsa-miR-192-5p	WNK1	ENSG00000060237
hsa-miR-192-5p	RUFY3	ENSG00000018189
hsa-miR-192-5p	PLEKHF2	ENSG00000175895
hsa-miR-192-5p	GSE1	ENSG00000131149
hsa-miR-192-5p	HOXB5	ENSG00000120075
hsa-miR-192-5p	DNAJB5	ENSG00000137094
hsa-miR-192-5p	C16orf46	ENSG00000166455
hsa-miR-192-5p	B4GALT6	ENSG00000118276
hsa-miR-192-5p	IRX4	ENSG00000113430
hsa-miR-192-5p	IL7	ENSG00000104432
hsa-miR-192-5p	ZFYVE26	ENSG00000072121
hsa-miR-192-5p	SPATA13	ENSG00000182957
hsa-miR-192-5p	IRGQ	ENSG00000167378
hsa-miR-192-5p	GPSM1	ENSG00000160360
hsa-miR-192-5p	CDCA4	ENSG00000170779
hsa-miR-192-5p	SNX10	ENSG00000086300
hsa-miR-192-5p	FRK	ENSG00000111816
hsa-miR-192-5p	Contig52708_RC(hsa)	Contig52708_RC(hsa)
hsa-miR-192-5p	C5orf34	ENSG00000172244
hsa-miR-192-5p	HSS00303609(hsa)	HSS00303609(hsa)
hsa-miR-192-5p	CCT4	ENSG00000115484
hsa-miR-192-5p	NHLRC3	ENSG00000188811
hsa-miR-192-5p	NBN	ENSG00000104320
hsa-miR-192-5p	LIMCH1	ENSG00000064042
hsa-miR-192-5p	SUMO1	ENSG00000116030
hsa-miR-192-5p	HSS00087671(hsa)	HSS00087671(hsa)
hsa-miR-192-5p	CIT	ENSG00000122966
hsa-miR-192-5p	FBXO4	ENSG00000151876
hsa-miR-192-5p	KIFAP3	ENSG00000075945
hsa-miR-192-5p	ENST00000270999(hsa)	ENST00000270999(hsa)
hsa-miR-192-5p	SLC25A51	ENSG00000122696
hsa-miR-192-5p	PTBP1	ENSG00000011304
hsa-miR-192-5p	GFOD1	ENSG00000145990
hsa-miR-192-5p	LIN9	ENSG00000183814
hsa-miR-192-5p	BCL2	ENSG00000171791
hsa-miR-192-5p	CPSF6	ENSG00000111605
hsa-miR-192-5p	MPZL1	ENSG00000197965
hsa-miR-192-5p	UBA52	ENSG00000221983
hsa-miR-192-5p	IDH3B	ENSG00000101365
hsa-miR-192-5p	NAP1L4	ENSG00000205531
hsa-miR-192-5p	ZNF320	ENSG00000182986
hsa-miR-192-5p	NM_052864(hsa)	NM_052864(hsa)
hsa-miR-192-5p	Contig58637_RC(hsa)	Contig58637_RC(hsa)
hsa-miR-192-5p	MED13	ENSG00000108510
hsa-miR-192-5p	TUBB	ENSG00000196230
hsa-miR-192-5p	PPP2R4	ENSG00000119383
hsa-miR-192-5p	MACF1	ENSG00000127603
hsa-miR-192-5p	hCT1640801.2(hsa)	hCT1640801.2(hsa)
hsa-miR-192-5p	XPOT	ENSG00000184575
hsa-miR-192-5p	TMTC3	ENSG00000139324
hsa-miR-192-5p	EME1	ENSG00000154920
hsa-miR-192-5p	MAP1LC3B	ENSG00000140941
hsa-miR-192-5p	Contig39983_RC(hsa)	Contig39983_RC(hsa)
hsa-miR-192-5p	PTPN1	ENSG00000196396
hsa-miR-192-5p	HIPK3	ENSG00000110422
hsa-miR-192-5p	DCBLD2	ENSG00000057019
hsa-miR-192-5p	DLG5	ENSG00000151208
hsa-miR-192-5p	UBL3	ENSG00000122042
hsa-miR-192-5p	CCDC14	ENSG00000175455
hsa-miR-192-5p	NM_015393(hsa)	NM_015393(hsa)
hsa-miR-192-5p	AGO2	ENSG00000123908
hsa-miR-192-5p	RAB2A	ENSG00000104388
hsa-miR-192-5p	C1orf86	ENSG00000162585
hsa-miR-192-5p	AXIN1	ENSG00000103126
hsa-miR-192-5p	TMEM180	ENSG00000138111
hsa-miR-192-5p	MCFD2	ENSG00000180398
hsa-miR-192-5p	MIB1	ENSG00000101752
hsa-miR-192-5p	GTPBP1	ENSG00000100226
hsa-miR-192-5p	SLC7A11	ENSG00000151012
hsa-miR-192-5p	LMNB1	ENSG00000113368
hsa-miR-192-5p	hCT1971266.1(hsa)	hCT1971266.1(hsa)
hsa-miR-192-5p	SP3	ENSG00000172845
hsa-miR-192-5p	WNT3	ENSG00000108379
hsa-miR-192-5p	ZNF384	ENSG00000126746
hsa-miR-192-5p	MIPOL1	ENSG00000151338
hsa-miR-192-5p	BRCA2	ENSG00000139618
hsa-miR-192-5p	Contig41377_RC(hsa)	Contig41377_RC(hsa)
hsa-miR-192-5p	Contig40026_RC(hsa)	Contig40026_RC(hsa)
hsa-miR-192-5p	KCNH1	ENSG00000143473
hsa-miR-192-5p	POLD1	ENSG00000062822
hsa-miR-192-5p	KIF18A	ENSG00000121621
hsa-miR-192-5p	TJP2	ENSG00000119139
hsa-miR-192-5p	AF085923(hsa)	AF085923(hsa)
hsa-miR-192-5p	RAB21	ENSG00000080371
hsa-miR-192-5p	CDK1	ENSG00000170312
hsa-miR-192-5p	FAM71E1	ENSG00000142530
hsa-miR-192-5p	UVRAG	ENSG00000198382
hsa-miR-192-5p	AGFG1	ENSG00000173744
hsa-miR-192-5p	NFYA	ENSG00000001167
hsa-miR-192-5p	TNFSF13B	ENSG00000102524
hsa-miR-192-5p	IGF1R	ENSG00000140443
hsa-miR-192-5p	TPGS2	ENSG00000134779
hsa-miR-192-5p	CD164	ENSG00000135535
hsa-miR-192-5p	TIFA	ENSG00000145365
hsa-miR-192-5p	Contig51846_RC(hsa)	Contig51846_RC(hsa)
hsa-miR-192-5p	PABPC4	ENSG00000090621
hsa-miR-192-5p	EEF1A2	ENSG00000101210
hsa-miR-192-5p	XM_210054(hsa)	XM_210054(hsa)
hsa-miR-192-5p	AB002443(hsa)	AB002443(hsa)
hsa-miR-192-5p	LTBP3	ENSG00000168056
hsa-miR-192-5p	GEN1	ENSG00000178295
hsa-miR-192-5p	RAB23	ENSG00000112210
hsa-miR-192-5p	TARDBP	ENSG00000120948
hsa-miR-192-5p	ZNF226	ENSG00000167380
hsa-miR-192-5p	Contig25707_RC(hsa)	Contig25707_RC(hsa)
hsa-miR-192-5p	CLTC	ENSG00000141367
hsa-miR-192-5p	SPCS3	ENSG00000129128
hsa-miR-192-5p	NOTCH2	ENSG00000134250
hsa-miR-192-5p	ZNF519	ENSG00000175322
hsa-miR-192-5p	SERAC1	ENSG00000122335
hsa-miR-192-5p	CHPT1	ENSG00000111666
hsa-miR-192-5p	SLC9A5	ENSG00000135740
hsa-miR-192-5p	HSS00386249(hsa)	HSS00386249(hsa)
hsa-miR-192-5p	hCT1788782.2(hsa)	hCT1788782.2(hsa)
hsa-miR-192-5p	ARHGEF10	ENSG00000104728
hsa-miR-192-5p	AL133577(hsa)	AL133577(hsa)
hsa-miR-192-5p	ERCC6	ENSG00000225830
hsa-miR-192-5p	NOXO1	ENSG00000196408
hsa-miR-192-5p	NOP56	ENSG00000101361
hsa-miR-192-5p	PPP2R2D	ENSG00000175470
[truncated: 6,968 more rows]

## Sheet: Sheet2
Table S5 Potential target genes of differentially expressed miRNAs predicted by picTar
miRNAs	Gene Name	Gene Ensembl id
hsa-miR-26a-5p	MREG	ENSG00000118242
hsa-miR-26a-5p	NOVA1	ENSG00000139910
hsa-miR-26a-5p	BCL6	ENSG00000113916
hsa-miR-26a-5p	SLC30A10	ENSG00000196660
hsa-miR-26a-5p	BOD1	ENSG00000145919
hsa-miR-26a-5p	ZFHX4	ENSG00000091656
hsa-miR-26a-5p	FAM136A	ENSG00000035141
hsa-miR-26a-5p	PLOD2	ENSG00000152952
hsa-miR-26a-5p	C20orf24	ENSG00000101084
hsa-miR-26a-5p	HNRNPUL1	ENSG00000105323
hsa-miR-26a-5p	MPRIP	ENSG00000133030
hsa-miR-26a-5p	LEF1	ENSG00000138795
hsa-miR-26a-5p	DYRK1A	ENSG00000157540
hsa-miR-26a-5p	DYRK1A	ENSG00000157540
hsa-miR-26a-5p	DYRK1A	ENSG00000157540
hsa-miR-26a-5p	LRRTM4	ENSG00000176204
hsa-miR-26a-5p	RANBP9	ENSG00000010017
hsa-miR-26a-5p	PPP1R15B	ENSG00000158615
hsa-miR-26a-5p	GTF3C2	ENSG00000115207
hsa-miR-26a-5p	BICD2	ENSG00000185963
hsa-miR-26a-5p	SMAD4	ENSG00000141646
hsa-miR-26a-5p	CEBPG	ENSG00000153879
hsa-miR-26a-5p	TMEM33	ENSG00000109133
hsa-miR-26a-5p	SLC25A20	ENSG00000178537
hsa-miR-26a-5p	KBTBD8	ENSG00000163376
hsa-miR-26a-5p	PITPNC1	ENSG00000154217
hsa-miR-26a-5p	ESRRG	ENSG00000196482
hsa-miR-26a-5p	ESRRG	ENSG00000196482
hsa-miR-26a-5p	PHF20L1	ENSG00000129292
hsa-miR-26a-5p	CARMIL1	ENSG00000079691
hsa-miR-26a-5p	KMT5C	ENSG00000133247
hsa-miR-26a-5p	PGRMC2	ENSG00000164040
hsa-miR-26a-5p	PRR5L	ENSG00000135362
hsa-miR-26a-5p	ZCCHC24	ENSG00000165424
hsa-miR-26a-5p	KPNA3	ENSG00000102753
hsa-miR-26a-5p	GALNT10	ENSG00000164574
hsa-miR-26a-5p	PDGFRA	ENSG00000134853
hsa-miR-26a-5p	HAO1	ENSG00000101323
hsa-miR-26a-5p	BCL6	ENSG00000113916
hsa-miR-26a-5p	MEX3C	ENSG00000176624
hsa-miR-26a-5p	FAM49B	ENSG00000153310
hsa-miR-26a-5p	PHF21A	ENSG00000135365
hsa-miR-26a-5p	A	ENSG00000152520
hsa-miR-26a-5p	ARHGEF26	ENSG00000114790
hsa-miR-26a-5p	COPS2	ENSG00000166200
hsa-miR-26a-5p	KLF4	ENSG00000136826
hsa-miR-26a-5p	MAB21L1	ENSG00000180660
hsa-miR-26a-5p	ARHGAP21	ENSG00000107863
hsa-miR-26a-5p	CCND2	ENSG00000118971
hsa-miR-26a-5p	RPGR	ENSG00000156313
hsa-miR-26a-5p	DYRK1A	ENSG00000157540
hsa-miR-26a-5p	ABHD2	ENSG00000140526
hsa-miR-26a-5p	GRK2	ENSG00000173020
hsa-miR-26a-5p	KCNK1	ENSG00000135750
hsa-miR-26a-5p	PCDH9	ENSG00000184226
hsa-miR-26a-5p	CCDC141	ENSG00000163492
hsa-miR-26a-5p	SOCS5	ENSG00000171150
hsa-miR-26a-5p	CLDND1	ENSG00000080822
hsa-miR-26a-5p	ESR1	ENSG00000091831
hsa-miR-26a-5p	SGCD	ENSG00000170624
hsa-miR-26a-5p	ADM	ENSG00000148926
hsa-miR-26a-5p	AKAP7	ENSG00000118507
hsa-miR-26a-5p	FANCA	ENSG00000187741
hsa-miR-26a-5p	NLK	ENSG00000087095
hsa-miR-26a-5p	AMPH	ENSG00000078053
hsa-miR-26a-5p	HECTD3	ENSG00000126107
hsa-miR-26a-5p	MAP1A	ENSG00000166963
hsa-miR-26a-5p	MAP2	ENSG00000078018
hsa-miR-26a-5p	TMPRSS11F	ENSG00000198092
hsa-miR-26a-5p	YPEL1	ENSG00000100027
hsa-miR-26a-5p	EDEM3	ENSG00000116406
hsa-miR-26a-5p	MTDH	ENSG00000147649
hsa-miR-26a-5p	BTG1	ENSG00000133639
hsa-miR-26a-5p	TET1	ENSG00000138336
hsa-miR-26a-5p	PTPN13	ENSG00000163629
hsa-miR-26a-5p	ERLIN1	ENSG00000107566
hsa-miR-26a-5p	CPEB4	ENSG00000113742
hsa-miR-26a-5p	CLIC5	ENSG00000112782
hsa-miR-26a-5p	ITPR1	ENSG00000150995
hsa-miR-26a-5p	PDCD10	ENSG00000114209
hsa-miR-26a-5p	ARL4C	ENSG00000188042
hsa-miR-26a-5p	HDAC9	ENSG00000048052
hsa-miR-26a-5p	ZBTB18	ENSG00000179456
hsa-miR-26a-5p	CCNE1	ENSG00000105173
hsa-miR-26a-5p	ANKRD17	ENSG00000132466
hsa-miR-26a-5p	EAF1	ENSG00000144597
hsa-miR-26a-5p	MTX2	ENSG00000128654
hsa-miR-26a-5p	SSH2	ENSG00000141298
hsa-miR-26a-5p	FAM214B	ENSG00000005238
hsa-miR-26a-5p	HIPK1	ENSG00000163349
hsa-miR-26a-5p	ITGA6	ENSG00000091409
hsa-miR-26a-5p	JAG1	ENSG00000101384
hsa-miR-26a-5p	DCDC2	ENSG00000146038
hsa-miR-26a-5p	PRKCD	ENSG00000163932
hsa-miR-26a-5p	ACTA1	ENSG00000143632
hsa-miR-26a-5p	NAMPT	ENSG00000105835
hsa-miR-26a-5p	PHTF2	ENSG00000006576
hsa-miR-26a-5p	ARMCX2	ENSG00000184867
hsa-miR-26a-5p	TOB1	ENSG00000141232
hsa-miR-26a-5p	ZBTB18	ENSG00000179456
hsa-miR-26a-5p	RNF111	ENSG00000157450
hsa-miR-26a-5p	NAGPA	ENSG00000103174
hsa-miR-26a-5p	CDK6	ENSG00000105810
hsa-miR-26a-5p	ADAM19	ENSG00000135074
hsa-miR-26a-5p	ZFC3H1	ENSG00000133858
hsa-miR-26a-5p	KCNH7	ENSG00000184611
hsa-miR-26a-5p	G3BP2	ENSG00000138757
hsa-miR-26a-5p	G3BP2	ENSG00000138757
hsa-miR-26a-5p	PSD3	ENSG00000156011
hsa-miR-26a-5p	NUS1	ENSG00000153989
hsa-miR-26a-5p	ACTR3B	ENSG00000133627
hsa-miR-26a-5p	CCNE2	ENSG00000175305
hsa-miR-26a-5p	CD200	ENSG00000091972
hsa-miR-26a-5p	TMEM168	ENSG00000146802
hsa-miR-26a-5p	RCN2	ENSG00000117906
hsa-miR-26a-5p	SYT10	ENSG00000110975
hsa-miR-26a-5p	STAC2	ENSG00000141750
hsa-miR-26a-5p	BLOC1S2	ENSG00000196072
hsa-miR-26a-5p	SLC25A16	ENSG00000122912
hsa-miR-26a-5p	ITGA5	ENSG00000161638
hsa-miR-26a-5p	GRHL3	ENSG00000158055
hsa-miR-26a-5p	GRHL3	ENSG00000158055
hsa-miR-26a-5p	ZDHHC6	ENSG00000023041
hsa-miR-26a-5p	CTTNBP2NL	ENSG00000143079
hsa-miR-26a-5p	USP37	ENSG00000135913
hsa-miR-26a-5p	EPC2	ENSG00000135999
hsa-miR-26a-5p	MLEC	ENSG00000110917
hsa-miR-26a-5p	CCSER2	ENSG00000107771
hsa-miR-26a-5p	ZDHHC18	ENSG00000204160
hsa-miR-26a-5p	DCAF7	ENSG00000136485
hsa-miR-26a-5p	CCNE2	ENSG00000175305
hsa-miR-26a-5p	FBXL19	ENSG00000099364
hsa-miR-26a-5p	CCNJ	ENSG00000107443
hsa-miR-26a-5p	TMEM2	ENSG00000135048
hsa-miR-26a-5p	UBE2L3	ENSG00000185651
hsa-miR-26a-5p	COL19A1	ENSG00000082293
hsa-miR-26a-5p	NOVA1	ENSG00000139910
hsa-miR-26a-5p	ARHGEF12	ENSG00000196914
hsa-miR-26a-5p	MOB3C	ENSG00000142961
hsa-miR-26a-5p	WNK3	ENSG00000196632
hsa-miR-26a-5p	SERBP1	ENSG00000142864
hsa-miR-26a-5p	ING3	ENSG00000071243
hsa-miR-26a-5p	ALDH5A1	ENSG00000112294
hsa-miR-26a-5p	CDR2L	ENSG00000109089
hsa-miR-26a-5p	ABHD2	ENSG00000140526
hsa-miR-26a-5p	BICD2	ENSG00000185963
hsa-miR-26a-5p	CAMSAP1	ENSG00000130559
hsa-miR-26a-5p	EHD1	ENSG00000110047
hsa-miR-26a-5p	PRELP	ENSG00000188783
hsa-miR-26a-5p	PTPN3	ENSG00000070159
hsa-miR-26a-5p	SLC38A2	ENSG00000134294
hsa-miR-26a-5p	C10orf12	ENSG00000196233
hsa-miR-26a-5p	VAMP4	ENSG00000117533
hsa-miR-26a-5p	ANK2	ENSG00000145362
hsa-miR-26a-5p	ABCC4	ENSG00000125257
hsa-miR-26a-5p	RCBTB1	ENSG00000136144
hsa-miR-26a-5p	MAP1B	ENSG00000131711
hsa-miR-26a-5p	ANKS1A	ENSG00000064999
hsa-miR-26a-5p	CCDC28A	ENSG00000024862
hsa-miR-26a-5p	CLK3	ENSG00000179335
hsa-miR-26a-5p	ACVR1C	ENSG00000123612
hsa-miR-26a-5p	SMAD1	ENSG00000170365
hsa-miR-26a-5p	FSD1L	ENSG00000106701
hsa-miR-26a-5p	TMEM88	ENSG00000167874
hsa-miR-26a-5p	FAM84A	ENSG00000162981
hsa-miR-26a-5p	FAM98A	ENSG00000119812
hsa-miR-26a-5p	SPOCK2	ENSG00000107742
hsa-miR-26a-5p	DNA	ENSG00000198900
hsa-miR-26a-5p	VAMP1	ENSG00000139190
hsa-miR-26a-5p	RBM24	ENSG00000112183
hsa-miR-26a-5p	TMEM263	ENSG00000151135
hsa-miR-26a-5p	DCBLD2	ENSG00000057019
hsa-miR-26a-5p	EIF5	ENSG00000100664
hsa-miR-26a-5p	WNK3	ENSG00000196632
hsa-miR-26a-5p	SOSTDC1	ENSG00000171243
hsa-miR-26a-5p	OAF	ENSG00000184232
hsa-miR-26a-5p	APCDD1	ENSG00000154856
hsa-miR-26a-5p	DMRT3	ENSG00000064218
hsa-miR-26a-5p	BRWD1	ENSG00000185658
hsa-miR-26a-5p	MAP2	ENSG00000078018
hsa-miR-26a-5p	MAP2	ENSG00000078018
hsa-miR-26a-5p	HNRNPUL1	ENSG00000105323
hsa-miR-26a-5p	MAP2	ENSG00000078018
hsa-miR-26a-5p	ARMCX2	ENSG00000184867
hsa-miR-26a-5p	HNRNPUL1	ENSG00000105323
hsa-miR-26a-5p	NAB1	ENSG00000138386
hsa-miR-26a-5p	HNRNPUL1	ENSG00000105323
hsa-miR-26a-5p	ULK2	ENSG00000083290
hsa-miR-26a-5p	TRIB2	ENSG00000071575
hsa-miR-26a-5p	ARPP21	ENSG00000172995
hsa-miR-26a-5p	WAPL	ENSG00000062650
hsa-miR-26a-5p	COL1A2	ENSG00000164692
hsa-miR-26a-5p	NTN4	ENSG00000074527
hsa-miR-26a-5p	ACBD5	ENSG00000107897
hsa-miR-26a-5p	SALL1	ENSG00000103449
hsa-miR-26a-5p	ALS2	ENSG00000003393
hsa-miR-26a-5p	WDFY3	ENSG00000163625
hsa-miR-26a-5p	ERBB4	ENSG00000178568
hsa-miR-26a-5p	ZNF462	ENSG00000148143
hsa-miR-26a-5p	PATZ1	ENSG00000100105
hsa-miR-26a-5p	KALRN	ENSG00000160145
hsa-miR-26a-5p	JAKMIP2	ENSG00000176049
hsa-miR-26a-5p	TMEM189	ENSG00000240849
hsa-miR-26a-5p	CARM1	ENSG00000142453
hsa-miR-26a-5p	NUP153	ENSG00000124789
hsa-miR-26a-5p	MATR3	ENSG00000280987
hsa-miR-26a-5p	MATR3	ENSG00000015479
hsa-miR-26a-5p	ARID3A	ENSG00000116017
hsa-miR-26a-5p	PITPNC1	ENSG00000154217
hsa-miR-26a-5p	CREBZF	ENSG00000137504
hsa-miR-26a-5p	ZEB2	ENSG00000169554
hsa-miR-26a-5p	ANKS1B	ENSG00000185046
hsa-miR-26a-5p	ZNF655	ENSG00000197343
hsa-miR-26a-5p	ASXL1	ENSG00000171456
hsa-miR-26a-5p	SLC12A2	ENSG00000064651
hsa-miR-26a-5p	BBX	ENSG00000114439
hsa-miR-26a-5p	CD200	ENSG00000091972
hsa-miR-26a-5p	RAC1	ENSG00000180370
hsa-miR-26a-5p	BTBD7	ENSG00000011114
hsa-miR-26a-5p	MED13L	ENSG00000123066
hsa-miR-26a-5p	EDRF1	ENSG00000107938
hsa-miR-26a-5p	NETO1	ENSG00000166342
hsa-miR-26a-5p	C20orf24	ENSG00000101084
hsa-miR-26a-5p	ADAMTS6	ENSG00000049192
hsa-miR-26a-5p	KMT5A	ENSG00000183955
hsa-miR-26a-5p	GRSF1	ENSG00000132463
hsa-miR-26a-5p	LSM11	ENSG00000155858
hsa-miR-26a-5p	HGF	ENSG00000019991
hsa-miR-26a-5p	INHBB	ENSG00000163083
hsa-miR-26a-5p	ACSL3	ENSG00000123983
hsa-miR-26a-5p	PHF6	ENSG00000156531
hsa-miR-26a-5p	FAM46C	ENSG00000183508
hsa-miR-26a-5p	GSK3B	ENSG00000082701
hsa-miR-26a-5p	PGM2L1	ENSG00000165434
hsa-miR-26a-5p	RTN1	ENSG00000139970
hsa-miR-26a-5p	UBE2L3	ENSG00000185651
hsa-miR-26a-5p	alpha	ENSG00000164134
hsa-miR-26a-5p	SOCS5	ENSG00000171150
hsa-miR-26a-5p	ENC1	ENSG00000171617
hsa-miR-26a-5p	KCTD18	ENSG00000155729
hsa-miR-26a-5p	PELI2	ENSG00000139946
hsa-miR-26a-5p	SRP19	ENSG00000153037
hsa-miR-26a-5p	TAB3	ENSG00000157625
hsa-miR-26a-5p	SRPK1	ENSG00000096063
hsa-miR-26a-5p	PDCD10	ENSG00000114209
hsa-miR-26a-5p	Hsp40	ENSG00000168724
hsa-miR-26a-5p	UBE2G1	ENSG00000132388
hsa-miR-26a-5p	RTN1	ENSG00000139970
hsa-miR-26a-5p	CAMK2A	ENSG00000070808
hsa-miR-26a-5p	OTUD4	ENSG00000164164
hsa-miR-26a-5p	putative	ENSG00000144357
hsa-miR-26a-5p	CAMSAP2	ENSG00000118200
hsa-miR-26a-5p	SMAP2	ENSG00000084070
hsa-miR-26a-5p	COPS7B	ENSG00000144524
hsa-miR-26a-5p	EIF3A	ENSG00000107581
hsa-miR-26a-5p	NABP1	ENSG00000173559
hsa-miR-26a-5p	SASS6	ENSG00000156876
hsa-miR-26a-5p	TMCC1	ENSG00000172765
hsa-miR-26a-5p	UBE2D1	ENSG00000072401
hsa-miR-26a-5p	MARK1	ENSG00000116141
hsa-miR-26a-5p	KCNJ2	ENSG00000123700
hsa-miR-26a-5p	MEX3B	ENSG00000183496
hsa-miR-26a-5p	SSX2IP	ENSG00000117155
hsa-miR-26a-5p	NAP1L5	ENSG00000177432
hsa-miR-26a-5p	CDK13	ENSG00000065883
hsa-miR-26a-5p	DRAM1	ENSG00000136048
hsa-miR-26a-5p	CPEB2	ENSG00000137449
hsa-miR-26a-5p	KDM6A	ENSG00000147050
hsa-miR-26a-5p	ADAM12	ENSG00000148848
hsa-miR-26a-5p	SOX17	ENSG00000164736
hsa-miR-26a-5p	PDCD10	ENSG00000114209
hsa-miR-26a-5p	RTN1	ENSG00000139970
hsa-miR-26a-5p	PPP3CB	ENSG00000107758
hsa-miR-26a-5p	HOXA5	ENSG00000106004
hsa-miR-26a-5p	PTGS2	ENSG00000073756
hsa-miR-26a-5p	USP48	ENSG00000090686
hsa-miR-26a-5p	SENP5	ENSG00000119231
hsa-miR-26a-5p	BHLHE40	ENSG00000134107
hsa-miR-26a-5p	STRBP	ENSG00000165209
hsa-miR-26a-5p	PLCB1	ENSG00000182621
hsa-miR-26a-5p	KCNQ4	ENSG00000117013
hsa-miR-26a-5p	PCDH9	ENSG00000184226
hsa-miR-26a-5p	CDK13	ENSG00000065883
hsa-miR-26a-5p	SLC24A4	ENSG00000140090
hsa-miR-26a-5p	AKAP7	ENSG00000118507
hsa-miR-26a-5p	SLC24A4	ENSG00000140090
hsa-miR-26a-5p	PTP4A1	ENSG00000112245
hsa-miR-26a-5p	CCNE2	ENSG00000175305
hsa-miR-26a-5p	SLC24A4	ENSG00000140090
hsa-miR-26a-5p	PRELP	ENSG00000188783
hsa-miR-26a-5p	RAP1A	ENSG00000116473
hsa-miR-26a-5p	CCNE1	ENSG00000105173
hsa-miR-26a-5p	RLF	ENSG00000117000
hsa-miR-26a-5p	CHD6	ENSG00000124177
hsa-miR-26a-5p	G3BP2	ENSG00000138757
hsa-miR-26a-5p	DYRK1A	ENSG00000157540
hsa-miR-26a-5p	CHSY1	ENSG00000131873
hsa-miR-26a-5p	ETF1	ENSG00000120705
hsa-miR-26a-5p	putative	ENSG00000104343
hsa-miR-26a-5p	WHSC1	ENSG00000109685
hsa-miR-26a-5p	FA2H	ENSG00000103089
hsa-miR-26a-5p	MCL1	ENSG00000143384
hsa-miR-26a-5p	CHAC1	ENSG00000128965
hsa-miR-26a-5p	WNT5A	ENSG00000114251
hsa-miR-26a-5p	MTPN	ENSG00000105887
hsa-miR-26a-5p	CDK14	ENSG00000058091
hsa-miR-26a-5p	CPEB3	ENSG00000107864
hsa-miR-26a-5p	SLC6A15	ENSG00000072041
hsa-miR-26a-5p	LGR4	ENSG00000205213
hsa-miR-26a-5p	MCL1	ENSG00000143384
hsa-miR-26a-5p	LSM12	ENSG00000161654
hsa-miR-26a-5p	HECTD2	ENSG00000165338
hsa-miR-26a-5p	CEP350	ENSG00000135837
hsa-miR-26a-5p	ANKRD17	ENSG00000132466
hsa-miR-26a-5p	TRPS1	ENSG00000104447
hsa-miR-26a-5p	HMGA2	ENSG00000149948
hsa-miR-26a-5p	FBXO28	ENSG00000143756
hsa-miR-26a-5p	NOL4	ENSG00000101746
hsa-miR-26a-5p	ANK2	ENSG00000145362
hsa-miR-26a-5p	ADCY6	ENSG00000174233
hsa-miR-26a-5p	COL22A1	ENSG00000169436
hsa-miR-26a-5p	GGA3	ENSG00000125447
hsa-miR-26a-5p	VLDLR	ENSG00000147852
hsa-miR-26a-5p	SMAD1	ENSG00000170365
hsa-miR-26a-5p	CDH2	ENSG00000170558
hsa-miR-26a-5p	C2CD2L	ENSG00000172375
hsa-miR-26a-5p	PHLDB2	ENSG00000144824
hsa-miR-26a-5p	C2CD5	ENSG00000111731
hsa-miR-26a-5p	GlcNAc	ENSG00000147162
hsa-miR-26a-5p	PDHX	ENSG00000110435
hsa-miR-26a-5p	ARPP19	ENSG00000128989
hsa-miR-26a-5p	SEMA6D	ENSG00000137872
hsa-miR-26a-5p	RAP2C	ENSG00000123728
hsa-miR-26a-5p	SEMA6D	ENSG00000137872
hsa-miR-26a-5p	HOXD13	ENSG00000128714
hsa-miR-26a-5p	SLC22A23	ENSG00000137266
hsa-miR-26a-5p	SEMA6D	ENSG00000137872
hsa-miR-26a-5p	SEMA6D	ENSG00000137872
hsa-miR-26a-5p	TTC28	ENSG00000100154
hsa-miR-26a-5p	PLAG1	ENSG00000181690
hsa-miR-26a-5p	TAB3	ENSG00000157625
hsa-miR-26a-5p	GRHL3	ENSG00000158055
hsa-miR-26a-5p	CDH4	ENSG00000179242
hsa-miR-26a-5p	ADCY6	ENSG00000174233
hsa-miR-26a-5p	SLC4A4	ENSG00000080493
hsa-miR-26a-5p	YWHAE	ENSG00000108953
hsa-miR-26a-5p	NAD	ENSG00000164120
hsa-miR-26a-5p	CAMK2A	ENSG00000070808
hsa-miR-26a-5p	WDFY3	ENSG00000163625
hsa-miR-26a-5p	REEP3	ENSG00000165476
hsa-miR-26a-5p	RTF1	ENSG00000137815
hsa-miR-26a-5p	MFN1	ENSG00000171109
hsa-miR-26a-5p	CREBRF	ENSG00000164463
hsa-miR-26a-5p	CPEB2	ENSG00000137449
hsa-miR-26a-5p	PHF3	ENSG00000118482
hsa-miR-26a-5p	GALNT10	ENSG00000164574
hsa-miR-26a-5p	PLP1	ENSG00000123560
hsa-miR-26a-5p	DLG5	ENSG00000151208
hsa-miR-26a-5p	STK39	ENSG00000198648
hsa-miR-26a-5p	PIM1	ENSG00000137193
hsa-miR-26a-5p	SSFA2	ENSG00000138434
hsa-miR-26a-5p	NHS	ENSG00000188158
hsa-miR-26a-5p	GGA3	ENSG00000125447
hsa-miR-26a-5p	HIPK1	ENSG00000163349
hsa-miR-26a-5p	HIPK1	ENSG00000163349
hsa-miR-26a-5p	MOB3C	ENSG00000142961
hsa-miR-26a-5p	ING3	ENSG00000071243
hsa-miR-26a-5p	PLCB1	ENSG00000182621
hsa-miR-26a-5p	TAF5	ENSG00000148835
hsa-miR-26a-5p	B4GALT1	ENSG00000086062
hsa-miR-26a-5p	SNN	ENSG00000184602
hsa-miR-26a-5p	PIK3R3	ENSG00000117461
hsa-miR-26a-5p	PIK3R3	ENSG00000278139
hsa-miR-26a-5p	UBE4B	ENSG00000130939
hsa-miR-26a-5p	TLK2	ENSG00000146872
hsa-miR-26a-5p	ZNF410	ENSG00000119725
hsa-miR-26a-5p	FCHSD2	ENSG00000137478
hsa-miR-26a-5p	ATP11C	ENSG00000101974
hsa-miR-26a-5p	A	ENSG00000164329
hsa-miR-26a-5p	PCDH18	ENSG00000189184
hsa-miR-26a-5p	ZNF217	ENSG00000171940
hsa-miR-26a-5p	PHF23	ENSG00000040633
hsa-miR-26a-5p	SACS	ENSG00000151835
hsa-miR-26a-5p	ATP1A2	ENSG00000018625
hsa-miR-26a-5p	SH3RF1	ENSG00000154447
hsa-miR-26a-5p	WHSC1	ENSG00000109685
hsa-miR-26a-5p	WHSC1	ENSG00000109685
hsa-miR-26a-5p	AMPH	ENSG00000078053
hsa-miR-26a-5p	WHSC1	ENSG00000109685
hsa-miR-26a-5p	WHSC1	ENSG00000109685
hsa-miR-26a-5p	WHSC1	ENSG00000109685
hsa-miR-26a-5p	WHSC1	ENSG00000109685
hsa-miR-26a-5p	USP3	ENSG00000140455
hsa-miR-26a-5p	FAM45A	ENSG00000119979
hsa-miR-26a-5p	LRRC1	ENSG00000137269
hsa-miR-26a-5p	BLOC1S2	ENSG00000196072
hsa-miR-26a-5p	CACNA1C	ENSG00000151067
hsa-miR-26a-5p	KCNQ4	ENSG00000117013
hsa-miR-26a-5p	BAG4	ENSG00000156735
hsa-miR-26a-5p	TMEM184B	ENSG00000198792
hsa-miR-26a-5p	TNRC6A	ENSG00000090905
hsa-miR-26a-5p	RPS6KA6	ENSG00000072133
hsa-miR-26a-5p	MUM1L1	ENSG00000157502
hsa-miR-26a-5p	RAB11A	ENSG00000103769
hsa-miR-26a-5p	MECP2	ENSG00000169057
hsa-miR-26a-5p	ACSL3	ENSG00000123983
hsa-miR-26a-5p	CAPZA1	ENSG00000116489
hsa-miR-26a-5p	STRADB	ENSG00000082146
hsa-miR-26a-5p	ZNF385B	ENSG00000144331
hsa-miR-26a-5p	RANBP10	ENSG00000141084
hsa-miR-26a-5p	PNRC1	ENSG00000146278
hsa-miR-26a-5p	KIAA1468	ENSG00000134444
hsa-miR-26a-5p	SEMA6D	ENSG00000137872
hsa-miR-26a-5p	PRKAG2	ENSG00000106617
hsa-miR-26a-5p	AKAP7	ENSG00000118507
hsa-miR-26a-5p	PTER	ENSG00000165983
hsa-miR-26a-5p	CPSF2	ENSG00000165934
hsa-miR-26a-5p	BHLHE22	ENSG00000180828
hsa-miR-26a-5p	MMP14	ENSG00000157227
hsa-miR-26a-5p	ARFGEF1	ENSG00000066777
hsa-miR-26a-5p	ALDH5A1	ENSG00000112294
hsa-miR-26a-5p	CLTC	ENSG00000141367
hsa-miR-26a-5p	CDK2AP1	ENSG00000111328
hsa-miR-26a-5p	TTC13	ENSG00000143643
hsa-miR-26a-5p	PRKCD	ENSG00000163932
hsa-miR-26a-5p	TRPC3	ENSG00000138741
hsa-miR-26a-5p	TAF12	ENSG00000120656
hsa-miR-26a-5p	EPB41L3	ENSG00000082397
hsa-miR-26a-5p	PPP3R1	ENSG00000221823
hsa-miR-26a-5p	ABCA1	ENSG00000165029
hsa-miR-26a-5p	LRRC1	ENSG00000137269
hsa-miR-26a-5p	NETO1	ENSG00000166342
hsa-miR-26a-5p	CHST2	ENSG00000175040
hsa-miR-26a-5p	EPHA7	ENSG00000135333
hsa-miR-26a-5p	EPAS1	ENSG00000116016
hsa-miR-26a-5p	NEK6	ENSG00000119408
hsa-miR-26a-5p	ZCCHC2	ENSG00000141664
hsa-miR-26a-5p	MRAS	ENSG00000158186
hsa-miR-26a-5p	MAP1B	ENSG00000131711
hsa-miR-26a-5p	ESRRG	ENSG00000196482
hsa-miR-26a-5p	AKIRIN1	ENSG00000174574
hsa-miR-26a-5p	putative	ENSG00000104343
hsa-miR-26a-5p	putative	ENSG00000104343
hsa-miR-26a-5p	POM121	ENSG00000196313
hsa-miR-26a-5p	SERP1	ENSG00000120742
hsa-miR-26a-5p	alpha-1,3-	ENSG00000071073
hsa-miR-26a-5p	C20orf24	ENSG00000101084
hsa-miR-26a-5p	C20orf24	ENSG00000101084
hsa-miR-26a-5p	SLC22A15	ENSG00000163393
hsa-miR-26a-5p	CELSR1	ENSG00000075275
hsa-miR-26a-5p	PLP1	ENSG00000123560
hsa-miR-26a-5p	CHFR	ENSG00000072609
hsa-miR-26a-5p	FBXO11	ENSG00000138081
hsa-miR-26a-5p	KIF1B	ENSG00000054523
hsa-miR-26a-5p	DAPK1	ENSG00000196730
hsa-miR-26a-5p	PTER	ENSG00000165983
hsa-miR-26a-5p	MOB1A	ENSG00000114978
hsa-miR-26a-5p	SRGAP1	ENSG00000196935
hsa-miR-26a-5p	PALMD	ENSG00000099260
hsa-miR-26a-5p	BCL9L	ENSG00000186174
hsa-miR-26a-5p	COX5A	ENSG00000178741
hsa-miR-26a-5p	PTPN13	ENSG00000163629
hsa-miR-26a-5p	PTPN13	ENSG00000163629
hsa-miR-26a-5p	REEP4	ENSG00000168476
hsa-miR-26a-5p	PTPN13	ENSG00000163629
hsa-miR-26a-5p	EPHA2	ENSG00000142627
hsa-miR-26a-5p	DEPDC1B	ENSG00000035499
hsa-miR-26a-5p	ATP2C1	ENSG00000017260
hsa-miR-26a-5p	EIF5	ENSG00000100664
hsa-miR-26a-5p	ATPAF1	ENSG00000123472
hsa-miR-26a-5p	YES1	ENSG00000176105
hsa-miR-26a-5p	TNKS2	ENSG00000107854
hsa-miR-26a-5p	ZC3H7B	ENSG00000100403
hsa-miR-26a-5p	XKRX	ENSG00000182489
hsa-miR-26a-5p	MFSD6	ENSG00000151690
hsa-miR-26a-5p	HAS2	ENSG00000170961
hsa-miR-26a-5p	HAS3	ENSG00000103044
hsa-miR-26a-5p	NCEH1	ENSG00000144959
hsa-miR-26a-5p	CREBBP	ENSG00000005339
hsa-miR-26a-5p	UBE2G1	ENSG00000132388
hsa-miR-26a-5p	E2F7	ENSG00000165891
hsa-miR-26a-5p	LRRN3	ENSG00000173114
hsa-miR-26a-5p	NFE2L3	ENSG00000050344
hsa-miR-26a-5p	SHTN1	ENSG00000187164
hsa-miR-26a-5p	CHORDC1	ENSG00000110172
hsa-miR-26a-5p	SLC1A1	ENSG00000106688
hsa-miR-26a-5p	RGS4	ENSG00000117152
hsa-miR-26a-5p	MYCBP	ENSG00000214114
hsa-miR-26a-5p	MYCBP	ENSG00000274944
hsa-miR-26a-5p	C9orf40	ENSG00000135045
hsa-miR-26a-5p	BCL11A	ENSG00000119866
hsa-miR-26a-5p	PLOD2	ENSG00000152952
hsa-miR-26a-5p	ASPN	ENSG00000106819
hsa-miR-26a-5p	ULK1	ENSG00000177169
hsa-miR-26a-5p	UBE2E2	ENSG00000182247
hsa-miR-26a-5p	AKAP6	ENSG00000151320
hsa-miR-26a-5p	LINGO1	ENSG00000169783
hsa-miR-26a-5p	DCAF7	ENSG00000136485
hsa-miR-155-5p	PSKH1	ENSG00000159792
hsa-miR-155-5p	NOVA1	ENSG00000139910
hsa-miR-155-5p	ZNF703	ENSG00000183779
hsa-miR-155-5p	GDF6	ENSG00000156466
hsa-miR-155-5p	TMEM178A	ENSG00000152154
hsa-miR-155-5p	ADD3	ENSG00000148700
hsa-miR-155-5p	SGK3	ENSG00000104205
hsa-miR-155-5p	CAB39	ENSG00000135932
hsa-miR-155-5p	MARCH7	ENSG00000136536
hsa-miR-155-5p	ZFHX4	ENSG00000091656
hsa-miR-155-5p	ZNF236	ENSG00000130856
hsa-miR-155-5p	HIVEP2	ENSG00000010818
hsa-miR-155-5p	N4BP1	ENSG00000102921
hsa-miR-155-5p	ASTN2	ENSG00000148219
hsa-miR-155-5p	C1QL2	ENSG00000144119
hsa-miR-155-5p	TAB2	ENSG00000228408
hsa-miR-155-5p	TAB2	ENSG00000055208
hsa-miR-155-5p	LRRC59	ENSG00000108829
hsa-miR-155-5p	SYPL1	ENSG00000008282
hsa-miR-155-5p	PAPOLA	ENSG00000090060
hsa-miR-155-5p	NFAT5	ENSG00000102908
hsa-miR-155-5p	SOCS1	ENSG00000185338
hsa-miR-155-5p	UBR3	ENSG00000144357
hsa-miR-155-5p	ZNF644	ENSG00000122482
hsa-miR-155-5p	CSF1R	ENSG00000182578
hsa-miR-155-5p	MEIS1	ENSG00000143995
hsa-miR-155-5p	STON1	ENSG00000243244
hsa-miR-155-5p	RAB6A	ENSG00000175582
hsa-miR-155-5p	ZFP69	ENSG00000187815
hsa-miR-155-5p	KAT2A	ENSG00000108773
hsa-miR-155-5p	SOCS6	ENSG00000170677
hsa-miR-155-5p	CNIH1	ENSG00000100528
hsa-miR-155-5p	SCG2	ENSG00000171951
hsa-miR-155-5p	ADD3	ENSG00000148700
hsa-miR-155-5p	COPS3	ENSG00000141030
hsa-miR-155-5p	USP48	ENSG00000090686
hsa-miR-155-5p	KPNA4	ENSG00000186432
hsa-miR-155-5p	SPRED1	ENSG00000166068
hsa-miR-155-5p	PALD1	ENSG00000107719
hsa-miR-155-5p	NFAT5	ENSG00000102908
hsa-miR-155-5p	PCDH9	ENSG00000184226
hsa-miR-155-5p	HIF1A	ENSG00000100644
hsa-miR-155-5p	SIM2	ENSG00000159263
hsa-miR-155-5p	MYO1D	ENSG00000176658
hsa-miR-155-5p	SOX1	ENSG00000182968
hsa-miR-155-5p	MYB	ENSG00000118513
hsa-miR-155-5p	PSIP1	ENSG00000164985
hsa-miR-155-5p	S1PR1	ENSG00000170989
hsa-miR-155-5p	FAR1	ENSG00000197601
hsa-miR-155-5p	CTDSPL2	ENSG00000137770
hsa-miR-155-5p	DCUN1D3	ENSG00000188215
hsa-miR-155-5p	PKIA	ENSG00000171033
hsa-miR-155-5p	PANK1	ENSG00000152782
hsa-miR-155-5p	ADNP2	ENSG00000101544
hsa-miR-155-5p	AKAP10	ENSG00000108599
hsa-miR-155-5p	MON1A	ENSG00000164077
hsa-miR-155-5p	PANK1	ENSG00000152782
hsa-miR-155-5p	WEE1	ENSG00000166483
hsa-miR-155-5p	UBQLN1	ENSG00000135018
hsa-miR-155-5p	CARHSP1	ENSG00000153048
hsa-miR-155-5p	CD47	ENSG00000196776
hsa-miR-155-5p	PCDH9	ENSG00000184226
hsa-miR-155-5p	RSPO2	ENSG00000147655
hsa-miR-155-5p	KCNN3	ENSG00000143603
hsa-miR-155-5p	SP3	ENSG00000172845
hsa-miR-155-5p	CEBPB	ENSG00000172216
hsa-miR-155-5p	SMARCA4	ENSG00000127616
hsa-miR-155-5p	KRAS	ENSG00000133703
hsa-miR-155-5p	UBQLN2	ENSG00000188021
hsa-miR-155-5p	RAB11FIP2	ENSG00000107560
hsa-miR-155-5p	NAV3	ENSG00000067798
hsa-miR-155-5p	PKIA	ENSG00000171033
hsa-miR-155-5p	UPP2	ENSG00000007001
hsa-miR-155-5p	SMNDC1	ENSG00000119953
hsa-miR-155-5p	TLE4	ENSG00000106829
hsa-miR-155-5p	NFAT5	ENSG00000102908
hsa-miR-155-5p	TRIM2	ENSG00000109654
hsa-miR-155-5p	KPNA1	ENSG00000114030
hsa-miR-155-5p	SGCB	ENSG00000163069
hsa-miR-155-5p	SGK3	ENSG00000104205
hsa-miR-155-5p	NFAT5	ENSG00000102908
hsa-miR-155-5p	APC	ENSG00000134982
hsa-miR-155-5p	RAB6A	ENSG00000175582
hsa-miR-155-5p	PANK1	ENSG00000152782
hsa-miR-155-5p	ARL5B	ENSG00000165997
hsa-miR-155-5p	CSNK1A1	ENSG00000113712
hsa-miR-155-5p	PLAG1	ENSG00000181690
hsa-miR-155-5p	CELF2	ENSG00000048740
hsa-miR-155-5p	SUFU	ENSG00000107882
hsa-miR-155-5p	YWHAE	ENSG00000108953
hsa-miR-155-5p	SYPL1	ENSG00000008282
hsa-miR-155-5p	WDFY3	ENSG00000163625
hsa-miR-155-5p	HDAC4	ENSG00000068024
hsa-miR-155-5p	ZBTB18	ENSG00000179456
hsa-miR-155-5p	CREBRF	ENSG00000164463
hsa-miR-155-5p	SSH2	ENSG00000141298
hsa-miR-155-5p	SKI	ENSG00000157933
hsa-miR-155-5p	RAPGEF4	ENSG00000091428
hsa-miR-155-5p	FBXO33	ENSG00000165355
hsa-miR-155-5p	IKBKE	ENSG00000263528
hsa-miR-155-5p	ATP2B1	ENSG00000070961
hsa-miR-155-5p	ACTA1	ENSG00000143632
hsa-miR-155-5p	SF3B1	ENSG00000115524
hsa-miR-155-5p	SLA	ENSG00000155926
hsa-miR-155-5p	ELL2	ENSG00000118985
hsa-miR-155-5p	OLFML3	ENSG00000116774
hsa-miR-155-5p	ZBTB18	ENSG00000179456
hsa-miR-155-5p	RNF111	ENSG00000157450
hsa-miR-155-5p	ITK	ENSG00000113263
hsa-miR-155-5p	RAB1A	ENSG00000138069
hsa-miR-155-5p	RCN2	ENSG00000117906
hsa-miR-155-5p	TFDP2	ENSG00000114126
hsa-miR-155-5p	CNTN4	ENSG00000144619
hsa-miR-155-5p	VEZF1	ENSG00000136451
hsa-miR-155-5p	ANTXR2	ENSG00000163297
hsa-miR-155-5p	AHCYL2	ENSG00000158467
hsa-miR-155-5p	TAB2	ENSG00000228408
hsa-miR-155-5p	TAB2	ENSG00000055208
hsa-miR-155-5p	RBM47	ENSG00000163694
hsa-miR-155-5p	DCUN1D4	ENSG00000109184
hsa-miR-155-5p	HBP1	ENSG00000105856
hsa-miR-155-5p	CD47	ENSG00000196776
hsa-miR-155-5p	FGF7	ENSG00000140285
hsa-miR-155-5p	ENTPD7	ENSG00000198018
hsa-miR-155-5p	ARL15	ENSG00000185305
hsa-miR-155-5p	H3F3A	ENSG00000163041
hsa-miR-155-5p	CHD7	ENSG00000171316
hsa-miR-155-5p	CNTN4	ENSG00000144619
hsa-miR-155-5p	AICDA	ENSG00000111732
hsa-miR-155-5p	ATP2B1	ENSG00000070961
hsa-miR-155-5p	CACNA1C	ENSG00000151067
hsa-miR-155-5p	CEP41	ENSG00000106477
hsa-miR-155-5p	FAM134C	ENSG00000141699
hsa-miR-155-5p	NOVA1	ENSG00000139910
hsa-miR-155-5p	GOLPH3L	ENSG00000143457
hsa-miR-155-5p	BOC	ENSG00000144857
hsa-miR-155-5p	INPP5D	ENSG00000168918
hsa-miR-155-5p	HIF1A	ENSG00000100644
hsa-miR-155-5p	RNF146	ENSG00000118518
hsa-miR-155-5p	C3orf18	ENSG00000088543
hsa-miR-155-5p	RNF123	ENSG00000164068
hsa-miR-155-5p	ARVCF	ENSG00000099889
hsa-miR-155-5p	ZNF644	ENSG00000122482
hsa-miR-155-5p	ASTN2	ENSG00000148219
hsa-miR-155-5p	ASTN2	ENSG00000148219
hsa-miR-155-5p	MECP2	ENSG00000169057
hsa-miR-155-5p	PELI1	ENSG00000197329
hsa-miR-155-5p	CEP192	ENSG00000101639
hsa-miR-155-5p	KRAS	ENSG00000133703
hsa-miR-155-5p	EHD1	ENSG00000110047
hsa-miR-155-5p	TSHZ3	ENSG00000121297
hsa-miR-155-5p	GPR85	ENSG00000164604
hsa-miR-155-5p	C10orf12	ENSG00000196233
hsa-miR-155-5p	C5orf64	ENSG00000178722
hsa-miR-155-5p	WWC1	ENSG00000113645
hsa-miR-155-5p	KANSL1	ENSG00000120071
hsa-miR-155-5p	CDC73	ENSG00000134371
hsa-miR-155-5p	ASTN2	ENSG00000148219
hsa-miR-155-5p	DNAJB7	ENSG00000172404
hsa-miR-155-5p	CLINT1	ENSG00000113282
hsa-miR-155-5p	WT1-AS	ENSG00000183242
hsa-miR-155-5p	YWHAZ	ENSG00000164924
hsa-miR-155-5p	TOMM20	ENSG00000173726
hsa-miR-155-5p	ETNK2	ENSG00000143845
hsa-miR-155-5p	BCAT1	ENSG00000060982
hsa-miR-155-5p	NUFIP2	ENSG00000108256
hsa-miR-155-5p	ZNF644	ENSG00000122482
hsa-miR-155-5p	SEMA5A	ENSG00000112902
hsa-miR-155-5p	MAP3K10	ENSG00000130758
hsa-miR-155-5p	UBE2W	ENSG00000104343
hsa-miR-155-5p	TSPAN14	ENSG00000108219
hsa-miR-155-5p	ETS1	ENSG00000134954
hsa-miR-155-5p	FBXO11	ENSG00000138081
hsa-miR-155-5p	MAP3K14	ENSG00000006062
hsa-miR-155-5p	LRP1B	ENSG00000168702
hsa-miR-155-5p	BRD1	ENSG00000100425
hsa-miR-155-5p	ARNTL	ENSG00000133794
hsa-miR-155-5p	SALL1	ENSG00000103449
hsa-miR-155-5p	NDFIP1	ENSG00000131507
hsa-miR-155-5p	SDCBP	ENSG00000137575
hsa-miR-155-5p	DYNC1I1	ENSG00000158560
hsa-miR-155-5p	WDFY3	ENSG00000163625
hsa-miR-155-5p	KDM3A	ENSG00000115548
hsa-miR-155-5p	KBTBD2	ENSG00000170852
hsa-miR-155-5p	CSNK1G2	ENSG00000133275
hsa-miR-155-5p	MYO10	ENSG00000145555
hsa-miR-155-5p	BCL11A	ENSG00000119866
hsa-miR-155-5p	ZIC3	ENSG00000156925
hsa-miR-155-5p	SATB1	ENSG00000182568
hsa-miR-155-5p	TP53INP1	ENSG00000164938
hsa-miR-155-5p	SEPT11	ENSG00000138758
hsa-miR-155-5p	KCNN3	ENSG00000143603
hsa-miR-155-5p	CTLA4	ENSG00000163599
hsa-miR-155-5p	LCORL	ENSG00000178177
hsa-miR-155-5p	YWHAZ	ENSG00000164924
hsa-miR-130a-3p	PEX5L	ENSG00000114757
hsa-miR-130a-3p	LBR	ENSG00000143815
hsa-miR-130a-3p	GADD45A	ENSG00000116717
hsa-miR-130a-3p	DYRK1B	ENSG00000105204
hsa-miR-130a-3p	DYRK1B	ENSG00000105204
hsa-miR-130a-3p	PUF60	ENSG00000179950
hsa-miR-130a-3p	ATRX	ENSG00000085224
hsa-miR-130a-3p	ATRX	ENSG00000085224
hsa-miR-130a-3p	RUNX3	ENSG00000020633
hsa-miR-130a-3p	ITGA11	ENSG00000137809
hsa-miR-130a-3p	HMGB3	ENSG00000029993
hsa-miR-130a-3p	ENPP5	ENSG00000112796
hsa-miR-130a-3p	ELMO1	ENSG00000155849
hsa-miR-130a-3p	LRP8	ENSG00000157193
hsa-miR-130a-3p	BHLHE41	ENSG00000123095
hsa-miR-130a-3p	C1orf168	ENSG00000187889
hsa-miR-130a-3p	TXNIP	ENSG00000265972
hsa-miR-130a-3p	DYNLL2	ENSG00000264364
hsa-miR-130a-3p	NR2C2AP	ENSG00000184162
hsa-miR-130a-3p	RAI2	ENSG00000131831
hsa-miR-130a-3p	NRP2	ENSG00000118257
hsa-miR-130a-3p	STXBP5	ENSG00000164506
hsa-miR-130a-3p	PRICKLE2	ENSG00000163637
hsa-miR-130a-3p	FAM104A	ENSG00000133193
hsa-miR-130a-3p	TERB1	ENSG00000249961
hsa-miR-130a-3p	MIGA1	ENSG00000180488
hsa-miR-130a-3p	SOCS6	ENSG00000170677
hsa-miR-130a-3p	LSM14A	ENSG00000257103
hsa-miR-130a-3p	SLF2	ENSG00000119906
hsa-miR-130a-3p	KMT5B	ENSG00000110066
hsa-miR-130a-3p	KBTBD8	ENSG00000163376
hsa-miR-130a-3p	ESRRG	ENSG00000196482
hsa-miR-130a-3p	ESRRG	ENSG00000196482
hsa-miR-130a-3p	BTBD3	ENSG00000132640
hsa-miR-130a-3p	CNIH1	ENSG00000100528
hsa-miR-130a-3p	CEP120	ENSG00000168944
hsa-miR-130a-3p	PRR5L	ENSG00000135362
hsa-miR-130a-3p	ZFYVE9	ENSG00000157077
hsa-miR-130a-3p	MAFB	ENSG00000204103
hsa-miR-130a-3p	CYTH3	ENSG00000008256
hsa-miR-130a-3p	PDGFRA	ENSG00000134853
hsa-miR-130a-3p	EPN2	ENSG00000072134
hsa-miR-130a-3p	TBC1D8	ENSG00000204634
hsa-miR-130a-3p	BMPR2	ENSG00000204217
hsa-miR-130a-3p	MYB	ENSG00000118513
hsa-miR-130a-3p	LDLRAD4	ENSG00000168675
hsa-miR-130a-3p	S1PR1	ENSG00000170989
hsa-miR-130a-3p	PAN3	ENSG00000152520
hsa-miR-130a-3p	SH2B3	ENSG00000111252
hsa-miR-130a-3p	INO80	ENSG00000128908
hsa-miR-130a-3p	PPP1R12A	ENSG00000058272
hsa-miR-130a-3p	KLF4	ENSG00000136826
hsa-miR-130a-3p	ARHGAP21	ENSG00000107863
hsa-miR-130a-3p	GLRX5	ENSG00000182512
hsa-miR-130a-3p	MOSPD1	ENSG00000101928
hsa-miR-130a-3p	CBFB	ENSG00000067955
hsa-miR-130a-3p	KIT	ENSG00000157404
hsa-miR-130a-3p	POU4F1	ENSG00000152192
hsa-miR-130a-3p	FAM46B	ENSG00000158246
hsa-miR-130a-3p	SOCS5	ENSG00000171150
hsa-miR-130a-3p	CHRD	ENSG00000090539
hsa-miR-130a-3p	ARHGAP1	ENSG00000175220
hsa-miR-130a-3p	CHRD	ENSG00000090539
hsa-miR-130a-3p	ESR1	ENSG00000091831
hsa-miR-130a-3p	AGO4	ENSG00000134698
hsa-miR-130a-3p	ATXN1	ENSG00000124788
hsa-miR-130a-3p	BAZ2A	ENSG00000076108
hsa-miR-130a-3p	ARID4B	ENSG00000054267
hsa-miR-130a-3p	MNT	ENSG00000070444
hsa-miR-130a-3p	AKAP7	ENSG00000118507
hsa-miR-130a-3p	AP1G1	ENSG00000166747
hsa-miR-130a-3p	GPRC5B	ENSG00000167191
hsa-miR-130a-3p	NLK	ENSG00000087095
hsa-miR-130a-3p	M6PR	ENSG00000003056
hsa-miR-130a-3p	YTHDF2	ENSG00000198492
hsa-miR-130a-3p	NBEA	ENSG00000172915
hsa-miR-130a-3p	ARRDC3	ENSG00000113369
hsa-miR-130a-3p	LRRC37A11P	ENSG00000214553
hsa-miR-130a-3p	ATG16L1	ENSG00000085978
hsa-miR-130a-3p	SIRT7	ENSG00000187531
hsa-miR-130a-3p	ZNF800	ENSG00000048405
hsa-miR-130a-3p	SMC4	ENSG00000113810
hsa-miR-130a-3p	BTG1	ENSG00000133639
hsa-miR-130a-3p	LDLRAD4	ENSG00000168675
hsa-miR-130a-3p	TRIM3	ENSG00000110171
hsa-miR-130a-3p	LRIG1	ENSG00000144749
hsa-miR-130a-3p	ERLIN1	ENSG00000107566
hsa-miR-130a-3p	CPEB4	ENSG00000113742
hsa-miR-130a-3p	SNIP1	ENSG00000163877
hsa-miR-130a-3p	ITPR1	ENSG00000150995
hsa-miR-130a-3p	LDLRAD4	ENSG00000168675
hsa-miR-130a-3p	LDLRAD4	ENSG00000168675
hsa-miR-130a-3p	NHLH2	ENSG00000177551
hsa-miR-130a-3p	ZBTB18	ENSG00000179456
hsa-miR-130a-3p	FAM155B	ENSG00000130054
hsa-miR-130a-3p	PCDH10	ENSG00000138650
hsa-miR-130a-3p	CANX	ENSG00000127022
hsa-miR-130a-3p	C16orf70	ENSG00000125149
hsa-miR-130a-3p	DOCK6	ENSG00000130158
hsa-miR-130a-3p	ABHD3	ENSG00000158201
hsa-miR-130a-3p	RAPGEF4	ENSG00000091428
hsa-miR-130a-3p	MAX	ENSG00000125952
hsa-miR-130a-3p	CALM2	ENSG00000143933
hsa-miR-130a-3p	ACVR1	ENSG00000115170
hsa-miR-130a-3p	PRKAA1	ENSG00000132356
hsa-miR-130a-3p	NME7	ENSG00000143156
hsa-miR-130a-3p	ZBTB18	ENSG00000179456
hsa-miR-130a-3p	PTGFRN	ENSG00000134247
hsa-miR-130a-3p	AMPD3	ENSG00000133805
hsa-miR-130a-3p	GJA1	ENSG00000152661
hsa-miR-130a-3p	ZFC3H1	ENSG00000133858
hsa-miR-130a-3p	G3BP2	ENSG00000138757
hsa-miR-130a-3p	SNPH	ENSG00000101298
hsa-miR-130a-3p	G3BP2	ENSG00000138757
hsa-miR-130a-3p	MAF1	ENSG00000179632
hsa-miR-130a-3p	PRKAA1	ENSG00000132356
hsa-miR-130a-3p	PRKD3	ENSG00000115825
hsa-miR-130a-3p	MTMR14	ENSG00000163719
hsa-miR-130a-3p	ITGA5	ENSG00000161638
hsa-miR-130a-3p	PTPRM	ENSG00000173482
hsa-miR-130a-3p	RASD1	ENSG00000108551
hsa-miR-130a-3p	ARL8B	ENSG00000134108
hsa-miR-130a-3p	PTPRG	ENSG00000144724
hsa-miR-130a-3p	PPP1CB	ENSG00000213639
hsa-miR-130a-3p	ITSN2	ENSG00000198399
hsa-miR-130a-3p	TMSB10	ENSG00000034510
hsa-miR-130a-3p	KIAA1217	ENSG00000120549
hsa-miR-130a-3p	SFMBT1	ENSG00000163935
hsa-miR-130a-3p	GPCPD1	ENSG00000125772
hsa-miR-130a-3p	SFMBT1	ENSG00000163935
hsa-miR-130a-3p	TMSB4X	ENSG00000205542
hsa-miR-130a-3p	NEUROD1	ENSG00000162992
hsa-miR-130a-3p	FAM179B	ENSG00000198718
hsa-miR-130a-3p	CCDC88A	ENSG00000115355
hsa-miR-130a-3p	CFL2	ENSG00000165410
hsa-miR-130a-3p	ZNRF1	ENSG00000186187
hsa-miR-130a-3p	SNX5	ENSG00000089006
hsa-miR-130a-3p	EPC2	ENSG00000135999
hsa-miR-130a-3p	MLEC	ENSG00000110917
hsa-miR-130a-3p	ITSN2	ENSG00000198399
hsa-miR-130a-3p	FBXL19	ENSG00000099364
hsa-miR-130a-3p	CAMTA1	ENSG00000171735
hsa-miR-130a-3p	SPG20	ENSG00000133104
hsa-miR-130a-3p	PPP1R10	ENSG00000204569
hsa-miR-130a-3p	C1GALT1	ENSG00000106392
hsa-miR-130a-3p	CLCN5	ENSG00000171365
hsa-miR-130a-3p	GOLT1B	ENSG00000111711
hsa-miR-130a-3p	CHMP3	ENSG00000115561
hsa-miR-130a-3p	COL19A1	ENSG00000082293
hsa-miR-130a-3p	ACSL1	ENSG00000151726
hsa-miR-130a-3p	ARHGEF12	ENSG00000196914
hsa-miR-130a-3p	MEOX2	ENSG00000106511
hsa-miR-130a-3p	WNK3	ENSG00000196632
hsa-miR-130a-3p	GPM6A	ENSG00000150625
hsa-miR-130a-3p	CYLD	ENSG00000083799
hsa-miR-130a-3p	COL2A1	ENSG00000139219
hsa-miR-130a-3p	DEDD	ENSG00000158796
hsa-miR-130a-3p	PMEPA1	ENSG00000124225
hsa-miR-130a-3p	RALBP1	ENSG00000017797
hsa-miR-130a-3p	PMEPA1	ENSG00000124225
hsa-miR-130a-3p	IKZF4	ENSG00000123411
hsa-miR-130a-3p	CNOT7	ENSG00000198791
hsa-miR-130a-3p	USP32	ENSG00000170832
hsa-miR-130a-3p	SPHK2	ENSG00000063176
hsa-miR-130a-3p	PMEPA1	ENSG00000124225
hsa-miR-130a-3p	CDK19	ENSG00000155111
hsa-miR-130a-3p	SPRY3	ENSG00000168939
hsa-miR-130a-3p	ROBO1	ENSG00000169855
hsa-miR-130a-3p	BLCAP	ENSG00000166619
hsa-miR-130a-3p	MAML1	ENSG00000161021
hsa-miR-130a-3p	CHMP3	ENSG00000115561
hsa-miR-130a-3p	MTMR12	ENSG00000150712
hsa-miR-130a-3p	TGIF2	ENSG00000118707
hsa-miR-130a-3p	MAP3K9	ENSG00000006432
hsa-miR-130a-3p	ANK2	ENSG00000145362
hsa-miR-130a-3p	GSE1	ENSG00000131149
hsa-miR-130a-3p	KANSL1	ENSG00000120071
hsa-miR-130a-3p	ADCY1	ENSG00000164742
hsa-miR-130a-3p	PATL1	ENSG00000166889
hsa-miR-130a-3p	IER3IP1	ENSG00000134049
hsa-miR-130a-3p	IER3IP1	ENSG00000267228
hsa-miR-130a-3p	SMAD5	ENSG00000113658
hsa-miR-130a-3p	MIER1	ENSG00000198160
hsa-miR-130a-3p	VGLL4	ENSG00000144560
hsa-miR-130a-3p	WDR1	ENSG00000071127
hsa-miR-130a-3p	TRAK2	ENSG00000115993
hsa-miR-130a-3p	LBR	ENSG00000143815
hsa-miR-130a-3p	ERRFI1	ENSG00000116285
hsa-miR-130a-3p	MID1IP1	ENSG00000165175
hsa-miR-130a-3p	AKAP1	ENSG00000121057
hsa-miR-130a-3p	ROBO1	ENSG00000169855
hsa-miR-130a-3p	BTBD3	ENSG00000132640
hsa-miR-130a-3p	TMEM110	ENSG00000213533
hsa-miR-130a-3p	MTF1	ENSG00000188786
hsa-miR-130a-3p	EPN2	ENSG00000072134
hsa-miR-130a-3p	WDR47	ENSG00000085433
hsa-miR-130a-3p	SMOC1	ENSG00000198732
hsa-miR-130a-3p	NME7	ENSG00000143156
hsa-miR-130a-3p	SMOC2	ENSG00000112562
hsa-miR-130a-3p	RBM24	ENSG00000112183
hsa-miR-130a-3p	DNER	ENSG00000187957
hsa-miR-130a-3p	DCBLD2	ENSG00000057019
hsa-miR-130a-3p	WNK3	ENSG00000196632
hsa-miR-130a-3p	CLIP1	ENSG00000130779
hsa-miR-130a-3p	PPARG	ENSG00000132170
hsa-miR-130a-3p	RNF38	ENSG00000137075
hsa-miR-130a-3p	R3HDM1	ENSG00000048991
hsa-miR-130a-3p	FASTK	ENSG00000164896
hsa-miR-130a-3p	RNF38	ENSG00000137075
hsa-miR-130a-3p	LRRC55	ENSG00000183908
hsa-miR-130a-3p	RNF38	ENSG00000137075
hsa-miR-130a-3p	FAM13B	ENSG00000031003
hsa-miR-130a-3p	FAM234A	ENSG00000167930
hsa-miR-130a-3p	FAM234A	ENSG00000269881
hsa-miR-130a-3p	RGMA	ENSG00000182175
hsa-miR-130a-3p	FSTL5	ENSG00000168843
hsa-miR-130a-3p	MAP3K14	ENSG00000006062
hsa-miR-130a-3p	ULK2	ENSG00000083290
hsa-miR-130a-3p	ST18	ENSG00000147488
hsa-miR-130a-3p	CNOT6	ENSG00000113300
hsa-miR-130a-3p	LONRF1	ENSG00000154359
hsa-miR-130a-3p	SEPT4	ENSG00000108387
hsa-miR-130a-3p	ACBD5	ENSG00000107897
hsa-miR-130a-3p	RNF38	ENSG00000137075
hsa-miR-130a-3p	RNF38	ENSG00000137075
hsa-miR-130a-3p	ANKRD12	ENSG00000101745
hsa-miR-130a-3p	EDA	ENSG00000158813
hsa-miR-130a-3p	WDFY3	ENSG00000163625
hsa-miR-130a-3p	ERBB4	ENSG00000178568
hsa-miR-130a-3p	ARHGEF17	ENSG00000110237
hsa-miR-130a-3p	ELK3	ENSG00000111145
hsa-miR-130a-3p	ST8SIA3	ENSG00000177511
hsa-miR-130a-3p	GAP43	ENSG00000172020
hsa-miR-130a-3p	MDFIC	ENSG00000135272
hsa-miR-130a-3p	JAKMIP1	ENSG00000152969
hsa-miR-130a-3p	PPARG	ENSG00000132170
hsa-miR-130a-3p	COL2A1	ENSG00000139219
hsa-miR-130a-3p	E2F3	ENSG00000112242
hsa-miR-130a-3p	RNF145	ENSG00000145860
hsa-miR-130a-3p	TSPYL2	ENSG00000184205
hsa-miR-130a-3p	SLC25A44	ENSG00000160785
hsa-miR-130a-3p	USP33	ENSG00000077254
hsa-miR-130a-3p	TARDBP	ENSG00000120948
hsa-miR-130a-3p	ZEB2	ENSG00000169554
hsa-miR-130a-3p	TP53INP1	ENSG00000164938
hsa-miR-130a-3p	SLC44A1	ENSG00000070214
hsa-miR-130a-3p	TRIM3	ENSG00000110171
hsa-miR-130a-3p	BTBD7	ENSG00000011114
hsa-miR-130a-3p	NPNT	ENSG00000168743
hsa-miR-130a-3p	ATRX	ENSG00000085224
hsa-miR-130a-3p	TESK2	ENSG00000070759
hsa-miR-130a-3p	BTAF1	ENSG00000095564
hsa-miR-130a-3p	GRM7	ENSG00000196277
hsa-miR-130a-3p	ARGLU1	ENSG00000134884
hsa-miR-130a-3p	DSEL	ENSG00000171451
hsa-miR-130a-3p	SPEN	ENSG00000065526
hsa-miR-130a-3p	INHBB	ENSG00000163083
hsa-miR-130a-3p	OTX1	ENSG00000115507
hsa-miR-130a-3p	BAHD1	ENSG00000140320
hsa-miR-130a-3p	GDF6	ENSG00000156466
hsa-miR-130a-3p	IRF1	ENSG00000125347
hsa-miR-130a-3p	PGM2L1	ENSG00000165434
hsa-miR-130a-3p	SGMS1	ENSG00000198964
hsa-miR-130a-3p	ELF5	ENSG00000135374
hsa-miR-130a-3p	RTN1	ENSG00000139970
hsa-miR-130a-3p	YPEL3	ENSG00000090238
hsa-miR-130a-3p	QKI	ENSG00000112531
hsa-miR-130a-3p	NAA15	ENSG00000164134
hsa-miR-130a-3p	ZNF3	ENSG00000166526
hsa-miR-130a-3p	POU3F2	ENSG00000184486
hsa-miR-130a-3p	SOCS5	ENSG00000171150
hsa-miR-130a-3p	CCDC126	ENSG00000169193
hsa-miR-130a-3p	STC1	ENSG00000159167
hsa-miR-130a-3p	HIVEP2	ENSG00000010818
hsa-miR-130a-3p	FOSB	ENSG00000125740
hsa-miR-130a-3p	NEURL4	ENSG00000215041
hsa-miR-130a-3p	SPTY2D1	ENSG00000179119
hsa-miR-130a-3p	CAMK2A	ENSG00000070808
hsa-miR-130a-3p	RTN1	ENSG00000139970
hsa-miR-130a-3p	MED12L	ENSG00000144893
hsa-miR-130a-3p	LRP8	ENSG00000157193
hsa-miR-130a-3p	QKI	ENSG00000112531
hsa-miR-130a-3p	QKI	ENSG00000112531
hsa-miR-130a-3p	TGFA	ENSG00000163235
hsa-miR-130a-3p	ASXL2	ENSG00000143970
hsa-miR-130a-3p	OTUD4	ENSG00000164164
hsa-miR-130a-3p	EFNB2	ENSG00000125266
hsa-miR-130a-3p	C18orf25	ENSG00000152242
hsa-miR-130a-3p	RAB5B	ENSG00000111540
hsa-miR-130a-3p	EMX2	ENSG00000170370
hsa-miR-130a-3p	SOX5	ENSG00000134532
hsa-miR-130a-3p	GPATCH8	ENSG00000186566
hsa-miR-130a-3p	UBE2D1	ENSG00000072401
hsa-miR-130a-3p	WNT2B	ENSG00000134245
hsa-miR-130a-3p	SSR1	ENSG00000124783
hsa-miR-130a-3p	UBE2D2	ENSG00000131508
hsa-miR-130a-3p	LDLRAD4	ENSG00000168675
hsa-miR-130a-3p	LDLRAD4	ENSG00000168675
hsa-miR-130a-3p	CENPO	ENSG00000138092
hsa-miR-130a-3p	SCAF11	ENSG00000139218
hsa-miR-130a-3p	XPO4	ENSG00000132953
hsa-miR-130a-3p	LTBP1	ENSG00000049323
hsa-miR-130a-3p	MB21D2	ENSG00000180611
hsa-miR-130a-3p	BPTF	ENSG00000171634
hsa-miR-130a-3p	ADAM12	ENSG00000148848
hsa-miR-130a-3p	SEL1L3	ENSG00000091490
hsa-miR-130a-3p	DYRK1B	ENSG00000105204
hsa-miR-130a-3p	ADAMTS18	ENSG00000140873
hsa-miR-130a-3p	RTN1	ENSG00000139970
hsa-miR-130a-3p	SNX27	ENSG00000143376
hsa-miR-130a-3p	PPP1CB	ENSG00000213639
hsa-miR-130a-3p	CBFB	ENSG00000067955
hsa-miR-130a-3p	HOXA5	ENSG00000106004
hsa-miR-130a-3p	CHST1	ENSG00000175264
hsa-miR-130a-3p	FASTK	ENSG00000164896
hsa-miR-130a-3p	USP48	ENSG00000090686
hsa-miR-130a-3p	HOXC8	ENSG00000037965
hsa-miR-130a-3p	PLCB1	ENSG00000182621
hsa-miR-130a-3p	CDC14A	ENSG00000079335
hsa-miR-130a-3p	TP63	ENSG00000073282
hsa-miR-130a-3p	BTBD10	ENSG00000148925
hsa-miR-130a-3p	NIPA1	ENSG00000170113
hsa-miR-130a-3p	ARHGAP12	ENSG00000165322
hsa-miR-130a-3p	CFL2	ENSG00000165410
hsa-miR-130a-3p	ZFP91	ENSG00000186660
hsa-miR-130a-3p	ZFP91	ENSG00000255073
hsa-miR-130a-3p	SMAD5	ENSG00000113658
hsa-miR-130a-3p	AKAP7	ENSG00000118507
hsa-miR-130a-3p	SOX21	ENSG00000125285
hsa-miR-130a-3p	SLAIN1	ENSG00000139737
hsa-miR-130a-3p	PTP4A1	ENSG00000112245
hsa-miR-130a-3p	ATG14	ENSG00000126775
hsa-miR-130a-3p	PPP1CB	ENSG00000213639
hsa-miR-130a-3p	NPTN	ENSG00000156642
hsa-miR-130a-3p	STK33	ENSG00000130413
hsa-miR-130a-3p	SNX5	ENSG00000089006
hsa-miR-130a-3p	KLF13	ENSG00000169926
hsa-miR-130a-3p	USP6	ENSG00000129204
hsa-miR-130a-3p	MDGA2	ENSG00000139915
hsa-miR-130a-3p	AGFG1	ENSG00000173744
hsa-miR-130a-3p	PNPLA6	ENSG00000032444
hsa-miR-130a-3p	SNAP25	ENSG00000132639
hsa-miR-130a-3p	MAT2B	ENSG00000038274
hsa-miR-130a-3p	ARHGAP35	ENSG00000160007
hsa-miR-130a-3p	G3BP2	ENSG00000138757
hsa-miR-130a-3p	LMTK2	ENSG00000164715
hsa-miR-130a-3p	ARL6IP1	ENSG00000170540
hsa-miR-130a-3p	WEE1	ENSG00000166483
hsa-miR-130a-3p	TMED7	ENSG00000134970
hsa-miR-130a-3p	UBE2W	ENSG00000104343
hsa-miR-130a-3p	WHSC1	ENSG00000109685
hsa-miR-130a-3p	UBE2D2	ENSG00000131508
hsa-miR-130a-3p	LRP8	ENSG00000157193
hsa-miR-130a-3p	TEAD1	ENSG00000187079
hsa-miR-130a-3p	WNT10B	ENSG00000169884
hsa-miR-130a-3p	SMAD5	ENSG00000113658
hsa-miR-130a-3p	BRPF1	ENSG00000156983
hsa-miR-130a-3p	PSAP	ENSG00000197746
hsa-miR-130a-3p	PSD	ENSG00000059915
hsa-miR-130a-3p	USP32P2	ENSG00000233327
hsa-miR-130a-3p	CLIP1	ENSG00000130779
hsa-miR-130a-3p	SOX4	ENSG00000124766
hsa-miR-130a-3p	NRP1	ENSG00000099250
hsa-miR-130a-3p	CD69	ENSG00000110848
hsa-miR-130a-3p	BRPF1	ENSG00000156983
hsa-miR-130a-3p	MLLT10	ENSG00000078403
hsa-miR-130a-3p	CEP170	ENSG00000143702
hsa-miR-130a-3p	PMEPA1	ENSG00000124225
hsa-miR-130a-3p	TRPS1	ENSG00000104447
hsa-miR-130a-3p	DPYSL2	ENSG00000092964
hsa-miR-130a-3p	GRM7	ENSG00000196277
hsa-miR-130a-3p	SMARCD2	ENSG00000108604
hsa-miR-130a-3p	MARCH2	ENSG00000099785
hsa-miR-130a-3p	MARCH2	ENSG00000099785
hsa-miR-130a-3p	AKAP1	ENSG00000121057
hsa-miR-130a-3p	PAK6	ENSG00000137843
hsa-miR-130a-3p	FBXO28	ENSG00000143756
hsa-miR-130a-3p	ANK2	ENSG00000145362
hsa-miR-130a-3p	BMPR2	ENSG00000204217
hsa-miR-130a-3p	SULF1	ENSG00000137573
hsa-miR-130a-3p	BACH2	ENSG00000112182
hsa-miR-130a-3p	AGO1	ENSG00000092847
hsa-miR-130a-3p	TRIM2	ENSG00000109654
hsa-miR-130a-3p	PPARG	ENSG00000132170
hsa-miR-130a-3p	RNF44	ENSG00000146083
hsa-miR-130a-3p	KIAA1324L	ENSG00000164659
hsa-miR-130a-3p	SASH1	ENSG00000111961
hsa-miR-130a-3p	CDK5R1	ENSG00000176749
hsa-miR-130a-3p	PPARG	ENSG00000132170
hsa-miR-130a-3p	ACSL4	ENSG00000068366
hsa-miR-130a-3p	NEURL4	ENSG00000215041
hsa-miR-130a-3p	LTBP1	ENSG00000049323
hsa-miR-130a-3p	CSF1	ENSG00000184371
hsa-miR-130a-3p	ERBIN	ENSG00000112851
hsa-miR-130a-3p	TMEM266	ENSG00000169758
hsa-miR-130a-3p	SNX2	ENSG00000205302
hsa-miR-130a-3p	PPARGC1A	ENSG00000109819
hsa-miR-130a-3p	DNMT1	ENSG00000130816
hsa-miR-130a-3p	ELMO1	ENSG00000155849
hsa-miR-130a-3p	OGT	ENSG00000147162
hsa-miR-130a-3p	ARPP19	ENSG00000128989
hsa-miR-130a-3p	CUL5	ENSG00000166266
hsa-miR-130a-3p	RAP2C	ENSG00000123728
hsa-miR-130a-3p	PDK4	ENSG00000004799
hsa-miR-130a-3p	RPS6KA5	ENSG00000100784
hsa-miR-130a-3p	RNF165	ENSG00000141622
hsa-miR-130a-3p	TSPOAP1	ENSG00000005379
hsa-miR-130a-3p	MARCH3	ENSG00000173926
hsa-miR-130a-3p	C5orf30	ENSG00000181751
hsa-miR-130a-3p	SYNJ1	ENSG00000159082
hsa-miR-130a-3p	MBNL1	ENSG00000152601
hsa-miR-130a-3p	CAMK2A	ENSG00000070808
hsa-miR-130a-3p	WDFY3	ENSG00000163625
hsa-miR-130a-3p	SPATA2	ENSG00000158480
hsa-miR-130a-3p	RAB35	ENSG00000111737
hsa-miR-130a-3p	SKP1	ENSG00000113558
hsa-miR-130a-3p	PHF3	ENSG00000118482
hsa-miR-130a-3p	DIP2A	ENSG00000160305
hsa-miR-130a-3p	CLOCK	ENSG00000134852
hsa-miR-130a-3p	RSBN1L	ENSG00000187257
hsa-miR-130a-3p	BCL7A	ENSG00000110987
hsa-miR-130a-3p	TNPO3	ENSG00000064419
hsa-miR-130a-3p	FBXO33	ENSG00000165355
hsa-miR-130a-3p	CSMD1	ENSG00000183117
hsa-miR-130a-3p	NHS	ENSG00000188158
hsa-miR-130a-3p	ARID4B	ENSG00000054267
hsa-miR-130a-3p	UCP3	ENSG00000175564
hsa-miR-130a-3p	PLCB1	ENSG00000182621
hsa-miR-130a-3p	SLC24A3	ENSG00000185052
hsa-miR-130a-3p	EDA	ENSG00000158813
hsa-miR-130a-3p	SNN	ENSG00000184602
hsa-miR-130a-3p	TOMM70	ENSG00000154174
hsa-miR-130a-3p	ZFPM2	ENSG00000169946
hsa-miR-130a-3p	PIK3R3	ENSG00000117461
hsa-miR-130a-3p	PIK3R3	ENSG00000278139
hsa-miR-130a-3p	GPM6A	ENSG00000150625
hsa-miR-130a-3p	MEMO1	ENSG00000162959
hsa-miR-130a-3p	GPM6A	ENSG00000150625
hsa-miR-130a-3p	PAPD4	ENSG00000164329
hsa-miR-130a-3p	NR3C2	ENSG00000151623
hsa-miR-130a-3p	YWHAB	ENSG00000166913
hsa-miR-130a-3p	RAB5A	ENSG00000144566
hsa-miR-130a-3p	ZNF217	ENSG00000171940
hsa-miR-130a-3p	ATRN	ENSG00000088812
hsa-miR-130a-3p	RASSF1	ENSG00000068028
hsa-miR-130a-3p	RASSF1	ENSG00000068028
hsa-miR-130a-3p	SOX5	ENSG00000134532
hsa-miR-130a-3p	ATP6V1B2	ENSG00000147416
hsa-miR-130a-3p	CNTN4	ENSG00000144619
hsa-miR-130a-3p	ABCC5	ENSG00000114770
hsa-miR-130a-3p	SFMBT1	ENSG00000163935
hsa-miR-130a-3p	LRCH2	ENSG00000130224
hsa-miR-130a-3p	SKP1	ENSG00000113558
hsa-miR-130a-3p	PPP6R3	ENSG00000110075
hsa-miR-130a-3p	WHSC1	ENSG00000109685
hsa-miR-130a-3p	WHSC1	ENSG00000109685
hsa-miR-130a-3p	WHSC1	ENSG00000109685
hsa-miR-130a-3p	NDST1	ENSG00000070614
hsa-miR-130a-3p	B4GALT5	ENSG00000158470
hsa-miR-130a-3p	WHSC1	ENSG00000109685
hsa-miR-130a-3p	CAND1	ENSG00000111530
hsa-miR-130a-3p	ITPK1	ENSG00000100605
hsa-miR-130a-3p	WHSC1	ENSG00000109685
hsa-miR-130a-3p	RAB30	ENSG00000137502
hsa-miR-130a-3p	WHSC1	ENSG00000109685
hsa-miR-130a-3p	HBP1	ENSG00000105856
hsa-miR-130a-3p	FAM45A	ENSG00000119979
hsa-miR-130a-3p	PFKFB3	ENSG00000170525
hsa-miR-130a-3p	ATP2A2	ENSG00000174437
hsa-miR-130a-3p	MBNL1	ENSG00000152601
hsa-miR-130a-3p	MBNL1	ENSG00000152601
hsa-miR-130a-3p	ATG16L1	ENSG00000085978
hsa-miR-130a-3p	MBNL1	ENSG00000152601
hsa-miR-130a-3p	PBXIP1	ENSG00000163346
hsa-miR-130a-3p	CNTN4	ENSG00000144619
hsa-miR-130a-3p	MBNL1	ENSG00000152601
hsa-miR-130a-3p	CHD7	ENSG00000171316
hsa-miR-130a-3p	MAT2B	ENSG00000038274
hsa-miR-130a-3p	SYBU	ENSG00000147642
hsa-miR-130a-3p	MBNL1	ENSG00000152601
hsa-miR-130a-3p	MBNL1	ENSG00000152601
hsa-miR-130a-3p	WHSC1L1	ENSG00000147548
hsa-miR-130a-3p	ABCB7	ENSG00000131269
hsa-miR-130a-3p	STIM2	ENSG00000109689
hsa-miR-130a-3p	GDA	ENSG00000119125
hsa-miR-130a-3p	FLOT2	ENSG00000132589
hsa-miR-130a-3p	LCLAT1	ENSG00000172954
hsa-miR-130a-3p	SRSF11	ENSG00000116754
hsa-miR-130a-3p	EXOC5	ENSG00000070367
hsa-miR-130a-3p	POU4F2	ENSG00000151615
hsa-miR-130a-3p	TNRC6A	ENSG00000090905
hsa-miR-130a-3p	JPH3	ENSG00000154118
hsa-miR-130a-3p	RNF38	ENSG00000137075
hsa-miR-130a-3p	MPHOSPH9	ENSG00000051825
hsa-miR-130a-3p	SLC25A3	ENSG00000075415
hsa-miR-130a-3p	MUM1L1	ENSG00000157502
hsa-miR-130a-3p	BTBD11	ENSG00000151136
hsa-miR-130a-3p	BPTF	ENSG00000171634
hsa-miR-130a-3p	PELI1	ENSG00000197329
hsa-miR-130a-3p	MECP2	ENSG00000169057
hsa-miR-130a-3p	TMEM50B	ENSG00000142188
hsa-miR-130a-3p	ACSL4	ENSG00000068366
hsa-miR-130a-3p	STRADB	ENSG00000082146
hsa-miR-130a-3p	MIER3	ENSG00000155545
hsa-miR-130a-3p	RORB	ENSG00000198963
hsa-miR-130a-3p	CMPK1	ENSG00000162368
hsa-miR-130a-3p	KIAA1468	ENSG00000134444
hsa-miR-130a-3p	ZFYVE9	ENSG00000157077
hsa-miR-130a-3p	LNPEP	ENSG00000113441
hsa-miR-130a-3p	NPTN	ENSG00000156642
hsa-miR-130a-3p	PAFAH1B1	ENSG00000007168
hsa-miR-130a-3p	AKAP7	ENSG00000118507
hsa-miR-130a-3p	PRKAG2	ENSG00000106617
hsa-miR-130a-3p	STARD13	ENSG00000133121
hsa-miR-130a-3p	TMEM9B	ENSG00000175348
hsa-miR-130a-3p	NAA50	ENSG00000121579
hsa-miR-130a-3p	SLC2A1	ENSG00000117394
hsa-miR-130a-3p	ATG16L1	ENSG00000085978
hsa-miR-130a-3p	VPS37A	ENSG00000155975
hsa-miR-130a-3p	FOXF2	ENSG00000137273
hsa-miR-130a-3p	SOX5	ENSG00000134532
hsa-miR-130a-3p	ADCY2	ENSG00000078295
hsa-miR-130a-3p	ARFGEF1	ENSG00000066777
hsa-miR-130a-3p	NDEL1	ENSG00000166579
hsa-miR-130a-3p	CLTC	ENSG00000141367
hsa-miR-130a-3p	STARD13	ENSG00000133121
hsa-miR-130a-3p	STARD13	ENSG00000133121
hsa-miR-130a-3p	PITPNM2	ENSG00000090975
hsa-miR-130a-3p	HECA	ENSG00000112406
hsa-miR-130a-3p	RXFP2	ENSG00000133105
hsa-miR-130a-3p	DMXL1	ENSG00000172869
hsa-miR-130a-3p	NOG	ENSG00000183691
hsa-miR-130a-3p	CPD	ENSG00000108582
hsa-miR-130a-3p	MARCH2	ENSG00000099785
hsa-miR-130a-3p	ZNF282	ENSG00000170265
hsa-miR-130a-3p	YWHAB	ENSG00000166913
hsa-miR-130a-3p	ABCA1	ENSG00000165029
hsa-miR-130a-3p	KDM2A	ENSG00000173120
hsa-miR-130a-3p	SHANK2	ENSG00000162105
hsa-miR-130a-3p	MYT1	ENSG00000196132
hsa-miR-130a-3p	KLHL20	ENSG00000076321
hsa-miR-130a-3p	C6orf62	ENSG00000112308
hsa-miR-130a-3p	CSF1	ENSG00000184371
hsa-miR-130a-3p	MPPED2	ENSG00000066382
hsa-miR-130a-3p	SYT1	ENSG00000067715
hsa-miR-130a-3p	EREG	ENSG00000124882
hsa-miR-130a-3p	ZCCHC2	ENSG00000141664
hsa-miR-130a-3p	MAP3K12	ENSG00000139625
hsa-miR-130a-3p	ESRRG	ENSG00000196482
hsa-miR-130a-3p	UBE2W	ENSG00000104343
hsa-miR-130a-3p	UBE2W	ENSG00000104343
hsa-miR-130a-3p	OSBPL11	ENSG00000144909
hsa-miR-130a-3p	ITGA11	ENSG00000137809
hsa-miR-130a-3p	CHD9	ENSG00000177200
hsa-miR-130a-3p	FBXO11	ENSG00000138081
hsa-miR-130a-3p	CUL3	ENSG00000036257
hsa-miR-130a-3p	RMND5A	ENSG00000153561
hsa-miR-130a-3p	LCLAT1	ENSG00000172954
hsa-miR-130a-3p	PLAA	ENSG00000137055
hsa-miR-130a-3p	USP33	ENSG00000077254
hsa-miR-130a-3p	NOCT	ENSG00000151014
hsa-miR-130a-3p	NRP2	ENSG00000118257
hsa-miR-130a-3p	LIMD2	ENSG00000136490
hsa-miR-130a-3p	LIN28A	ENSG00000131914
hsa-miR-130a-3p	ELF5	ENSG00000135374
hsa-miR-130a-3p	WNT1	ENSG00000125084
hsa-miR-130a-3p	WNT2B	ENSG00000134245
hsa-miR-130a-3p	MMD	ENSG00000108960
hsa-miR-130a-3p	PUF60	ENSG00000179950
hsa-miR-130a-3p	MFSD6	ENSG00000151690
hsa-miR-130a-3p	HABP4	ENSG00000130956
hsa-miR-130a-3p	NRBF2	ENSG00000148572
hsa-miR-130a-3p	DOCK3	ENSG00000088538
hsa-miR-130a-3p	ZBTB4	ENSG00000174282
hsa-miR-130a-3p	HAS3	ENSG00000103044
hsa-miR-130a-3p	E2F7	ENSG00000165891
hsa-miR-130a-3p	WDR1	ENSG00000071127
hsa-miR-130a-3p	SPOPL	ENSG00000144228
hsa-miR-130a-3p	DNM2	ENSG00000079805
hsa-miR-130a-3p	WDR20	ENSG00000140153
hsa-miR-130a-3p	VPS37B	ENSG00000139722
hsa-miR-130a-3p	NPEPL1	ENSG00000215440
hsa-miR-130a-3p	BCL11A	ENSG00000119866
hsa-miR-130a-3p	SKIDA1	ENSG00000180592
hsa-miR-130a-3p	STX3	ENSG00000166900
hsa-miR-130a-3p	DLL1	ENSG00000198719
hsa-miR-130a-3p	PIK3IP1	ENSG00000100100
hsa-miR-130a-3p	PDIA3	ENSG00000167004
hsa-miR-130a-3p	BMT2	ENSG00000164603
hsa-miR-130a-3p	LCORL	ENSG00000178177
hsa-miR-130a-3p	RNF217	ENSG00000146373
hsa-miR-130a-3p	SNAP25	ENSG00000132639
hsa-miR-130a-3p	TTYH3	ENSG00000136295
hsa-miR-130a-3p	MIGA2	ENSG00000148343
hsa-miR-185-5p	DLEC1	ENSG00000008226
hsa-miR-185-5p	DCTN3	ENSG00000137100
hsa-miR-185-5p	HOMER2	ENSG00000103942
hsa-miR-185-5p	HOMER2	ENSG00000103942
hsa-miR-185-5p	LRRC15	ENSG00000172061
hsa-miR-185-5p	PBX1	ENSG00000185630
hsa-miR-185-5p	PCDHA13	ENSG00000239389
hsa-miR-185-5p	PCDHA2	ENSG00000204969
hsa-miR-185-5p	PCDHA11	ENSG00000249158
hsa-miR-185-5p	SGMS1	ENSG00000198964
hsa-miR-185-5p	PCDHA12	ENSG00000251664
hsa-miR-185-5p	PCDHA1	ENSG00000204970
hsa-miR-185-5p	PCDHA10	ENSG00000250120
hsa-miR-185-5p	ALKBH8	ENSG00000137760
hsa-miR-185-5p	CORO2B	ENSG00000103647
hsa-miR-185-5p	DNAJB2	ENSG00000135924
hsa-miR-185-5p	PCDHA5	ENSG00000204965
hsa-miR-185-5p	PCDHA6	ENSG00000081842
hsa-miR-185-5p	ASTN2	ENSG00000148219
hsa-miR-185-5p	PCDHA3	ENSG00000255408
hsa-miR-185-5p	PCDHA4	ENSG00000204967
hsa-miR-185-5p	CARMIL3	ENSG00000186648
hsa-miR-185-5p	DYNLL2	ENSG00000264364
hsa-miR-185-5p	NFATC3	ENSG00000072736
hsa-miR-185-5p	NFATC3	ENSG00000072736
hsa-miR-185-5p	PCDHA7	ENSG00000204963
hsa-miR-185-5p	PCDHA8	ENSG00000204962
hsa-miR-185-5p	PTPRE	ENSG00000132334
hsa-miR-185-5p	SSBP2	ENSG00000145687
hsa-miR-185-5p	COPS4	ENSG00000138663
hsa-miR-185-5p	PCDHA10	ENSG00000250120
hsa-miR-185-5p	ATP6V1F	ENSG00000128524
hsa-miR-185-5p	LRRC9	ENSG00000131951
hsa-miR-185-5p	CPEB2	ENSG00000137449
hsa-miR-185-5p	SMG7	ENSG00000116698
hsa-miR-185-5p	SEL1L3	ENSG00000091490
hsa-miR-185-5p	ADGRL1	ENSG00000072071
hsa-miR-185-5p	TJP1	ENSG00000104067
hsa-miR-185-5p	PCDH9	ENSG00000184226
hsa-miR-185-5p	PCDHA9	ENSG00000204961
hsa-miR-185-5p	ABHD17B	ENSG00000107362
hsa-miR-185-5p	KLK5	ENSG00000167754
hsa-miR-185-5p	SLC30A3	ENSG00000115194
hsa-miR-185-5p	DLEC1	ENSG00000008226
hsa-miR-185-5p	DLEC1	ENSG00000008226
hsa-miR-185-5p	HCN4	ENSG00000138622
hsa-miR-185-5p	CA10	ENSG00000154975
hsa-miR-185-5p	TCF12	ENSG00000140262
hsa-miR-185-5p	DTNA	ENSG00000134769
hsa-miR-185-5p	ST7L	ENSG00000007341
hsa-miR-185-5p	TEAD1	ENSG00000187079
hsa-miR-185-5p	ACVR2A	ENSG00000121989
hsa-miR-185-5p	ST7L	ENSG00000007341
hsa-miR-185-5p	BRD9	ENSG00000028310
hsa-miR-185-5p	TMED5	ENSG00000117500
hsa-miR-185-5p	PCDH9	ENSG00000184226
hsa-miR-185-5p	APP	ENSG00000142192
hsa-miR-185-5p	PCDHAC2	ENSG00000243232
hsa-miR-185-5p	APP	ENSG00000142192
hsa-miR-185-5p	KCNN3	ENSG00000143603
hsa-miR-185-5p	PCDHAC1	ENSG00000248383
hsa-miR-185-5p	FOXN3	ENSG00000053254
hsa-miR-185-5p	NFASC	ENSG00000163531
hsa-miR-185-5p	GOLGA7	ENSG00000147533
hsa-miR-185-5p	CLDN15	ENSG00000106404
hsa-miR-185-5p	HMGA2	ENSG00000149948
hsa-miR-185-5p	PAK6	ENSG00000137843
hsa-miR-185-5p	SMG7	ENSG00000116698
hsa-miR-185-5p	EMC10	ENSG00000161671
hsa-miR-185-5p	SMG7	ENSG00000116698
hsa-miR-185-5p	BRCA1	ENSG00000012048
hsa-miR-185-5p	AGO1	ENSG00000092847
hsa-miR-185-5p	CDC42	ENSG00000070831
hsa-miR-185-5p	C2CD2L	ENSG00000172375
hsa-miR-185-5p	MESDC1	ENSG00000140406
hsa-miR-185-5p	ANKFY1	ENSG00000185722
hsa-miR-185-5p	NEUROD2	ENSG00000171532
hsa-miR-185-5p	SLC9A9	ENSG00000181804
hsa-miR-185-5p	LPCAT3	ENSG00000111684
hsa-miR-185-5p	SEMA6D	ENSG00000137872
hsa-miR-185-5p	CSNK1D	ENSG00000141551
hsa-miR-185-5p	ABCA9	ENSG00000154258
hsa-miR-185-5p	EMC10	ENSG00000161671
hsa-miR-185-5p	SYNM	ENSG00000182253
hsa-miR-185-5p	APC2	ENSG00000115266
hsa-miR-185-5p	RAE1	ENSG00000101146
hsa-miR-185-5p	SMG7	ENSG00000116698
hsa-miR-185-5p	CPEB4	ENSG00000113742
hsa-miR-185-5p	SYNM	ENSG00000182253
hsa-miR-185-5p	SPATA2	ENSG00000158480
hsa-miR-185-5p	GATAD2B	ENSG00000143614
hsa-miR-185-5p	ABCB9	ENSG00000150967
hsa-miR-185-5p	CPNE6	ENSG00000100884
hsa-miR-185-5p	CPEB2	ENSG00000137449
hsa-miR-185-5p	ST7L	ENSG00000007341
hsa-miR-185-5p	ST7L	ENSG00000007341
hsa-miR-185-5p	IGF2R	ENSG00000197081
hsa-miR-185-5p	PRKCH	ENSG00000027075
hsa-miR-185-5p	FAM135B	ENSG00000147724
hsa-miR-185-5p	PROSER3	ENSG00000167595
hsa-miR-185-5p	TJP1	ENSG00000104067
hsa-miR-185-5p	ARID1A	ENSG00000117713
hsa-miR-185-5p	ARID1A	ENSG00000117713
hsa-miR-185-5p	BRE	ENSG00000158019
hsa-miR-185-5p	BRE	ENSG00000158019
hsa-miR-185-5p	FAM63B	ENSG00000128923
hsa-miR-185-5p	MORN4	ENSG00000171160
hsa-miR-185-5p	CLVS1	ENSG00000177182
hsa-miR-185-5p	MAT2A	ENSG00000168906
hsa-miR-185-5p	HIC2	ENSG00000169635
hsa-miR-185-5p	LUZP1	ENSG00000169641
hsa-miR-185-5p	PRKAR2A	ENSG00000114302
hsa-miR-185-5p	ATP2A2	ENSG00000174437
hsa-miR-185-5p	SOX13	ENSG00000143842
hsa-miR-185-5p	FAM134C	ENSG00000141699
hsa-miR-185-5p	PTPRE	ENSG00000132334
hsa-miR-185-5p	EPHB2	ENSG00000133216
hsa-miR-185-5p	ASTN2	ENSG00000148219
hsa-miR-185-5p	IKZF4	ENSG00000123411
hsa-miR-185-5p	ANXA2	ENSG00000182718
hsa-miR-185-5p	RANBP10	ENSG00000141084
hsa-miR-185-5p	KIF1B	ENSG00000054523
hsa-miR-185-5p	MLLT11	ENSG00000213190
hsa-miR-185-5p	RHOA	ENSG00000067560
hsa-miR-185-5p	MAPK14	ENSG00000112062
hsa-miR-185-5p	TSHZ3	ENSG00000121297
hsa-miR-185-5p	PTMS	ENSG00000159335
hsa-miR-185-5p	PRX	ENSG00000105227
hsa-miR-185-5p	MAPK14	ENSG00000112062
hsa-miR-185-5p	DTNA	ENSG00000134769
hsa-miR-185-5p	SLC16A2	ENSG00000147100
hsa-miR-185-5p	CPT1B	ENSG00000205560
hsa-miR-185-5p	RAB14	ENSG00000119396
hsa-miR-185-5p	PHYHIP	ENSG00000168490
hsa-miR-185-5p	ARCN1	ENSG00000095139
hsa-miR-185-5p	NR1D1	ENSG00000126368
hsa-miR-185-5p	NPAS4	ENSG00000174576
hsa-miR-185-5p	ASTN2	ENSG00000148219
hsa-miR-185-5p	NTRK3	ENSG00000140538
hsa-miR-185-5p	GOLGA7	ENSG00000147533
hsa-miR-185-5p	DTNA	ENSG00000134769
hsa-miR-185-5p	CHKB	ENSG00000100288
hsa-miR-185-5p	ARID1A	ENSG00000117713
hsa-miR-185-5p	KDM2A	ENSG00000173120
hsa-miR-185-5p	CGN	ENSG00000143375
hsa-miR-185-5p	PPP4R3A	ENSG00000100796
hsa-miR-185-5p	ST7L	ENSG00000007341
hsa-miR-185-5p	MSI1	ENSG00000135097
hsa-miR-185-5p	EPHB2	ENSG00000133216
hsa-miR-185-5p	ASB15	ENSG00000146809
hsa-miR-185-5p	TCF12	ENSG00000140262
hsa-miR-185-5p	HOXB5	ENSG00000120075
hsa-miR-185-5p	DTX3	ENSG00000178498
hsa-miR-185-5p	RNF26	ENSG00000173456
hsa-miR-185-5p	PCDH10	ENSG00000138650
hsa-miR-185-5p	PCDHA6	ENSG00000081842
hsa-miR-185-5p	ORC5	ENSG00000164815
hsa-miR-185-5p	CAMK2D	ENSG00000145349
hsa-miR-185-5p	CAMK2D	ENSG00000145349
hsa-miR-185-5p	IP6K1	ENSG00000176095
hsa-miR-185-5p	FAM175B	ENSG00000165660
hsa-miR-185-5p	EVA1A	ENSG00000115363
hsa-miR-185-5p	CNIH2	ENSG00000174871
hsa-miR-185-5p	EDN1	ENSG00000078401
hsa-miR-185-5p	PCDHA1	ENSG00000204970
hsa-miR-185-5p	NFATC3	ENSG00000072736
hsa-miR-185-5p	CADM4	ENSG00000105767
hsa-miR-185-5p	LRRC7	ENSG00000033122
hsa-miR-185-5p	GAP43	ENSG00000172020
hsa-miR-185-5p	PATZ1	ENSG00000100105
hsa-miR-185-5p	MIEF1	ENSG00000100335
hsa-miR-185-5p	FURIN	ENSG00000140564
hsa-miR-185-5p	ANXA2	ENSG00000182718
hsa-miR-185-5p	ANXA2	ENSG00000182718
hsa-miR-185-5p	ZNF385A	ENSG00000161642
hsa-miR-185-5p	PITPNC1	ENSG00000154217
hsa-miR-185-5p	MAPK14	ENSG00000112062
hsa-miR-185-5p	APP	ENSG00000142192
hsa-miR-185-5p	TCF12	ENSG00000140262
hsa-miR-185-5p	KCNN3	ENSG00000143603
hsa-miR-185-5p	TCF12	ENSG00000140262
hsa-miR-185-5p	TCF12	ENSG00000140262
hsa-miR-185-5p	RIC8B	ENSG00000111785
hsa-miR-185-5p	MED13L	ENSG00000123066
hsa-miR-185-5p	SLC37A2	ENSG00000134955
hsa-miR-185-5p	AKAP6	ENSG00000151320
hsa-miR-185-5p	ZNF3	ENSG00000166526
hsa-miR-185-5p	DAB2IP	ENSG00000136848
hsa-miR-185-5p	CSNK1D	ENSG00000141551
hsa-miR-185-5p	FAM53B	ENSG00000189319
hsa-miR-193a-5p
hsa-miR-193a-5p
