# Supplementary material for: Identification of Differentially Expressed miRNAs in Porcine Adipose Tissues and Evaluation of Their Effects on Feed Efficiency
Source: Genes (Basel). 2022 Dec 19;13(12):2406. doi: 10.3390/genes13122406 (PMC9778086; doi:10.3390/genes13122406)
Supplement: Supplementary file 1 [file genes-13-02406-s001.zip › Table S4 GO analysis for genes targeted by DE miRNAs between adipose tissues from high and low FE Yorkshire pigs.xls]

## Sheet: Sheet1
Title
Identification of differentially expressed miRNAs in porcine adipose tissues and evaluation of their effects on feed efficiency
Authors
Mingxing Liao, Zhuqing Ren*, Yuanxin miao *
* the corresponding author
Table S4 GO analysis for genes targeted by DE miRNAs between adipose tissues from high and low FE Yorkshire pigs
Category	Term	Genes Count	GeneRatio	P-Value	Benjamini
GOTERM_BP_DIRECT	positive regulation of transcription from RNA polymerase II promoter	509	9	5.6e-32	5e-28
GOTERM_BP_DIRECT	negative regulation of transcription from RNA polymerase II promoter	426	7.5	4.7e-31	2.1e-27
GOTERM_BP_DIRECT	positive regulation of transcription, DNA-templated	330	5.8	2.7e-28	8e-25
GOTERM_BP_DIRECT	cell division	189	3.3	1.1e-20	2.5e-17
GOTERM_BP_DIRECT	negative regulation of transcription, DNA-templated	261	4.6	1.4e-19	2.5e-16
GOTERM_BP_DIRECT	cellular response to DNA damage stimulus	145	2.6	5e-19	7.5e-16
GOTERM_BP_DIRECT	regulation of transcription from RNA polymerase II promoter	620	11	1.1e-17	1.4e-14
GOTERM_BP_DIRECT	regulation of transcription, DNA-templated	381	6.7	8e-16	8.3e-13
GOTERM_BP_DIRECT	cell cycle	169	3	8.4e-16	8.3e-13
GOTERM_BP_DIRECT	protein phosphorylation	217	3.8	5.2e-15	4.6e-12
GOTERM_BP_DIRECT	chromatin organization	128	2.3	6.2e-15	5e-12
GOTERM_BP_DIRECT	chromatin remodeling	96	1.7	1e-14	7.6e-12
GOTERM_BP_DIRECT	regulation of cell cycle	148	2.6	9.9e-14	6.8e-11
GOTERM_BP_DIRECT	protein polyubiquitination	92	1.6	1.1e-12	6.7e-10
GOTERM_BP_DIRECT	DNA repair	136	2.4	3.3e-12	1.9e-09
GOTERM_BP_DIRECT	cell migration	125	2.2	1.3e-11	7.3e-09
GOTERM_BP_DIRECT	cellular response to UV	42	0.7	1.5e-11	7.7e-09
GOTERM_BP_DIRECT	proteasome-mediated ubiquitin-dependent protein catabolic process	103	1.8	2.6e-11	1.3e-08
GOTERM_BP_DIRECT	negative regulation of apoptotic process	212	3.7	4.7e-11	2.2e-08
GOTERM_BP_DIRECT	G1/S transition of mitotic cell cycle	48	0.8	6.4e-11	2.9e-08
GOTERM_BP_DIRECT	negative regulation of cell proliferation	189	3.3	7e-11	3e-08
GOTERM_BP_DIRECT	ubiquitin-dependent protein catabolic process	127	2.2	1.6e-10	6.4e-08
GOTERM_BP_DIRECT	positive regulation of apoptotic process	143	2.5	1.7e-10	6.7e-08
GOTERM_BP_DIRECT	positive regulation of pri-miRNA transcription from RNA polymerase II promoter	35	0.6	3.6e-10	1.3e-07
GOTERM_BP_DIRECT	apoptotic process	234	4.1	6.5e-10	2.3e-07
GOTERM_BP_DIRECT	intracellular protein transport	141	2.5	7.5e-10	2.6e-07
GOTERM_BP_DIRECT	positive regulation of translation	50	0.9	1e-09	3.4e-07
GOTERM_BP_DIRECT	protein stabilization	102	1.8	1.7e-09	5.4e-07
GOTERM_BP_DIRECT	in utero embryonic development	98	1.7	6e-09	1.8e-06
GOTERM_BP_DIRECT	peptidyl-serine phosphorylation	86	1.5	8.7e-09	2.6e-06
GOTERM_BP_DIRECT	mitotic cell cycle	76	1.3	9.2e-09	2.6e-06
GOTERM_BP_DIRECT	response to drug	125	2.2	1.3e-08	3.5e-06
GOTERM_BP_DIRECT	protein import into nucleus	56	1	1.5e-08	4.1e-06
GOTERM_BP_DIRECT	actin cytoskeleton organization	85	1.5	2.9e-08	7.5e-06
GOTERM_BP_DIRECT	protein ubiquitination	191	3.4	2.9e-08	7.5e-06
GOTERM_BP_DIRECT	protein transport	172	3	3.8e-08	9.4e-06
GOTERM_BP_DIRECT	angiogenesis	109	1.9	4.9e-08	1.2e-05
GOTERM_BP_DIRECT	negative regulation of translation	47	0.8	5e-08	1.2e-05
GOTERM_BP_DIRECT	peptidyl-threonine phosphorylation	42	0.7	5.6e-08	1.3e-05
GOTERM_BP_DIRECT	osteoblast differentiation	63	1.1	7.3e-08	1.6e-05
GOTERM_BP_DIRECT	mitotic cytokinesis	40	0.7	8.8e-08	1.9e-05
GOTERM_BP_DIRECT	rhythmic process	44	0.8	1e-07	2.2e-05
GOTERM_BP_DIRECT	DNA replication	61	1.1	1.2e-07	2.5e-05
GOTERM_BP_DIRECT	cellular response to epidermal growth factor stimulus	31	0.5	1.6e-07	3.2e-05
GOTERM_BP_DIRECT	cellular response to glucose starvation	34	0.6	1.7e-07	3.4e-05
GOTERM_BP_DIRECT	transcription from RNA polymerase II promoter	103	1.8	1.9e-07	3.6e-05
GOTERM_BP_DIRECT	response to xenobiotic stimulus	103	1.8	2.4e-07	4.5e-05
GOTERM_BP_DIRECT	cellular response to ionizing radiation	28	0.5	2.6e-07	4.8e-05
GOTERM_BP_DIRECT	regulation of mRNA stability	26	0.5	3.4e-07	6.2e-05
GOTERM_BP_DIRECT	mRNA splicing, via spliceosome	89	1.6	3.5e-07	6.2e-05
GOTERM_BP_DIRECT	positive regulation of protein catabolic process	48	0.8	4e-07	6.8e-05
GOTERM_BP_DIRECT	wound healing	53	0.9	4e-07	6.8e-05
GOTERM_BP_DIRECT	intracellular signal transduction	171	3	4.5e-07	7.5e-05
GOTERM_BP_DIRECT	regulation of circadian rhythm	38	0.7	6.9e-07	0.00011
GOTERM_BP_DIRECT	chromosome segregation	42	0.7	7e-07	0.00011
GOTERM_BP_DIRECT	mRNA processing	94	1.7	8.4e-07	0.00013
GOTERM_BP_DIRECT	protein K48-linked ubiquitination	37	0.7	8.7e-07	0.00014
GOTERM_BP_DIRECT	protein localization	68	1.2	9e-07	0.00014
GOTERM_BP_DIRECT	cell proliferation	82	1.4	1e-06	0.00015
GOTERM_BP_DIRECT	macromolecular complex assembly	70	1.2	1e-06	0.00015
GOTERM_BP_DIRECT	protein dephosphorylation	71	1.3	1.1e-06	0.00016
GOTERM_BP_DIRECT	multicellular organism growth	47	0.8	1.2e-06	0.00017
GOTERM_BP_DIRECT	RNA splicing	86	1.5	1.9e-06	0.00027
GOTERM_BP_DIRECT	cellular response to leukemia inhibitory factor	51	0.9	2e-06	0.00028
GOTERM_BP_DIRECT	response to endoplasmic reticulum stress	44	0.8	2.4e-06	0.00034
GOTERM_BP_DIRECT	liver development	47	0.8	2.6e-06	0.00035
GOTERM_BP_DIRECT	glycogen metabolic process	22	0.4	2.8e-06	0.00038
GOTERM_BP_DIRECT	transforming growth factor beta receptor signaling pathway	50	0.9	3.7e-06	0.00048
GOTERM_BP_DIRECT	regulation of protein stability	47	0.8	3.8e-06	0.00048
GOTERM_BP_DIRECT	response to UV	28	0.5	3.8e-06	0.00048
GOTERM_BP_DIRECT	regulation of catalytic activity	143	2.5	3.9e-06	0.00049
GOTERM_BP_DIRECT	regulation of RNA splicing	41	0.7	5.1e-06	0.00064
GOTERM_BP_DIRECT	double-strand break repair	39	0.7	5.5e-06	0.00068
GOTERM_BP_DIRECT	translational initiation	31	0.5	5.9e-06	0.00071
GOTERM_BP_DIRECT	negative regulation of transforming growth factor beta receptor signaling pathway	48	0.8	6.1e-06	0.00072
GOTERM_BP_DIRECT	mRNA transport	45	0.8	6.2e-06	0.00072
GOTERM_BP_DIRECT	MAPK cascade	59	1	7.7e-06	0.00089
GOTERM_BP_DIRECT	cellular response to insulin stimulus	52	0.9	8.8e-06	0.001
GOTERM_BP_DIRECT	positive regulation of I-kappaB kinase/NF-kappaB signaling	81	1.4	9.1e-06	0.001
GOTERM_BP_DIRECT	positive regulation of epithelial to mesenchymal transition	29	0.5	9.4e-06	0.001
GOTERM_BP_DIRECT	somatic stem cell population maintenance	31	0.5	9.8e-06	0.0011
GOTERM_BP_DIRECT	response to X-ray	16	0.3	1.1e-05	0.0012
GOTERM_BP_DIRECT	DNA duplex unwinding	39	0.7	1.3e-05	0.0014
GOTERM_BP_DIRECT	positive regulation of peptidyl-serine phosphorylation	45	0.8	1.3e-05	0.0014
GOTERM_BP_DIRECT	ER to Golgi vesicle-mediated transport	59	1	1.4e-05	0.0014
GOTERM_BP_DIRECT	positive regulation of smooth muscle cell proliferation	37	0.7	1.4e-05	0.0014
GOTERM_BP_DIRECT	positive regulation of protein ubiquitination	40	0.7	1.5e-05	0.0015
GOTERM_BP_DIRECT	positive regulation of protein phosphorylation	86	1.5	1.5e-05	0.0015
GOTERM_BP_DIRECT	regulation of macroautophagy	31	0.5	1.6e-05	0.0016
GOTERM_BP_DIRECT	positive regulation of gene expression	183	3.2	1.8e-05	0.0017
GOTERM_BP_DIRECT	cerebral cortex development	39	0.7	1.9e-05	0.0018
GOTERM_BP_DIRECT	mitotic G2 DNA damage checkpoint	23	0.4	2e-05	0.0019
GOTERM_BP_DIRECT	protein autophosphorylation	76	1.3	2.2e-05	0.0021
GOTERM_BP_DIRECT	regulation of transforming growth factor beta receptor signaling pathway	18	0.3	2.4e-05	0.0023
GOTERM_BP_DIRECT	response to cytokine	29	0.5	2.6e-05	0.0024
GOTERM_BP_DIRECT	positive regulation of glial cell proliferation	17	0.3	2.7e-05	0.0025
GOTERM_BP_DIRECT	cellular response to amino acid stimulus	32	0.6	3.1e-05	0.0029
GOTERM_BP_DIRECT	DNA damage response, signal transduction by p53 class mediator	14	0.2	3.2e-05	0.0029
GOTERM_BP_DIRECT	cellular senescence	30	0.5	3.3e-05	0.0029
GOTERM_BP_DIRECT	nucleocytoplasmic transport	29	0.5	4.2e-05	0.0037
GOTERM_BP_DIRECT	transcription, DNA-templated	50	0.9	4.9e-05	0.0043
GOTERM_BP_DIRECT	Golgi organization	58	1	5.1e-05	0.0044
GOTERM_BP_DIRECT	stem cell population maintenance	30	0.5	5.1e-05	0.0044
GOTERM_BP_DIRECT	cellular response to organic cyclic compound	30	0.5	5.1e-05	0.0044
GOTERM_BP_DIRECT	response to unfolded protein	30	0.5	5.1e-05	0.0044
GOTERM_BP_DIRECT	cellular response to mechanical stimulus	42	0.7	5.3e-05	0.0044
GOTERM_BP_DIRECT	positive regulation of stem cell population maintenance	26	0.5	5.4e-05	0.0045
GOTERM_BP_DIRECT	viral entry into host cell	47	0.8	5.5e-05	0.0045
GOTERM_BP_DIRECT	regulation of alternative mRNA splicing, via spliceosome	33	0.6	5.6e-05	0.0045
GOTERM_BP_DIRECT	positive regulation of neuron apoptotic process	33	0.6	5.6e-05	0.0045
GOTERM_BP_DIRECT	ventricular septum development	21	0.4	5.6e-05	0.0045
GOTERM_BP_DIRECT	regulation of apoptotic process	94	1.7	5.7e-05	0.0045
GOTERM_BP_DIRECT	circadian regulation of gene expression	36	0.6	5.7e-05	0.0045
GOTERM_BP_DIRECT	regulation of cell size	17	0.3	6.1e-05	0.0047
GOTERM_BP_DIRECT	stress granule assembly	17	0.3	6.1e-05	0.0047
GOTERM_BP_DIRECT	substrate adhesion-dependent cell spreading	31	0.5	6.1e-05	0.0047
GOTERM_BP_DIRECT	positive regulation of cell migration	99	1.7	6.3e-05	0.0048
GOTERM_BP_DIRECT	regulation of cyclin-dependent protein serine/threonine kinase activity	29	0.5	6.6e-05	0.005
GOTERM_BP_DIRECT	nuclear envelope organization	16	0.3	7e-05	0.0052
GOTERM_BP_DIRECT	regulation of telomere maintenance	16	0.3	7e-05	0.0052
GOTERM_BP_DIRECT	activation of protein kinase activity	38	0.7	7.2e-05	0.0052
GOTERM_BP_DIRECT	positive regulation of protein binding	38	0.7	7.2e-05	0.0052
GOTERM_BP_DIRECT	rRNA processing	57	1	8.3e-05	0.006
GOTERM_BP_DIRECT	brain development	103	1.8	8.4e-05	0.006
GOTERM_BP_DIRECT	epithelial to mesenchymal transition	26	0.5	8.7e-05	0.0062
GOTERM_BP_DIRECT	mitotic chromosome condensation	14	0.2	8.8e-05	0.0062
GOTERM_BP_DIRECT	negative regulation of gene expression	115	2	9e-05	0.0063
GOTERM_BP_DIRECT	production of miRNAs involved in gene silencing by miRNA	13	0.2	9.2e-05	0.0064
GOTERM_BP_DIRECT	DNA damage checkpoint	21	0.4	0.0001	0.0069
GOTERM_BP_DIRECT	establishment of mitotic spindle orientation	21	0.4	0.0001	0.0069
GOTERM_BP_DIRECT	positive regulation of telomere maintenance via telomerase	21	0.4	0.0001	0.0069
GOTERM_BP_DIRECT	positive regulation of protein serine/threonine kinase activity	32	0.6	0.00011	0.0072
GOTERM_BP_DIRECT	positive regulation of proteasomal ubiquitin-dependent protein catabolic process	39	0.7	0.00011	0.0074
GOTERM_BP_DIRECT	peptidyl-threonine dephosphorylation	17	0.3	0.00013	0.0084
GOTERM_BP_DIRECT	cell aging	17	0.3	0.00013	0.0084
GOTERM_BP_DIRECT	JNK cascade	31	0.5	0.00014	0.009
GOTERM_BP_DIRECT	cellular response to nerve growth factor stimulus	24	0.4	0.00014	0.0092
GOTERM_BP_DIRECT	negative regulation of canonical Wnt signaling pathway	61	1.1	0.00014	0.0092
GOTERM_BP_DIRECT	vesicle-mediated transport	90	1.6	0.00015	0.0094
GOTERM_BP_DIRECT	post-embryonic development	35	0.6	0.00015	0.0096
GOTERM_BP_DIRECT	heart development	85	1.5	0.00016	0.0099
GOTERM_BP_DIRECT	positive regulation of viral genome replication	19	0.3	0.00016	0.0099
GOTERM_BP_DIRECT	negative regulation of cellular senescence	19	0.3	0.00016	0.0099
GOTERM_BP_DIRECT	histone H3-K4 methylation	19	0.3	0.00016	0.0099
GOTERM_BP_DIRECT	positive regulation of protein kinase B signaling	55	1	0.00017	0.01
GOTERM_BP_DIRECT	RNA phosphodiester bond hydrolysis, exonucleolytic	21	0.4	0.00018	0.011
GOTERM_BP_DIRECT	hematopoietic stem cell differentiation	15	0.3	0.00018	0.011
GOTERM_BP_DIRECT	negative regulation of pri-miRNA transcription from RNA polymerase II promoter	15	0.3	0.00018	0.011
GOTERM_BP_DIRECT	regulation of G1/S transition of mitotic cell cycle	28	0.5	0.0002	0.012
GOTERM_BP_DIRECT	Golgi to plasma membrane protein transport	18	0.3	0.0002	0.012
GOTERM_BP_DIRECT	positive regulation of histone acetylation	18	0.3	0.0002	0.012
GOTERM_BP_DIRECT	I-kappaB kinase/NF-kappaB signaling	31	0.5	0.0002	0.012
GOTERM_BP_DIRECT	mitotic spindle organization	29	0.5	0.00023	0.013
GOTERM_BP_DIRECT	anterior/posterior pattern specification	43	0.8	0.00026	0.015
GOTERM_BP_DIRECT	pre-miRNA processing	12	0.2	0.00026	0.015
GOTERM_BP_DIRECT	negative regulation of DNA damage response, signal transduction by p53 class mediator	12	0.2	0.00026	0.015
GOTERM_BP_DIRECT	positive regulation of nuclear-transcribed mRNA catabolic process, deadenylation-dependent decay	12	0.2	0.00026	0.015
GOTERM_BP_DIRECT	dosage compensation by inactivation of X chromosome	11	0.2	0.00027	0.015
GOTERM_BP_DIRECT	positive regulation of nuclear-transcribed mRNA poly(A) tail shortening	11	0.2	0.00027	0.015
GOTERM_BP_DIRECT	histone acetylation	34	0.6	0.00027	0.015
GOTERM_BP_DIRECT	osteoclast differentiation	23	0.4	0.00029	0.016
GOTERM_BP_DIRECT	response to toxic substance	40	0.7	0.0003	0.016
GOTERM_BP_DIRECT	protein autoubiquitination	36	0.6	0.00032	0.017
GOTERM_BP_DIRECT	regulation of cell proliferation	66	1.2	0.00034	0.018
GOTERM_BP_DIRECT	cellular response to hypoxia	58	1	0.00034	0.018
GOTERM_BP_DIRECT	toxin transport	24	0.4	0.00036	0.019
GOTERM_BP_DIRECT	positive regulation of protein import into nucleus	24	0.4	0.00036	0.019
GOTERM_BP_DIRECT	positive regulation of G2/M transition of mitotic cell cycle	18	0.3	0.00036	0.019
GOTERM_BP_DIRECT	positive regulation of cell differentiation	30	0.5	0.00037	0.02
GOTERM_BP_DIRECT	endoplasmic reticulum unfolded protein response	27	0.5	0.00038	0.02
GOTERM_BP_DIRECT	stem cell proliferation	27	0.5	0.00038	0.02
GOTERM_BP_DIRECT	regulation of gene expression	95	1.7	0.00042	0.022
GOTERM_BP_DIRECT	negative regulation of protein ubiquitination	28	0.5	0.00043	0.022
GOTERM_BP_DIRECT	regulation of cytokinesis	23	0.4	0.00046	0.024
GOTERM_BP_DIRECT	cellular response to growth factor stimulus	29	0.5	0.00048	0.024
GOTERM_BP_DIRECT	nuclear-transcribed mRNA catabolic process, nonsense-mediated decay	21	0.4	0.00048	0.024
GOTERM_BP_DIRECT	intrinsic apoptotic signaling pathway in response to DNA damage by p53 class mediator	19	0.3	0.00049	0.024
GOTERM_BP_DIRECT	negative regulation of DNA binding	19	0.3	0.00049	0.024
GOTERM_BP_DIRECT	protein folding	66	1.2	0.0005	0.025
GOTERM_BP_DIRECT	negative regulation of cell growth	53	0.9	0.00052	0.026
GOTERM_BP_DIRECT	aging	75	1.3	0.00053	0.026
GOTERM_BP_DIRECT	response to ionizing radiation	24	0.4	0.00054	0.027
GOTERM_BP_DIRECT	positive regulation of autophagy	35	0.6	0.00055	0.027
GOTERM_BP_DIRECT	histone deacetylation	27	0.5	0.00055	0.027
GOTERM_BP_DIRECT	response to hypoxia	71	1.3	0.00056	0.027
GOTERM_BP_DIRECT	cellular protein localization	31	0.5	0.00057	0.027
GOTERM_BP_DIRECT	ubiquitin-dependent ERAD pathway	37	0.7	0.00061	0.028
GOTERM_BP_DIRECT	histone H3 acetylation	28	0.5	0.00061	0.028
GOTERM_BP_DIRECT	intracellular receptor signaling pathway	20	0.4	0.00062	0.028
GOTERM_BP_DIRECT	regulation of mitotic metaphase/anaphase transition	20	0.4	0.00062	0.028
GOTERM_BP_DIRECT	intrinsic apoptotic signaling pathway in response to endoplasmic reticulum stress	20	0.4	0.00062	0.028
GOTERM_BP_DIRECT	lamellipodium assembly	20	0.4	0.00062	0.028
GOTERM_BP_DIRECT	ATP-dependent chromatin remodeling	20	0.4	0.00062	0.028
GOTERM_BP_DIRECT	positive regulation of cytoplasmic translation	12	0.2	0.00062	0.028
GOTERM_BP_DIRECT	negative regulation of intrinsic apoptotic signaling pathway in response to DNA damage by p53 class mediator	12	0.2	0.00062	0.028
GOTERM_BP_DIRECT	histone phosphorylation	12	0.2	0.00062	0.028
GOTERM_BP_DIRECT	regulation of DNA repair	23	0.4	0.0007	0.032
GOTERM_BP_DIRECT	mammary gland epithelial cell differentiation	11	0.2	0.0007	0.032
GOTERM_BP_DIRECT	positive regulation of transcription from RNA polymerase I promoter	15	0.3	0.00071	0.032
GOTERM_BP_DIRECT	regulation of glycogen biosynthetic process	10	0.2	0.00076	0.034
GOTERM_BP_DIRECT	maternal placenta development	9	0.2	0.00077	0.034
GOTERM_BP_DIRECT	positive regulation of DNA binding	19	0.3	0.0008	0.035
GOTERM_BP_DIRECT	neural tube closure	37	0.7	0.0008	0.035
GOTERM_BP_DIRECT	regulation of transcription elongation from RNA polymerase II promoter	14	0.2	0.00088	0.039
GOTERM_BP_DIRECT	regulation of signal transduction by p53 class mediator	22	0.4	0.0009	0.039
GOTERM_BP_DIRECT	positive regulation of double-strand break repair	22	0.4	0.0009	0.039
GOTERM_BP_DIRECT	neuron apoptotic process	34	0.6	0.00093	0.04
GOTERM_BP_DIRECT	response to organic cyclic compound	29	0.5	0.00094	0.04
GOTERM_BP_DIRECT	positive regulation of canonical Wnt signaling pathway	46	0.8	0.00097	0.041
GOTERM_BP_DIRECT	positive regulation of osteoblast differentiation	35	0.6	0.00098	0.041
GOTERM_BP_DIRECT	response to mechanical stimulus	30	0.5	0.001	0.043
GOTERM_BP_DIRECT	positive regulation of protein targeting to mitochondrion	18	0.3	0.001	0.043
GOTERM_BP_DIRECT	positive regulation of SMAD protein import into nucleus	13	0.2	0.0011	0.046
GOTERM_BP_DIRECT	positive regulation of cell growth	40	0.7	0.0011	0.047
GOTERM_BP_DIRECT	positive regulation of myoblast differentiation	24	0.4	0.0012	0.049
GOTERM_BP_DIRECT	protein sumoylation	24	0.4	0.0012	0.049
GOTERM_BP_DIRECT	kidney development	49	0.9	0.0012	0.05
GOTERM_BP_DIRECT	Wnt signaling pathway	74	1.3	0.0012	0.051
GOTERM_BP_DIRECT	negative regulation of fibroblast proliferation	19	0.3	0.0013	0.052
GOTERM_BP_DIRECT	positive regulation of microtubule polymerization	17	0.3	0.0013	0.053
GOTERM_BP_DIRECT	negative regulation of gene expression, epigenetic	12	0.2	0.0013	0.053
GOTERM_BP_DIRECT	positive regulation by host of viral transcription	12	0.2	0.0013	0.053
GOTERM_BP_DIRECT	negative regulation of epidermal growth factor receptor signaling pathway	12	0.2	0.0013	0.053
GOTERM_BP_DIRECT	apoptotic mitochondrial changes	12	0.2	0.0013	0.053
GOTERM_BP_DIRECT	formation of cytoplasmic translation initiation complex	12	0.2	0.0013	0.053
GOTERM_BP_DIRECT	positive regulation of cell proliferation	182	3.2	0.0013	0.053
GOTERM_BP_DIRECT	liver regeneration	22	0.4	0.0013	0.053
GOTERM_BP_DIRECT	positive regulation of DNA repair	22	0.4	0.0013	0.053
GOTERM_BP_DIRECT	cytoplasmic translation	39	0.7	0.0014	0.055
GOTERM_BP_DIRECT	response to hydrogen peroxide	26	0.5	0.0014	0.056
GOTERM_BP_DIRECT	protein deubiquitination	45	0.8	0.0015	0.058
GOTERM_BP_DIRECT	negative regulation of extrinsic apoptotic signaling pathway	20	0.4	0.0015	0.058
GOTERM_BP_DIRECT	phagocytosis	32	0.6	0.0015	0.058
GOTERM_BP_DIRECT	mRNA transcription from RNA polymerase II promoter	23	0.4	0.0015	0.058
GOTERM_BP_DIRECT	phosphatidylinositol phosphorylation	27	0.5	0.0015	0.059
GOTERM_BP_DIRECT	positive regulation of MAPK cascade	62	1.1	0.0016	0.06
GOTERM_BP_DIRECT	regulation of cellular response to heat	11	0.2	0.0016	0.06
GOTERM_BP_DIRECT	nuclear-transcribed mRNA poly(A) tail shortening	14	0.2	0.0016	0.06
GOTERM_BP_DIRECT	histone H3-K4 trimethylation	14	0.2	0.0016	0.06
GOTERM_BP_DIRECT	mitotic spindle assembly checkpoint	18	0.3	0.0016	0.061
GOTERM_BP_DIRECT	protein K63-linked deubiquitination	18	0.3	0.0016	0.061
GOTERM_BP_DIRECT	autophagy	59	1	0.0017	0.061
GOTERM_BP_DIRECT	posttranscriptional regulation of gene expression	16	0.3	0.0017	0.062
GOTERM_BP_DIRECT	double-strand break repair via homologous recombination	40	0.7	0.0018	0.067
GOTERM_BP_DIRECT	neuron projection morphogenesis	30	0.5	0.0018	0.067
GOTERM_BP_DIRECT	erythrocyte differentiation	25	0.4	0.0018	0.067
GOTERM_BP_DIRECT	protein localization to chromatin	10	0.2	0.0019	0.067
GOTERM_BP_DIRECT	negative regulation of hippo signaling	10	0.2	0.0019	0.067
GOTERM_BP_DIRECT	negative regulation of ubiquitin protein ligase activity	10	0.2	0.0019	0.067
GOTERM_BP_DIRECT	Golgi ribbon formation	10	0.2	0.0019	0.067
GOTERM_BP_DIRECT	vesicle docking involved in exocytosis	19	0.3	0.002	0.069
GOTERM_BP_DIRECT	actomyosin structure organization	19	0.3	0.002	0.069
GOTERM_BP_DIRECT	positive regulation of transcription initiation from RNA polymerase II promoter	26	0.5	0.002	0.07
GOTERM_BP_DIRECT	mitotic sister chromatid cohesion	13	0.2	0.002	0.072
GOTERM_BP_DIRECT	endoplasmic reticulum tubular network organization	9	0.2	0.0021	0.074
GOTERM_BP_DIRECT	endothelial cell apoptotic process	9	0.2	0.0021	0.074
GOTERM_BP_DIRECT	positive regulation of protein localization to Cajal body	9	0.2	0.0021	0.074
GOTERM_BP_DIRECT	regulation of necroptotic process	7	0.1	0.0022	0.074
GOTERM_BP_DIRECT	microtubule cytoskeleton organization	53	0.9	0.0022	0.074
GOTERM_BP_DIRECT	positive regulation of histone H3-K4 methylation	15	0.3	0.0022	0.074
GOTERM_BP_DIRECT	tRNA aminoacylation for protein translation	15	0.3	0.0022	0.074
GOTERM_BP_DIRECT	regulation of focal adhesion assembly	15	0.3	0.0022	0.074
GOTERM_BP_DIRECT	regulation of G0 to G1 transition	15	0.3	0.0022	0.074
GOTERM_BP_DIRECT	G2/M transition of mitotic cell cycle	28	0.5	0.0022	0.076
GOTERM_BP_DIRECT	cell motility	20	0.4	0.0023	0.076
GOTERM_BP_DIRECT	UDP-N-acetylglucosamine biosynthetic process	8	0.1	0.0023	0.077
GOTERM_BP_DIRECT	canonical Wnt signaling pathway	41	0.7	0.0023	0.077
GOTERM_BP_DIRECT	positive regulation of protein kinase activity	29	0.5	0.0023	0.078
GOTERM_BP_DIRECT	positive regulation of transcription elongation from RNA polymerase II promoter	24	0.4	0.0024	0.079
GOTERM_BP_DIRECT	hemopoiesis	30	0.5	0.0024	0.081
GOTERM_BP_DIRECT	Wnt signaling pathway, planar cell polarity pathway	18	0.3	0.0025	0.083
GOTERM_BP_DIRECT	positive regulation of protein localization to nucleus	18	0.3	0.0025	0.083
GOTERM_BP_DIRECT	response to testosterone	21	0.4	0.0025	0.083
GOTERM_BP_DIRECT	extrinsic apoptotic signaling pathway	25	0.4	0.0025	0.083
GOTERM_BP_DIRECT	histone H2A monoubiquitination	12	0.2	0.0026	0.083
GOTERM_BP_DIRECT	centrosome localization	12	0.2	0.0026	0.083
GOTERM_BP_DIRECT	isotype switching	12	0.2	0.0026	0.083
GOTERM_BP_DIRECT	regulation of autophagy	33	0.6	0.0027	0.085
GOTERM_BP_DIRECT	negative regulation of protein binding	33	0.6	0.0027	0.085
GOTERM_BP_DIRECT	neuron projection development	51	0.9	0.0027	0.085
GOTERM_BP_DIRECT	regulation of double-strand break repair	16	0.3	0.0027	0.087
GOTERM_BP_DIRECT	regulation of nucleotide-excision repair	16	0.3	0.0027	0.087
GOTERM_BP_DIRECT	neuron migration	48	0.8	0.0028	0.087
GOTERM_BP_DIRECT	neuronal stem cell population maintenance	14	0.2	0.0028	0.088
GOTERM_BP_DIRECT	oocyte maturation	14	0.2	0.0028	0.088
GOTERM_BP_DIRECT	Ras protein signal transduction	38	0.7	0.0029	0.089
GOTERM_BP_DIRECT	cellular response to beta-amyloid	23	0.4	0.0031	0.095
GOTERM_BP_DIRECT	regulation of DNA replication	23	0.4	0.0031	0.095
GOTERM_BP_DIRECT	protein localization to plasma membrane	61	1.1	0.0032	0.098
GOTERM_BP_DIRECT	canonical glycolysis	11	0.2	0.0032	0.099
GOTERM_BP_DIRECT	striated muscle cell differentiation	11	0.2	0.0032	0.099
GOTERM_BP_DIRECT	forebrain development	24	0.4	0.0033	0.1
GOTERM_BP_DIRECT	positive regulation of glucose import	20	0.4	0.0033	0.1
GOTERM_BP_DIRECT	extrinsic apoptotic signaling pathway via death domain receptors	20	0.4	0.0033	0.1
GOTERM_BP_DIRECT	response to glucose	33	0.6	0.0034	0.1
GOTERM_BP_DIRECT	response to nutrient	33	0.6	0.0034	0.1
GOTERM_BP_DIRECT	protein kinase B signaling	25	0.4	0.0035	0.1
GOTERM_BP_DIRECT	negative regulation of stem cell proliferation	13	0.2	0.0036	0.11
GOTERM_BP_DIRECT	negative regulation of protein localization to nucleus	13	0.2	0.0036	0.11
GOTERM_BP_DIRECT	T cell differentiation	21	0.4	0.0036	0.11
GOTERM_BP_DIRECT	response to activity	26	0.5	0.0037	0.11
GOTERM_BP_DIRECT	embryonic organ development	18	0.3	0.0038	0.11
GOTERM_BP_DIRECT	protein K48-linked deubiquitination	18	0.3	0.0038	0.11
GOTERM_BP_DIRECT	centrosome cycle	22	0.4	0.0039	0.12
GOTERM_BP_DIRECT	gene silencing by RNA	22	0.4	0.0039	0.12
GOTERM_BP_DIRECT	primary miRNA processing	10	0.2	0.004	0.12
GOTERM_BP_DIRECT	cargo loading into COPII-coated vesicle	10	0.2	0.004	0.12
GOTERM_BP_DIRECT	histone H3-K9 demethylation	10	0.2	0.004	0.12
GOTERM_BP_DIRECT	cellular response to dexamethasone stimulus	19	0.3	0.0043	0.12
GOTERM_BP_DIRECT	regulation of translation	36	0.6	0.0044	0.13
GOTERM_BP_DIRECT	protein destabilization	24	0.4	0.0045	0.13
GOTERM_BP_DIRECT	positive regulation of histone deacetylation	12	0.2	0.0046	0.13
GOTERM_BP_DIRECT	negative regulation of stem cell differentiation	12	0.2	0.0046	0.13
GOTERM_BP_DIRECT	negative regulation of autophagy	25	0.4	0.0047	0.13
GOTERM_BP_DIRECT	regulation of cell differentiation	20	0.4	0.0047	0.13
GOTERM_BP_DIRECT	positive regulation of cell size	9	0.2	0.0049	0.14
GOTERM_BP_DIRECT	regulation of keratinocyte differentiation	9	0.2	0.0049	0.14
GOTERM_BP_DIRECT	regulation of cellular senescence	9	0.2	0.0049	0.14
GOTERM_BP_DIRECT	cellular response to insulin-like growth factor stimulus	9	0.2	0.0049	0.14
GOTERM_BP_DIRECT	positive regulation of macroautophagy	17	0.3	0.0049	0.14
GOTERM_BP_DIRECT	negative regulation of MAPK cascade	21	0.4	0.0051	0.14
GOTERM_BP_DIRECT	double-strand break repair via nonhomologous end joining	18	0.3	0.0055	0.15
GOTERM_BP_DIRECT	Golgi to plasma membrane transport	15	0.3	0.0056	0.15
GOTERM_BP_DIRECT	epidermal growth factor receptor signaling pathway	23	0.4	0.0057	0.16
GOTERM_BP_DIRECT	endosome to lysosome transport	23	0.4	0.0057	0.16
GOTERM_BP_DIRECT	protein desumoylation	8	0.1	0.0058	0.16
GOTERM_BP_DIRECT	morphogenesis of an epithelial sheet	8	0.1	0.0058	0.16
GOTERM_BP_DIRECT	nuclear-transcribed mRNA catabolic process, deadenylation-dependent decay	8	0.1	0.0058	0.16
GOTERM_BP_DIRECT	cellular response to nitric oxide	11	0.2	0.0059	0.16
GOTERM_BP_DIRECT	definitive hemopoiesis	11	0.2	0.0059	0.16
GOTERM_BP_DIRECT	insulin-like growth factor receptor signaling pathway	11	0.2	0.0059	0.16
GOTERM_BP_DIRECT	3'-UTR-mediated mRNA destabilization	11	0.2	0.0059	0.16
GOTERM_BP_DIRECT	cell death	19	0.3	0.0061	0.16
GOTERM_BP_DIRECT	peptidyl-tyrosine dephosphorylation	19	0.3	0.0061	0.16
GOTERM_BP_DIRECT	exocytosis	45	0.8	0.0061	0.16
GOTERM_BP_DIRECT	positive regulation of protein complex assembly	25	0.4	0.0062	0.16
GOTERM_BP_DIRECT	regulation of cell migration	43	0.8	0.0063	0.17
GOTERM_BP_DIRECT	negative regulation of fat cell differentiation	26	0.5	0.0064	0.17
GOTERM_BP_DIRECT	positive regulation of vascular endothelial growth factor production	16	0.3	0.0064	0.17
GOTERM_BP_DIRECT	membrane organization	16	0.3	0.0064	0.17
GOTERM_BP_DIRECT	regulation of cell adhesion	27	0.5	0.0065	0.17
GOTERM_BP_DIRECT	mitotic spindle assembly	20	0.4	0.0065	0.17
GOTERM_BP_DIRECT	mesenchymal cell differentiation	7	0.1	0.0066	0.17
GOTERM_BP_DIRECT	protein localization to nuclear envelope	7	0.1	0.0066	0.17
GOTERM_BP_DIRECT	circadian rhythm	30	0.5	0.0068	0.18
GOTERM_BP_DIRECT	regulation of cell growth	33	0.6	0.0069	0.18
GOTERM_BP_DIRECT	somitogenesis	21	0.4	0.007	0.18
GOTERM_BP_DIRECT	embryonic skeletal system morphogenesis	21	0.4	0.007	0.18
GOTERM_BP_DIRECT	endocytosis	74	1.3	0.007	0.18
GOTERM_BP_DIRECT	positive regulation of sequence-specific DNA binding transcription factor activity	46	0.8	0.0071	0.18
GOTERM_BP_DIRECT	negative regulation of apoptotic signaling pathway	17	0.3	0.0072	0.18
GOTERM_BP_DIRECT	alternative mRNA splicing, via spliceosome	14	0.2	0.0072	0.18
GOTERM_BP_DIRECT	response to arsenic-containing substance	10	0.2	0.0076	0.19
GOTERM_BP_DIRECT	regulation of insulin receptor signaling pathway	10	0.2	0.0076	0.19
GOTERM_BP_DIRECT	regulation of cellular protein localization	10	0.2	0.0076	0.19
GOTERM_BP_DIRECT	positive regulation of RNA splicing	10	0.2	0.0076	0.19
GOTERM_BP_DIRECT	translesion synthesis	10	0.2	0.0076	0.19
GOTERM_BP_DIRECT	wound healing, spreading of cells	10	0.2	0.0076	0.19
GOTERM_BP_DIRECT	intrinsic apoptotic signaling pathway in response to DNA damage	23	0.4	0.0076	0.19
GOTERM_BP_DIRECT	positive regulation of stress-activated MAPK cascade	12	0.2	0.0078	0.19
GOTERM_BP_DIRECT	estrous cycle	12	0.2	0.0078	0.19
GOTERM_BP_DIRECT	neuroblast proliferation	18	0.3	0.0079	0.19
GOTERM_BP_DIRECT	regulation of angiogenesis	18	0.3	0.0079	0.19
GOTERM_BP_DIRECT	regulation of microtubule cytoskeleton organization	18	0.3	0.0079	0.19
GOTERM_BP_DIRECT	fatty acid biosynthetic process	24	0.4	0.0079	0.19
GOTERM_BP_DIRECT	negative regulation of osteoblast differentiation	24	0.4	0.0079	0.19
GOTERM_BP_DIRECT	telomere maintenance	25	0.4	0.0081	0.2
GOTERM_BP_DIRECT	positive regulation of neuron differentiation	38	0.7	0.0081	0.2
GOTERM_BP_DIRECT	negative regulation of BMP signaling pathway	26	0.5	0.0082	0.2
GOTERM_BP_DIRECT	heterochromatin assembly	15	0.3	0.0084	0.2
GOTERM_BP_DIRECT	cellular glucose homeostasis	15	0.3	0.0084	0.2
GOTERM_BP_DIRECT	negative regulation of neuron differentiation	27	0.5	0.0084	0.2
GOTERM_BP_DIRECT	cell-cell adhesion	68	1.2	0.0084	0.2
GOTERM_BP_DIRECT	endosome organization	19	0.3	0.0085	0.2
GOTERM_BP_DIRECT	autophagosome assembly	28	0.5	0.0085	0.2
GOTERM_BP_DIRECT	protein catabolic process	29	0.5	0.0085	0.2
GOTERM_BP_DIRECT	neuron differentiation	63	1.1	0.0085	0.2
GOTERM_BP_DIRECT	positive regulation of endothelial cell proliferation	32	0.6	0.0085	0.2
GOTERM_BP_DIRECT	negative regulation of neuron apoptotic process	58	1	0.0086	0.2
GOTERM_BP_DIRECT	regulation of cell shape	57	1	0.0088	0.21
GOTERM_BP_DIRECT	membrane fusion	20	0.4	0.009	0.21
GOTERM_BP_DIRECT	mitotic metaphase plate congression	20	0.4	0.009	0.21
GOTERM_BP_DIRECT	T cell proliferation	20	0.4	0.009	0.21
GOTERM_BP_DIRECT	heart morphogenesis	20	0.4	0.009	0.21
GOTERM_BP_DIRECT	protein targeting	20	0.4	0.009	0.21
GOTERM_BP_DIRECT	cellular response to estradiol stimulus	20	0.4	0.009	0.21
GOTERM_BP_DIRECT	endodermal cell differentiation	16	0.3	0.0093	0.22
GOTERM_BP_DIRECT	histone H4 acetylation	21	0.4	0.0094	0.22
GOTERM_BP_DIRECT	protein monoubiquitination	21	0.4	0.0094	0.22
GOTERM_BP_DIRECT	positive regulation of receptor-mediated endocytosis	13	0.2	0.0095	0.22
GOTERM_BP_DIRECT	positive regulation of mRNA catabolic process	9	0.2	0.0097	0.22
GOTERM_BP_DIRECT	mitotic G1 DNA damage checkpoint	9	0.2	0.0097	0.22
GOTERM_BP_DIRECT	organelle organization	9	0.2	0.0097	0.22
GOTERM_BP_DIRECT	thymus development	22	0.4	0.0097	0.22
GOTERM_BP_DIRECT	negative regulation of cell migration	63	1.1	0.0098	0.22
GOTERM_BP_DIRECT	retrograde vesicle-mediated transport, Golgi to ER	23	0.4	0.01	0.22
GOTERM_BP_DIRECT	positive regulation of G1/S transition of mitotic cell cycle	23	0.4	0.01	0.22
GOTERM_BP_DIRECT	positive regulation of transcription from RNA polymerase III promoter	11	0.2	0.01	0.22
GOTERM_BP_DIRECT	stress fiber assembly	11	0.2	0.01	0.22
GOTERM_BP_DIRECT	chondroitin sulfate biosynthetic process	11	0.2	0.01	0.22
GOTERM_BP_DIRECT	platelet-derived growth factor receptor signaling pathway	17	0.3	0.01	0.22
GOTERM_BP_DIRECT	positive regulation of telomerase activity	17	0.3	0.01	0.22
GOTERM_BP_DIRECT	positive regulation of transforming growth factor beta receptor signaling pathway	17	0.3	0.01	0.22
GOTERM_BP_DIRECT	intrinsic apoptotic signaling pathway	17	0.3	0.01	0.22
GOTERM_BP_DIRECT	chaperone mediated protein folding requiring cofactor	17	0.3	0.01	0.22
GOTERM_BP_DIRECT	protein targeting to membrane	24	0.4	0.01	0.22
GOTERM_BP_DIRECT	positive regulation of cysteine-type endopeptidase activity involved in apoptotic process	24	0.4	0.01	0.22
GOTERM_BP_DIRECT	mRNA export from nucleus	25	0.4	0.01	0.23
GOTERM_BP_DIRECT	negative regulation of cell cycle	25	0.4	0.01	0.23
GOTERM_BP_DIRECT	insulin receptor signaling pathway	26	0.5	0.011	0.23
GOTERM_BP_DIRECT	protein modification process	32	0.6	0.011	0.23
GOTERM_BP_DIRECT	regulation of mitotic cell cycle	27	0.5	0.011	0.23
GOTERM_BP_DIRECT	hippocampus development	30	0.5	0.011	0.23
GOTERM_BP_DIRECT	regulation of protein binding	14	0.2	0.011	0.23
GOTERM_BP_DIRECT	limb development	18	0.3	0.011	0.23
GOTERM_BP_DIRECT	response to progesterone	18	0.3	0.011	0.23
GOTERM_BP_DIRECT	membrane fission	19	0.3	0.012	0.25
GOTERM_BP_DIRECT	muscle organ development	39	0.7	0.012	0.25
GOTERM_BP_DIRECT	nucleotide-excision repair	20	0.4	0.012	0.25
GOTERM_BP_DIRECT	focal adhesion assembly	15	0.3	0.012	0.25
GOTERM_BP_DIRECT	response to gamma radiation	15	0.3	0.012	0.25
GOTERM_BP_DIRECT	monoubiquitinated histone H2A deubiquitination	15	0.3	0.012	0.25
GOTERM_BP_DIRECT	skin morphogenesis	8	0.1	0.012	0.25
GOTERM_BP_DIRECT	CRD-mediated mRNA stabilization	8	0.1	0.012	0.25
GOTERM_BP_DIRECT	miRNA metabolic process	8	0.1	0.012	0.25
GOTERM_BP_DIRECT	protein localization to chromosome, telomeric region	8	0.1	0.012	0.25
GOTERM_BP_DIRECT	positive regulation of chromosome segregation	8	0.1	0.012	0.25
GOTERM_BP_DIRECT	postreplication repair	8	0.1	0.012	0.25
GOTERM_BP_DIRECT	positive regulation of extrinsic apoptotic signaling pathway via death domain receptors	8	0.1	0.012	0.25
GOTERM_BP_DIRECT	lung development	36	0.6	0.012	0.25
GOTERM_BP_DIRECT	negative regulation of sequence-specific DNA binding transcription factor activity	36	0.6	0.012	0.25
GOTERM_BP_DIRECT	gamete generation	12	0.2	0.012	0.25
GOTERM_BP_DIRECT	activin receptor signaling pathway	12	0.2	0.012	0.25
GOTERM_BP_DIRECT	cellular response to nutrient levels	12	0.2	0.012	0.25
GOTERM_BP_DIRECT	regulation of innate immune response	12	0.2	0.012	0.25
GOTERM_BP_DIRECT	phosphatidylinositol-3-phosphate biosynthetic process	12	0.2	0.012	0.25
GOTERM_BP_DIRECT	negative regulation of ossification	12	0.2	0.012	0.25
GOTERM_BP_DIRECT	negative regulation of stem cell population maintenance	12	0.2	0.012	0.25
GOTERM_BP_DIRECT	response to retinoic acid	23	0.4	0.013	0.26
GOTERM_BP_DIRECT	cellular response to starvation	31	0.5	0.013	0.26
GOTERM_BP_DIRECT	ERK1 and ERK2 cascade	24	0.4	0.013	0.26
GOTERM_BP_DIRECT	translation	77	1.4	0.013	0.26
GOTERM_BP_DIRECT	negative regulation of tyrosine phosphorylation of STAT protein	10	0.2	0.013	0.26
GOTERM_BP_DIRECT	regulation of transcription involved in G1/S transition of mitotic cell cycle	10	0.2	0.013	0.26
GOTERM_BP_DIRECT	mRNA destabilization	10	0.2	0.013	0.26
GOTERM_BP_DIRECT	positive regulation of glycogen biosynthetic process	10	0.2	0.013	0.26
GOTERM_BP_DIRECT	positive regulation of mitotic cell cycle	16	0.3	0.013	0.26
GOTERM_BP_DIRECT	DNA biosynthetic process	16	0.3	0.013	0.26
GOTERM_BP_DIRECT	mRNA catabolic process	16	0.3	0.013	0.26
GOTERM_BP_DIRECT	extrinsic apoptotic signaling pathway in absence of ligand	17	0.3	0.014	0.28
GOTERM_BP_DIRECT	intra-Golgi vesicle-mediated transport	17	0.3	0.014	0.28
GOTERM_BP_DIRECT	negative regulation of neurogenesis	13	0.2	0.014	0.28
GOTERM_BP_DIRECT	U2-type prespliceosome assembly	13	0.2	0.014	0.28
GOTERM_BP_DIRECT	negative regulation of mRNA splicing, via spliceosome	13	0.2	0.014	0.28
GOTERM_BP_DIRECT	negative regulation of insulin receptor signaling pathway	18	0.3	0.015	0.29
GOTERM_BP_DIRECT	B cell differentiation	34	0.6	0.015	0.29
GOTERM_BP_DIRECT	negative regulation of nuclear-transcribed mRNA catabolic process, deadenylation-dependent decay	7	0.1	0.015	0.29
GOTERM_BP_DIRECT	small RNA loading onto RISC	7	0.1	0.015	0.29
GOTERM_BP_DIRECT	negative regulation of muscle cell differentiation	7	0.1	0.015	0.29
GOTERM_BP_DIRECT	RNA secondary structure unwinding	7	0.1	0.015	0.29
GOTERM_BP_DIRECT	reelin-mediated signaling pathway	7	0.1	0.015	0.29
GOTERM_BP_DIRECT	regulation of microtubule-based process	7	0.1	0.015	0.29
GOTERM_BP_DIRECT	response to UV-B	7	0.1	0.015	0.29
GOTERM_BP_DIRECT	regulation of mitotic cell cycle phase transition	7	0.1	0.015	0.29
GOTERM_BP_DIRECT	deadenylation-dependent decapping of nuclear-transcribed mRNA	7	0.1	0.015	0.29
GOTERM_BP_DIRECT	viral RNA genome replication	7	0.1	0.015	0.29
GOTERM_BP_DIRECT	response to L-glutamate	7	0.1	0.015	0.29
GOTERM_BP_DIRECT	vesicle tethering involved in exocytosis	7	0.1	0.015	0.29
GOTERM_BP_DIRECT	neuron death	7	0.1	0.015	0.29
GOTERM_BP_DIRECT	nuclear pore complex assembly	7	0.1	0.015	0.29
GOTERM_BP_DIRECT	amino acid transport	19	0.3	0.015	0.29
GOTERM_BP_DIRECT	establishment of protein localization	19	0.3	0.015	0.29
GOTERM_BP_DIRECT	cellular response to cadmium ion	19	0.3	0.015	0.29
GOTERM_BP_DIRECT	cytoskeleton organization	52	0.9	0.016	0.29
GOTERM_BP_DIRECT	positive regulation of JUN kinase activity	20	0.4	0.016	0.3
GOTERM_BP_DIRECT	stem cell differentiation	20	0.4	0.016	0.3
GOTERM_BP_DIRECT	branching involved in ureteric bud morphogenesis	20	0.4	0.016	0.3
GOTERM_BP_DIRECT	DNA replication-independent nucleosome assembly	14	0.2	0.016	0.3
GOTERM_BP_DIRECT	cellular response to hydrogen peroxide	30	0.5	0.016	0.3
GOTERM_BP_DIRECT	nucleosome disassembly	11	0.2	0.016	0.3
GOTERM_BP_DIRECT	axon regeneration	11	0.2	0.016	0.3
GOTERM_BP_DIRECT	cellular response to extracellular stimulus	11	0.2	0.016	0.3
GOTERM_BP_DIRECT	fibroblast migration	11	0.2	0.016	0.3
GOTERM_BP_DIRECT	sterol transport	11	0.2	0.016	0.3
GOTERM_BP_DIRECT	macroautophagy	28	0.5	0.017	0.3
GOTERM_BP_DIRECT	response to peptide hormone	24	0.4	0.017	0.31
GOTERM_BP_DIRECT	positive regulation of cell adhesion	25	0.4	0.017	0.31
GOTERM_BP_DIRECT	actin cytoskeleton reorganization	25	0.4	0.017	0.31
GOTERM_BP_DIRECT	DNA methylation	15	0.3	0.017	0.31
GOTERM_BP_DIRECT	positive regulation of lamellipodium assembly	15	0.3	0.017	0.31
GOTERM_BP_DIRECT	positive regulation of peptidyl-threonine phosphorylation	15	0.3	0.017	0.31
GOTERM_BP_DIRECT	positive regulation of leukocyte adhesion to vascular endothelial cell	9	0.2	0.017	0.31
GOTERM_BP_DIRECT	positive regulation of response to DNA damage stimulus	9	0.2	0.017	0.31
GOTERM_BP_DIRECT	vesicle organization	9	0.2	0.017	0.31
GOTERM_BP_DIRECT	motor neuron apoptotic process	9	0.2	0.017	0.31
GOTERM_BP_DIRECT	layer formation in cerebral cortex	9	0.2	0.017	0.31
GOTERM_BP_DIRECT	negative regulation of translational initiation	9	0.2	0.017	0.31
GOTERM_BP_DIRECT	ventricular trabecula myocardium morphogenesis	9	0.2	0.017	0.31
GOTERM_BP_DIRECT	negative regulation of epidermal growth factor-activated receptor activity	9	0.2	0.017	0.31
GOTERM_BP_DIRECT	male gonad development	42	0.7	0.018	0.32
GOTERM_BP_DIRECT	response to estradiol	42	0.7	0.018	0.32
GOTERM_BP_DIRECT	negative regulation of cyclin-dependent protein serine/threonine kinase activity	16	0.3	0.018	0.32
GOTERM_BP_DIRECT	skeletal system morphogenesis	16	0.3	0.018	0.32
GOTERM_BP_DIRECT	negative regulation of proteasomal ubiquitin-dependent protein catabolic process	16	0.3	0.018	0.32
GOTERM_BP_DIRECT	miRNA loading onto RISC involved in gene silencing by miRNA	6	0.1	0.019	0.32
GOTERM_BP_DIRECT	negative regulation of histone H3-K9 trimethylation	6	0.1	0.019	0.32
GOTERM_BP_DIRECT	neural tube formation	6	0.1	0.019	0.32
GOTERM_BP_DIRECT	macrophage derived foam cell differentiation	6	0.1	0.019	0.32
GOTERM_BP_DIRECT	adiponectin-activated signaling pathway	6	0.1	0.019	0.32
GOTERM_BP_DIRECT	positive regulation of activin receptor signaling pathway	6	0.1	0.019	0.32
GOTERM_BP_DIRECT	positive regulation of DNA-templated transcription, initiation	6	0.1	0.019	0.32
GOTERM_BP_DIRECT	regulation of fatty acid metabolic process	6	0.1	0.019	0.32
GOTERM_BP_DIRECT	regulation of cellular response to insulin stimulus	6	0.1	0.019	0.32
GOTERM_BP_DIRECT	positive regulation of miRNA mediated inhibition of translation	6	0.1	0.019	0.32
GOTERM_BP_DIRECT	mitral valve morphogenesis	6	0.1	0.019	0.32
GOTERM_BP_DIRECT	cleavage furrow formation	6	0.1	0.019	0.32
GOTERM_BP_DIRECT	central nervous system neuron axonogenesis	6	0.1	0.019	0.32
GOTERM_BP_DIRECT	autophagosome docking	6	0.1	0.019	0.32
GOTERM_BP_DIRECT	heart valve development	6	0.1	0.019	0.32
GOTERM_BP_DIRECT	cardiac muscle cell proliferation	12	0.2	0.019	0.32
GOTERM_BP_DIRECT	positive regulation of ubiquitin-protein transferase activity	12	0.2	0.019	0.32
GOTERM_BP_DIRECT	tissue homeostasis	12	0.2	0.019	0.32
GOTERM_BP_DIRECT	regulation of mRNA splicing, via spliceosome	12	0.2	0.019	0.32
GOTERM_BP_DIRECT	positive regulation of T cell differentiation	17	0.3	0.019	0.33
GOTERM_BP_DIRECT	positive regulation of epithelial cell migration	18	0.3	0.02	0.34
GOTERM_BP_DIRECT	negative regulation of protein catabolic process	20	0.4	0.021	0.35
GOTERM_BP_DIRECT	blood vessel development	20	0.4	0.021	0.35
GOTERM_BP_DIRECT	positive regulation of Notch signaling pathway	20	0.4	0.021	0.35
GOTERM_BP_DIRECT	Rac protein signal transduction	13	0.2	0.021	0.35
GOTERM_BP_DIRECT	coronary vasculature development	13	0.2	0.021	0.35
GOTERM_BP_DIRECT	adrenal gland development	13	0.2	0.021	0.35
GOTERM_BP_DIRECT	receptor internalization	21	0.4	0.021	0.35
GOTERM_BP_DIRECT	outflow tract morphogenesis	21	0.4	0.021	0.35
GOTERM_BP_DIRECT	positive regulation of fibroblast proliferation	24	0.4	0.021	0.35
GOTERM_BP_DIRECT	positive regulation of fat cell differentiation	23	0.4	0.021	0.35
GOTERM_BP_DIRECT	posttranscriptional gene silencing	5	0.1	0.021	0.35
GOTERM_BP_DIRECT	cellular response to indole-3-methanol	5	0.1	0.021	0.35
GOTERM_BP_DIRECT	positive regulation of chromosome condensation	5	0.1	0.021	0.35
GOTERM_BP_DIRECT	regulation of striated muscle tissue development	5	0.1	0.021	0.35
GOTERM_BP_DIRECT	polarized epithelial cell differentiation	5	0.1	0.021	0.35
GOTERM_BP_DIRECT	regulation of microvillus assembly	5	0.1	0.021	0.35
GOTERM_BP_DIRECT	centrosome duplication	10	0.2	0.021	0.35
GOTERM_BP_DIRECT	vesicle transport along microtubule	10	0.2	0.021	0.35
GOTERM_BP_DIRECT	nuclear migration	10	0.2	0.021	0.35
GOTERM_BP_DIRECT	post-Golgi vesicle-mediated transport	10	0.2	0.021	0.35
GOTERM_BP_DIRECT	epithelial tube branching involved in lung morphogenesis	10	0.2	0.021	0.35
GOTERM_BP_DIRECT	peptidyl-tyrosine phosphorylation	50	0.9	0.022	0.36
GOTERM_BP_DIRECT	BMP signaling pathway	34	0.6	0.022	0.36
GOTERM_BP_DIRECT	positive regulation of GTPase activity	65	1.1	0.022	0.36
GOTERM_BP_DIRECT	negative regulation of extrinsic apoptotic signaling pathway via death domain receptors	14	0.2	0.022	0.36
GOTERM_BP_DIRECT	skeletal system development	49	0.9	0.023	0.36
GOTERM_BP_DIRECT	positive regulation of methylation-dependent chromatin silencing	8	0.1	0.023	0.36
GOTERM_BP_DIRECT	mesodermal cell differentiation	8	0.1	0.023	0.36
GOTERM_BP_DIRECT	response to muramyl dipeptide	8	0.1	0.023	0.36
GOTERM_BP_DIRECT	adherens junction assembly	8	0.1	0.023	0.36
GOTERM_BP_DIRECT	protein localization to kinetochore	8	0.1	0.023	0.36
GOTERM_BP_DIRECT	DNA-templated transcription, termination	8	0.1	0.023	0.36
GOTERM_BP_DIRECT	attachment of mitotic spindle microtubules to kinetochore	8	0.1	0.023	0.36
GOTERM_BP_DIRECT	suckling behavior	8	0.1	0.023	0.36
GOTERM_BP_DIRECT	regulation of chromosome segregation	8	0.1	0.023	0.36
GOTERM_BP_DIRECT	positive regulation of gene silencing by miRNA	8	0.1	0.023	0.36
GOTERM_BP_DIRECT	regulation of actin cytoskeleton organization	32	0.6	0.023	0.36
GOTERM_BP_DIRECT	positive regulation of phosphorylation	15	0.3	0.024	0.37
GOTERM_BP_DIRECT	positive regulation of catalytic activity	15	0.3	0.024	0.37
GOTERM_BP_DIRECT	cellular response to gamma radiation	15	0.3	0.024	0.37
GOTERM_BP_DIRECT	endothelial cell migration	16	0.3	0.025	0.39
GOTERM_BP_DIRECT	negative regulation of stress fiber assembly	16	0.3	0.025	0.39
GOTERM_BP_DIRECT	odontogenesis	16	0.3	0.025	0.39
GOTERM_BP_DIRECT	hippo signaling	11	0.2	0.025	0.39
GOTERM_BP_DIRECT	embryonic placenta development	11	0.2	0.025	0.39
GOTERM_BP_DIRECT	regulation of mitotic spindle organization	11	0.2	0.025	0.39
GOTERM_BP_DIRECT	inactivation of MAPK activity	11	0.2	0.025	0.39
GOTERM_BP_DIRECT	labyrinthine layer blood vessel development	11	0.2	0.025	0.39
GOTERM_BP_DIRECT	glucose metabolic process	27	0.5	0.025	0.39
GOTERM_BP_DIRECT	cholesterol biosynthetic process	17	0.3	0.025	0.39
GOTERM_BP_DIRECT	energy homeostasis	19	0.3	0.026	0.41
GOTERM_BP_DIRECT	protein localization to nucleus	19	0.3	0.026	0.41
GOTERM_BP_DIRECT	positive regulation of vascular smooth muscle cell proliferation	23	0.4	0.026	0.41
GOTERM_BP_DIRECT	positive regulation of nitric oxide biosynthetic process	21	0.4	0.026	0.41
GOTERM_BP_DIRECT	sphingolipid biosynthetic process	21	0.4	0.026	0.41
GOTERM_BP_DIRECT	retrograde transport, endosome to Golgi	32	0.6	0.027	0.42
GOTERM_BP_DIRECT	multivesicular body sorting pathway	12	0.2	0.027	0.42
GOTERM_BP_DIRECT	membrane protein ectodomain proteolysis	12	0.2	0.027	0.42
GOTERM_BP_DIRECT	negative regulation of protein phosphorylation	31	0.5	0.028	0.43
GOTERM_BP_DIRECT	negative regulation of epithelial cell migration	9	0.2	0.028	0.43
GOTERM_BP_DIRECT	histone H4-K16 acetylation	9	0.2	0.028	0.43
GOTERM_BP_DIRECT	negative regulation of smooth muscle cell migration	9	0.2	0.028	0.43
GOTERM_BP_DIRECT	somatic hypermutation of immunoglobulin genes	9	0.2	0.028	0.43
GOTERM_BP_DIRECT	negative regulation of protein import into nucleus	9	0.2	0.028	0.43
GOTERM_BP_DIRECT	peptidyl-serine dephosphorylation	9	0.2	0.028	0.43
GOTERM_BP_DIRECT	negative regulation of epithelial cell apoptotic process	9	0.2	0.028	0.43
GOTERM_BP_DIRECT	female pregnancy	36	0.6	0.029	0.43
GOTERM_BP_DIRECT	sister chromatid cohesion	13	0.2	0.029	0.43
GOTERM_BP_DIRECT	positive regulation of interleukin-17 production	13	0.2	0.029	0.43
GOTERM_BP_DIRECT	regulation of cell cycle G1/S phase transition	7	0.1	0.03	0.43
GOTERM_BP_DIRECT	positive regulation of cellular component movement	7	0.1	0.03	0.43
GOTERM_BP_DIRECT	positive regulation of establishment of protein localization to telomere	7	0.1	0.03	0.43
GOTERM_BP_DIRECT	chromatin assembly	7	0.1	0.03	0.43
GOTERM_BP_DIRECT	regulation of neural precursor cell proliferation	7	0.1	0.03	0.43
GOTERM_BP_DIRECT	histone mRNA catabolic process	7	0.1	0.03	0.43
GOTERM_BP_DIRECT	modulation of age-related behavioral decline	7	0.1	0.03	0.43
GOTERM_BP_DIRECT	negative regulation of lipid storage	7	0.1	0.03	0.43
GOTERM_BP_DIRECT	positive regulation of glucose metabolic process	7	0.1	0.03	0.43
GOTERM_BP_DIRECT	transmembrane receptor protein serine/threonine kinase signaling pathway	7	0.1	0.03	0.43
GOTERM_BP_DIRECT	positive regulation of transcription from RNA polymerase II promoter involved in cellular response to chemical stimulus	7	0.1	0.03	0.43
GOTERM_BP_DIRECT	somatic stem cell division	7	0.1	0.03	0.43
GOTERM_BP_DIRECT	negative regulation of neuron projection development	28	0.5	0.03	0.44
GOTERM_BP_DIRECT	negative regulation of epithelial cell proliferation	27	0.5	0.03	0.45
GOTERM_BP_DIRECT	cellular response to oxidative stress	34	0.6	0.03	0.45
GOTERM_BP_DIRECT	metanephros development	14	0.2	0.031	0.45
GOTERM_BP_DIRECT	ribosomal large subunit biogenesis	14	0.2	0.031	0.45
GOTERM_BP_DIRECT	viral protein processing	15	0.3	0.032	0.46
GOTERM_BP_DIRECT	embryonic forelimb morphogenesis	15	0.3	0.032	0.46
GOTERM_BP_DIRECT	positive regulation of DNA replication	15	0.3	0.032	0.46
GOTERM_BP_DIRECT	face morphogenesis	15	0.3	0.032	0.46
GOTERM_BP_DIRECT	endocytic recycling	24	0.4	0.032	0.46
GOTERM_BP_DIRECT	regulation of protein localization	32	0.6	0.032	0.47
GOTERM_BP_DIRECT	regulation of small GTPase mediated signal transduction	42	0.7	0.032	0.47
GOTERM_BP_DIRECT	negative regulation of JAK-STAT cascade	10	0.2	0.033	0.47
GOTERM_BP_DIRECT	actin filament-based movement	10	0.2	0.033	0.47
GOTERM_BP_DIRECT	endocardial cushion morphogenesis	10	0.2	0.033	0.47
GOTERM_BP_DIRECT	lipid particle organization	10	0.2	0.033	0.47
GOTERM_BP_DIRECT	response to heat	22	0.4	0.033	0.47
GOTERM_BP_DIRECT	chondrocyte differentiation	22	0.4	0.033	0.47
GOTERM_BP_DIRECT	visual learning	21	0.4	0.033	0.47
GOTERM_BP_DIRECT	lactation	20	0.4	0.033	0.47
GOTERM_BP_DIRECT	mitophagy	19	0.3	0.033	0.47
GOTERM_BP_DIRECT	regulation of embryonic development	19	0.3	0.033	0.47
GOTERM_BP_DIRECT	receptor-mediated endocytosis	29	0.5	0.035	0.49
GOTERM_BP_DIRECT	cell-matrix adhesion	39	0.7	0.035	0.5
GOTERM_BP_DIRECT	response to lipopolysaccharide	54	1	0.036	0.5
GOTERM_BP_DIRECT	face development	11	0.2	0.036	0.5
GOTERM_BP_DIRECT	protein localization to centrosome	11	0.2	0.036	0.5
GOTERM_BP_DIRECT	interleukin-1-mediated signaling pathway	11	0.2	0.036	0.5
GOTERM_BP_DIRECT	glycogen biosynthetic process	11	0.2	0.036	0.5
GOTERM_BP_DIRECT	regulated exocytosis	11	0.2	0.036	0.5
GOTERM_BP_DIRECT	response to lead ion	11	0.2	0.036	0.5
GOTERM_BP_DIRECT	cell migration involved in sprouting angiogenesis	11	0.2	0.036	0.5
GOTERM_BP_DIRECT	intermediate filament cytoskeleton organization	11	0.2	0.036	0.5
GOTERM_BP_DIRECT	negative regulation of cysteine-type endopeptidase activity involved in apoptotic process	27	0.5	0.036	0.51
GOTERM_BP_DIRECT	regulation of glycolytic process	8	0.1	0.038	0.51
GOTERM_BP_DIRECT	negative regulation by host of viral transcription	8	0.1	0.038	0.51
GOTERM_BP_DIRECT	magnesium ion transport	8	0.1	0.038	0.51
GOTERM_BP_DIRECT	regulation of osteoclast differentiation	8	0.1	0.038	0.51
GOTERM_BP_DIRECT	receptor catabolic process	8	0.1	0.038	0.51
GOTERM_BP_DIRECT	negative regulation of multicellular organism growth	8	0.1	0.038	0.51
GOTERM_BP_DIRECT	rRNA transcription	8	0.1	0.038	0.51
GOTERM_BP_DIRECT	cellular response to leucine starvation	8	0.1	0.038	0.51
GOTERM_BP_DIRECT	p38MAPK cascade	8	0.1	0.038	0.51
GOTERM_BP_DIRECT	negative regulation of ubiquitin-protein transferase activity	8	0.1	0.038	0.51
GOTERM_BP_DIRECT	nuclear export	8	0.1	0.038	0.51
GOTERM_BP_DIRECT	protein localization to lysosome	8	0.1	0.038	0.51
GOTERM_BP_DIRECT	prostate gland development	8	0.1	0.038	0.51
GOTERM_BP_DIRECT	UV protection	8	0.1	0.038	0.51
GOTERM_BP_DIRECT	vasculogenesis	25	0.4	0.038	0.51
GOTERM_BP_DIRECT	positive regulation of glycolytic process	12	0.2	0.038	0.51
GOTERM_BP_DIRECT	mitotic cell cycle phase transition	12	0.2	0.038	0.51
GOTERM_BP_DIRECT	hematopoietic stem cell proliferation	12	0.2	0.038	0.51
GOTERM_BP_DIRECT	regulation of cell morphogenesis	12	0.2	0.038	0.51
GOTERM_BP_DIRECT	positive regulation of protein autophosphorylation	12	0.2	0.038	0.51
GOTERM_BP_DIRECT	positive regulation of insulin receptor signaling pathway	12	0.2	0.038	0.51
GOTERM_BP_DIRECT	long-chain fatty acid import	6	0.1	0.039	0.51
GOTERM_BP_DIRECT	regulation of cell junction assembly	6	0.1	0.039	0.51
GOTERM_BP_DIRECT	cytoplasmic sequestering of NF-kappaB	6	0.1	0.039	0.51
GOTERM_BP_DIRECT	regulation of protein import into nucleus	6	0.1	0.039	0.51
GOTERM_BP_DIRECT	regulation of lipid storage	6	0.1	0.039	0.51
GOTERM_BP_DIRECT	histone H2A-K119 monoubiquitination	6	0.1	0.039	0.51
GOTERM_BP_DIRECT	regulation of protein transport	6	0.1	0.039	0.51
GOTERM_BP_DIRECT	female meiotic division	6	0.1	0.039	0.51
GOTERM_BP_DIRECT	endoplasmic reticulum membrane organization	6	0.1	0.039	0.51
GOTERM_BP_DIRECT	positive regulation of histone phosphorylation	6	0.1	0.039	0.51
GOTERM_BP_DIRECT	osteoclast development	6	0.1	0.039	0.51
GOTERM_BP_DIRECT	regulation of organ growth	6	0.1	0.039	0.51
GOTERM_BP_DIRECT	anterior/posterior axis specification, embryo	6	0.1	0.039	0.51
GOTERM_BP_DIRECT	negative regulation of protein kinase activity by regulation of protein phosphorylation	6	0.1	0.039	0.51
GOTERM_BP_DIRECT	positive regulation of melanin biosynthetic process	6	0.1	0.039	0.51
GOTERM_BP_DIRECT	negative regulation of protein dephosphorylation	6	0.1	0.039	0.51
GOTERM_BP_DIRECT	glutamine transport	6	0.1	0.039	0.51
GOTERM_BP_DIRECT	activation of cysteine-type endopeptidase activity involved in apoptotic process	31	0.5	0.039	0.51
GOTERM_BP_DIRECT	keratinocyte differentiation	24	0.4	0.039	0.51
GOTERM_BP_DIRECT	positive regulation of protein localization to plasma membrane	23	0.4	0.04	0.52
GOTERM_BP_DIRECT	multicellular organism development	72	1.3	0.04	0.52
GOTERM_BP_DIRECT	ATP synthesis coupled proton transport	13	0.2	0.04	0.52
GOTERM_BP_DIRECT	positive regulation of vascular associated smooth muscle cell migration	13	0.2	0.04	0.52
GOTERM_BP_DIRECT	oligodendrocyte development	13	0.2	0.04	0.52
GOTERM_BP_DIRECT	positive regulation of peptidyl-tyrosine phosphorylation	35	0.6	0.04	0.52
GOTERM_BP_DIRECT	positive regulation of tumor necrosis factor production	39	0.7	0.041	0.53
GOTERM_BP_DIRECT	entrainment of circadian clock by photoperiod	14	0.2	0.041	0.53
GOTERM_BP_DIRECT	anterograde axonal transport	14	0.2	0.041	0.53
GOTERM_BP_DIRECT	negative regulation of NF-kappaB transcription factor activity	34	0.6	0.041	0.54
GOTERM_BP_DIRECT	substantia nigra development	20	0.4	0.041	0.54
GOTERM_BP_DIRECT	phosphatidylinositol-mediated signaling	20	0.4	0.041	0.54
GOTERM_BP_DIRECT	positive regulation of angiogenesis	56	1	0.042	0.54
GOTERM_BP_DIRECT	mRNA stabilization	15	0.3	0.042	0.54
GOTERM_BP_DIRECT	post-translational protein modification	15	0.3	0.042	0.54
GOTERM_BP_DIRECT	chromatin silencing	19	0.3	0.042	0.54
GOTERM_BP_DIRECT	positive regulation of B cell proliferation	19	0.3	0.042	0.54
GOTERM_BP_DIRECT	negative regulation of MAP kinase activity	19	0.3	0.042	0.54
GOTERM_BP_DIRECT	protein K63-linked ubiquitination	19	0.3	0.042	0.54
GOTERM_BP_DIRECT	cAMP-mediated signaling	16	0.3	0.042	0.54
GOTERM_BP_DIRECT	positive regulation of interleukin-2 production	16	0.3	0.042	0.54
GOTERM_BP_DIRECT	axon extension	16	0.3	0.042	0.54
GOTERM_BP_DIRECT	ureteric bud development	16	0.3	0.042	0.54
GOTERM_BP_DIRECT	positive regulation of double-strand break repair via homologous recombination	17	0.3	0.042	0.54
GOTERM_BP_DIRECT	actin filament polymerization	17	0.3	0.042	0.54
GOTERM_BP_DIRECT	epithelial cell apoptotic process	9	0.2	0.043	0.54
GOTERM_BP_DIRECT	cellular response to hepatocyte growth factor stimulus	9	0.2	0.043	0.54
GOTERM_BP_DIRECT	cellular response to steroid hormone stimulus	9	0.2	0.043	0.54
GOTERM_BP_DIRECT	negative regulation of intracellular estrogen receptor signaling pathway	9	0.2	0.043	0.54
GOTERM_BP_DIRECT	regulation of cell motility	9	0.2	0.043	0.54
GOTERM_BP_DIRECT	response to wounding	27	0.5	0.043	0.54
GOTERM_BP_DIRECT	animal organ morphogenesis	48	0.8	0.044	0.55
GOTERM_BP_DIRECT	cell morphogenesis	32	0.6	0.044	0.55
GOTERM_BP_DIRECT	cellular response to drug	26	0.5	0.045	0.56
GOTERM_BP_DIRECT	cilium assembly	73	1.3	0.046	0.58
GOTERM_BP_DIRECT	positive regulation of MAP kinase activity	30	0.5	0.047	0.58
GOTERM_BP_DIRECT	negative regulation of DNA replication	10	0.2	0.047	0.59
GOTERM_BP_DIRECT	nuclear-transcribed mRNA catabolic process	10	0.2	0.047	0.59
GOTERM_BP_DIRECT	positive regulation of autophagosome assembly	10	0.2	0.047	0.59
GOTERM_BP_DIRECT	negative regulation of anoikis	10	0.2	0.047	0.59
GOTERM_BP_DIRECT	cytoskeleton-dependent intracellular transport	10	0.2	0.047	0.59
GOTERM_BP_DIRECT	myelination in peripheral nervous system	10	0.2	0.047	0.59
GOTERM_BP_DIRECT	fat cell differentiation	29	0.5	0.048	0.59
GOTERM_BP_DIRECT	positive regulation of stress fiber assembly	22	0.4	0.049	0.59
GOTERM_BP_DIRECT	regulation of erythrocyte differentiation	5	0.1	0.05	0.59
GOTERM_BP_DIRECT	negative regulation of histone H3-K9 methylation	5	0.1	0.05	0.59
GOTERM_BP_DIRECT	regulation of T cell differentiation in thymus	5	0.1	0.05	0.59
GOTERM_BP_DIRECT	ubiquitin-dependent SMAD protein catabolic process	5	0.1	0.05	0.59
GOTERM_BP_DIRECT	purine nucleobase biosynthetic process	5	0.1	0.05	0.59
GOTERM_BP_DIRECT	immature B cell differentiation	5	0.1	0.05	0.59
GOTERM_BP_DIRECT	negative regulation of histone phosphorylation	5	0.1	0.05	0.59
GOTERM_BP_DIRECT	regulation of telomere maintenance via telomerase	5	0.1	0.05	0.59
GOTERM_BP_DIRECT	regulation of transcription from RNA polymerase II promoter in response to oxidative stress	5	0.1	0.05	0.59
GOTERM_BP_DIRECT	positive regulation of transcription from RNA polymerase II promoter in response to hypoxia	5	0.1	0.05	0.59
GOTERM_BP_DIRECT	nose development	5	0.1	0.05	0.59
GOTERM_BP_DIRECT	double-strand break repair via classical nonhomologous end joining	5	0.1	0.05	0.59
GOTERM_BP_DIRECT	plus-end-directed vesicle transport along microtubule	5	0.1	0.05	0.59
GOTERM_BP_DIRECT	negative regulation of transforming growth factor beta1 production	5	0.1	0.05	0.59
GOTERM_BP_DIRECT	chorionic trophoblast cell differentiation	5	0.1	0.05	0.59
GOTERM_BP_DIRECT	regulation of DNA damage response, signal transduction by p53 class mediator	5	0.1	0.05	0.59
GOTERM_BP_DIRECT	negative regulation of cellular component movement	5	0.1	0.05	0.59
GOTERM_BP_DIRECT	negative regulation of hepatocyte apoptotic process	5	0.1	0.05	0.59
GOTERM_BP_DIRECT	mRNA transcription	5	0.1	0.05	0.59
GOTERM_BP_DIRECT	mammary gland development	11	0.2	0.05	0.59
GOTERM_BP_DIRECT	cardiac muscle cell differentiation	11	0.2	0.05	0.59
GOTERM_BP_DIRECT	DNA damage response, signal transduction by p53 class mediator resulting in cell cycle arrest	11	0.2	0.05	0.59
GOTERM_BP_DIRECT	protein neddylation	11	0.2	0.05	0.59
GOTERM_BP_DIRECT	positive regulation of dendritic spine morphogenesis	11	0.2	0.05	0.59
GOTERM_BP_DIRECT	histone H2A acetylation	11	0.2	0.05	0.59
GOTERM_BP_DIRECT	TOR signaling	11	0.2	0.05	0.59
GOTERM_BP_DIRECT	neural crest cell development	11	0.2	0.05	0.59
GOTERM_BP_DIRECT	placenta blood vessel development	7	0.1	0.05	0.59
GOTERM_BP_DIRECT	thymocyte apoptotic process	7	0.1	0.05	0.59
GOTERM_BP_DIRECT	protein folding in endoplasmic reticulum	7	0.1	0.05	0.59
GOTERM_BP_DIRECT	Rap protein signal transduction	7	0.1	0.05	0.59
GOTERM_BP_DIRECT	mitochondrial genome maintenance	7	0.1	0.05	0.59
GOTERM_BP_DIRECT	regulation of hematopoietic stem cell differentiation	7	0.1	0.05	0.59
GOTERM_BP_DIRECT	neutrophil mediated immunity	7	0.1	0.05	0.59
GOTERM_BP_DIRECT	endosomal vesicle fusion	7	0.1	0.05	0.59
GOTERM_BP_DIRECT	positive regulation of T cell cytokine production	7	0.1	0.05	0.59
GOTERM_BP_DIRECT	cardiac muscle cell myoblast differentiation	7	0.1	0.05	0.59
GOTERM_BP_DIRECT	regulation of G2/M transition of mitotic cell cycle	7	0.1	0.05	0.59
GOTERM_BP_DIRECT	sphingomyelin biosynthetic process	7	0.1	0.05	0.59
GOTERM_BP_DIRECT	ER overload response	7	0.1	0.05	0.59
GOTERM_BP_DIRECT	protein modification by small protein conjugation	7	0.1	0.05	0.59
GOTERM_BP_DIRECT	positive regulation of histone methylation	7	0.1	0.05	0.59
GOTERM_BP_DIRECT	cerebellum development	20	0.4	0.051	0.59
GOTERM_BP_DIRECT	phosphatidylinositol biosynthetic process	19	0.3	0.052	0.6
GOTERM_BP_DIRECT	monoubiquitinated histone deubiquitination	12	0.2	0.052	0.6
GOTERM_BP_DIRECT	positive regulation of exocytosis	12	0.2	0.052	0.6
GOTERM_BP_DIRECT	positive regulation of dendritic spine development	12	0.2	0.052	0.6
GOTERM_BP_DIRECT	glycolytic process	18	0.3	0.053	0.61
GOTERM_BP_DIRECT	intracellular transport	18	0.3	0.053	0.61
GOTERM_BP_DIRECT	germ cell development	18	0.3	0.053	0.61
GOTERM_BP_DIRECT	positive regulation of neuroblast proliferation	13	0.2	0.053	0.61
GOTERM_BP_DIRECT	nucleus organization	13	0.2	0.053	0.61
GOTERM_BP_DIRECT	response to cadmium ion	13	0.2	0.053	0.61
GOTERM_BP_DIRECT	cellular protein modification process	35	0.6	0.053	0.61
GOTERM_BP_DIRECT	cellular response to reactive oxygen species	16	0.3	0.054	0.61
GOTERM_BP_DIRECT	oligodendrocyte differentiation	16	0.3	0.054	0.61
GOTERM_BP_DIRECT	response to amino acid	14	0.2	0.054	0.61
GOTERM_BP_DIRECT	positive regulation of protein dephosphorylation	14	0.2	0.054	0.61
GOTERM_BP_DIRECT	maintenance of permeability of blood-brain barrier	14	0.2	0.054	0.61
GOTERM_BP_DIRECT	regulation of translational initiation	14	0.2	0.054	0.61
GOTERM_BP_DIRECT	positive regulation of apoptotic signaling pathway	14	0.2	0.054	0.61
GOTERM_BP_DIRECT	cortical actin cytoskeleton organization	14	0.2	0.054	0.61
GOTERM_BP_DIRECT	protein export from nucleus	14	0.2	0.054	0.61
GOTERM_BP_DIRECT	positive regulation of erythrocyte differentiation	15	0.3	0.054	0.61
GOTERM_BP_DIRECT	fibroblast proliferation	15	0.3	0.054	0.61
GOTERM_BP_DIRECT	adipose tissue development	15	0.3	0.054	0.61
GOTERM_BP_DIRECT	protein processing	30	0.5	0.055	0.62
GOTERM_BP_DIRECT	positive regulation of NF-kappaB transcription factor activity	54	1	0.055	0.62
GOTERM_BP_DIRECT	regulation of GTPase activity	33	0.6	0.057	0.64
GOTERM_BP_DIRECT	cytoplasmic mRNA processing body assembly	8	0.1	0.058	0.64
GOTERM_BP_DIRECT	mRNA 3'-end processing	8	0.1	0.058	0.64
GOTERM_BP_DIRECT	endosomal lumen acidification	8	0.1	0.058	0.64
GOTERM_BP_DIRECT	embryonic morphogenesis	8	0.1	0.058	0.64
GOTERM_BP_DIRECT	positive regulation of receptor recycling	8	0.1	0.058	0.64
GOTERM_BP_DIRECT	interleukin-6-mediated signaling pathway	8	0.1	0.058	0.64
GOTERM_BP_DIRECT	negative regulation of protein localization to cell surface	8	0.1	0.058	0.64
GOTERM_BP_DIRECT	regulation of stem cell population maintenance	8	0.1	0.058	0.64
GOTERM_BP_DIRECT	trophoblast giant cell differentiation	8	0.1	0.058	0.64
GOTERM_BP_DIRECT	regulation of Rac protein signal transduction	8	0.1	0.058	0.64
GOTERM_BP_DIRECT	response to inorganic substance	8	0.1	0.058	0.64
GOTERM_BP_DIRECT	regulation of DNA-dependent DNA replication initiation	8	0.1	0.058	0.64
GOTERM_BP_DIRECT	positive regulation of cellular protein catabolic process	8	0.1	0.058	0.64
GOTERM_BP_DIRECT	cellular response to interleukin-7	8	0.1	0.058	0.64
GOTERM_BP_DIRECT	hematopoietic progenitor cell differentiation	28	0.5	0.058	0.64
GOTERM_BP_DIRECT	gene expression	32	0.6	0.059	0.65
GOTERM_BP_DIRECT	protein N-linked glycosylation	21	0.4	0.06	0.67
GOTERM_BP_DIRECT	positive regulation of JNK cascade	35	0.6	0.061	0.67
GOTERM_BP_DIRECT	cell differentiation	204	3.6	0.062	0.67
GOTERM_BP_DIRECT	regulation of JNK cascade	9	0.2	0.063	0.67
GOTERM_BP_DIRECT	intra-S DNA damage checkpoint	9	0.2	0.063	0.67
GOTERM_BP_DIRECT	heparan sulfate proteoglycan biosynthetic process	9	0.2	0.063	0.67
GOTERM_BP_DIRECT	innervation	9	0.2	0.063	0.67
GOTERM_BP_DIRECT	gastrulation with mouth forming second	9	0.2	0.063	0.67
GOTERM_BP_DIRECT	response to dexamethasone	9	0.2	0.063	0.67
GOTERM_BP_DIRECT	regulation of mitophagy	9	0.2	0.063	0.67
GOTERM_BP_DIRECT	synaptic vesicle transport	9	0.2	0.063	0.67
GOTERM_BP_DIRECT	positive regulation of cartilage development	9	0.2	0.063	0.67
GOTERM_BP_DIRECT	intrinsic apoptotic signaling pathway in response to oxidative stress	9	0.2	0.063	0.67
GOTERM_BP_DIRECT	neuromuscular process controlling balance	19	0.3	0.063	0.67
GOTERM_BP_DIRECT	sequestering of triglyceride	4	0.1	0.064	0.67
GOTERM_BP_DIRECT	regulation of glycogen catabolic process	4	0.1	0.064	0.67
GOTERM_BP_DIRECT	Schwann cell development	4	0.1	0.064	0.67
GOTERM_BP_DIRECT	positive regulation of mesenchymal stem cell migration	4	0.1	0.064	0.67
GOTERM_BP_DIRECT	positive regulation of organelle organization	4	0.1	0.064	0.67
GOTERM_BP_DIRECT	tRNA N2-guanine methylation	4	0.1	0.064	0.67
GOTERM_BP_DIRECT	pyrimidine dimer repair by nucleotide-excision repair	4	0.1	0.064	0.67
GOTERM_BP_DIRECT	ATP generation from poly-ADP-D-ribose	4	0.1	0.064	0.67
GOTERM_BP_DIRECT	mesenchyme development	4	0.1	0.064	0.67
GOTERM_BP_DIRECT	establishment of meiotic spindle localization	4	0.1	0.064	0.67
GOTERM_BP_DIRECT	positive regulation of Fc-gamma receptor signaling pathway involved in phagocytosis	4	0.1	0.064	0.67
GOTERM_BP_DIRECT	regulation of transforming growth factor beta2 production	4	0.1	0.064	0.67
GOTERM_BP_DIRECT	epidermal cell fate specification	4	0.1	0.064	0.67
GOTERM_BP_DIRECT	regulation of binding	4	0.1	0.064	0.67
GOTERM_BP_DIRECT	negative regulation of adiponectin secretion	4	0.1	0.064	0.67
GOTERM_BP_DIRECT	endoplasmic reticulum tubular network membrane organization	4	0.1	0.064	0.67
GOTERM_BP_DIRECT	serine phosphorylation of STAT protein	4	0.1	0.064	0.67
GOTERM_BP_DIRECT	polar body extrusion after meiotic divisions	4	0.1	0.064	0.67
GOTERM_BP_DIRECT	positive regulation by virus of viral protein levels in host cell	4	0.1	0.064	0.67
GOTERM_BP_DIRECT	positive regulation of endoplasmic reticulum tubular network organization	4	0.1	0.064	0.67
GOTERM_BP_DIRECT	regulation of miRNA metabolic process	4	0.1	0.064	0.67
GOTERM_BP_DIRECT	regulation of secondary heart field cardioblast proliferation	4	0.1	0.064	0.67
GOTERM_BP_DIRECT	intracellular mRNA localization	4	0.1	0.064	0.67
GOTERM_BP_DIRECT	eye morphogenesis	4	0.1	0.064	0.67
GOTERM_BP_DIRECT	response to nitrosative stress	4	0.1	0.064	0.67
GOTERM_BP_DIRECT	regulation of Rap protein signal transduction	4	0.1	0.064	0.67
GOTERM_BP_DIRECT	negative regulation of plasma membrane long-chain fatty acid transport	4	0.1	0.064	0.67
GOTERM_BP_DIRECT	nuclear pore localization	4	0.1	0.064	0.67
GOTERM_BP_DIRECT	actin filament organization	47	0.8	0.064	0.67
GOTERM_BP_DIRECT	positive regulation of stem cell proliferation	17	0.3	0.066	0.68
GOTERM_BP_DIRECT	negative regulation of type I interferon-mediated signaling pathway	10	0.2	0.066	0.68
GOTERM_BP_DIRECT	response to muscle stretch	10	0.2	0.066	0.68
GOTERM_BP_DIRECT	regulation of ARF protein signal transduction	10	0.2	0.066	0.68
GOTERM_BP_DIRECT	regulation of axonogenesis	10	0.2	0.066	0.68
GOTERM_BP_DIRECT	regulation of establishment of cell polarity	10	0.2	0.066	0.68
GOTERM_BP_DIRECT	interstrand cross-link repair	16	0.3	0.067	0.68
GOTERM_BP_DIRECT	blood vessel remodeling	16	0.3	0.067	0.68
GOTERM_BP_DIRECT	positive regulation of cell cycle	16	0.3	0.067	0.68
GOTERM_BP_DIRECT	negative regulation of extrinsic apoptotic signaling pathway in absence of ligand	16	0.3	0.067	0.68
GOTERM_BP_DIRECT	glomerular visceral epithelial cell development	6	0.1	0.068	0.68
GOTERM_BP_DIRECT	negative regulation of biomineral tissue development	6	0.1	0.068	0.68
GOTERM_BP_DIRECT	rescue of stalled ribosome	6	0.1	0.068	0.68
GOTERM_BP_DIRECT	negative regulation of cardiac muscle hypertrophy in response to stress	6	0.1	0.068	0.68
GOTERM_BP_DIRECT	maintenance of cell polarity	6	0.1	0.068	0.68
GOTERM_BP_DIRECT	reciprocal DNA recombination	6	0.1	0.068	0.68
GOTERM_BP_DIRECT	positive regulation of ryanodine-sensitive calcium-release channel activity	6	0.1	0.068	0.68
GOTERM_BP_DIRECT	histone H3-K4 monomethylation	6	0.1	0.068	0.68
GOTERM_BP_DIRECT	pericardium development	6	0.1	0.068	0.68
GOTERM_BP_DIRECT	negative regulation of erythrocyte differentiation	6	0.1	0.068	0.68
GOTERM_BP_DIRECT	regulation of establishment of endothelial barrier	6	0.1	0.068	0.68
GOTERM_BP_DIRECT	regulation of nitric-oxide synthase activity	6	0.1	0.068	0.68
GOTERM_BP_DIRECT	cellular response to oxygen-glucose deprivation	6	0.1	0.068	0.68
GOTERM_BP_DIRECT	L-serine transport	6	0.1	0.068	0.68
GOTERM_BP_DIRECT	positive regulation of tau-protein kinase activity	6	0.1	0.068	0.68
GOTERM_BP_DIRECT	negative regulation of organ growth	6	0.1	0.068	0.68
GOTERM_BP_DIRECT	lung epithelial cell differentiation	6	0.1	0.068	0.68
GOTERM_BP_DIRECT	Notch receptor processing	6	0.1	0.068	0.68
GOTERM_BP_DIRECT	coronary artery morphogenesis	6	0.1	0.068	0.68
GOTERM_BP_DIRECT	peripheral nervous system myelin maintenance	6	0.1	0.068	0.68
GOTERM_BP_DIRECT	negative regulation of retrograde protein transport, ER to cytosol	6	0.1	0.068	0.68
GOTERM_BP_DIRECT	vacuolar acidification	11	0.2	0.068	0.68
GOTERM_BP_DIRECT	protein N-linked glycosylation via asparagine	11	0.2	0.068	0.68
GOTERM_BP_DIRECT	protein palmitoylation	11	0.2	0.068	0.68
GOTERM_BP_DIRECT	megakaryocyte development	11	0.2	0.068	0.68
GOTERM_BP_DIRECT	regulation of endocytosis	15	0.3	0.068	0.68
GOTERM_BP_DIRECT	regulation of MAPK cascade	15	0.3	0.068	0.68
GOTERM_BP_DIRECT	negative regulation of mitotic cell cycle	15	0.3	0.068	0.68
GOTERM_BP_DIRECT	positive regulation of TOR signaling	15	0.3	0.068	0.68
GOTERM_BP_DIRECT	transcription elongation from RNA polymerase II promoter	15	0.3	0.068	0.68
GOTERM_BP_DIRECT	tissue development	15	0.3	0.068	0.68
GOTERM_BP_DIRECT	replication fork processing	15	0.3	0.068	0.68
GOTERM_BP_DIRECT	Rho protein signal transduction	23	0.4	0.068	0.68
GOTERM_BP_DIRECT	cellular response to cAMP	23	0.4	0.068	0.68
GOTERM_BP_DIRECT	odontogenesis of dentin-containing tooth	23	0.4	0.068	0.68
GOTERM_BP_DIRECT	phosphatidylinositol dephosphorylation	14	0.2	0.069	0.68
GOTERM_BP_DIRECT	muscle cell cellular homeostasis	12	0.2	0.069	0.68
GOTERM_BP_DIRECT	B cell homeostasis	12	0.2	0.069	0.68
GOTERM_BP_DIRECT	clathrin-dependent endocytosis	12	0.2	0.069	0.68
GOTERM_BP_DIRECT	intrinsic apoptotic signaling pathway by p53 class mediator	12	0.2	0.069	0.68
GOTERM_BP_DIRECT	regulation of synapse organization	12	0.2	0.069	0.68
GOTERM_BP_DIRECT	negative regulation of JNK cascade	13	0.2	0.069	0.68
GOTERM_BP_DIRECT	response to organic substance	13	0.2	0.069	0.68
GOTERM_BP_DIRECT	phosphorylation	44	0.8	0.071	0.7
GOTERM_BP_DIRECT	bone mineralization	21	0.4	0.072	0.71
GOTERM_BP_DIRECT	myelination	20	0.4	0.074	0.73
GOTERM_BP_DIRECT	skeletal muscle cell differentiation	19	0.3	0.077	0.75
GOTERM_BP_DIRECT	nucleosome assembly	42	0.7	0.077	0.75
GOTERM_BP_DIRECT	anoikis	7	0.1	0.078	0.76
GOTERM_BP_DIRECT	positive regulation of extrinsic apoptotic signaling pathway in absence of ligand	7	0.1	0.078	0.76
GOTERM_BP_DIRECT	regulation of BMP signaling pathway	7	0.1	0.078	0.76
GOTERM_BP_DIRECT	chromatin-mediated maintenance of transcription	7	0.1	0.078	0.76
GOTERM_BP_DIRECT	protein auto-ADP-ribosylation	7	0.1	0.078	0.76
GOTERM_BP_DIRECT	NADP metabolic process	7	0.1	0.078	0.76
GOTERM_BP_DIRECT	positive regulation of transcription from RNA polymerase II promoter in response to endoplasmic reticulum stress	7	0.1	0.078	0.76
GOTERM_BP_DIRECT	atrioventricular valve morphogenesis	7	0.1	0.078	0.76
GOTERM_BP_DIRECT	positive regulation of astrocyte differentiation	7	0.1	0.078	0.76
GOTERM_BP_DIRECT	establishment of endothelial intestinal barrier	7	0.1	0.078	0.76
GOTERM_BP_DIRECT	cellular response to X-ray	7	0.1	0.078	0.76
GOTERM_BP_DIRECT	response to hormone	18	0.3	0.079	0.76
GOTERM_BP_DIRECT	hair follicle development	17	0.3	0.081	0.78
GOTERM_BP_DIRECT	vesicle fusion	17	0.3	0.081	0.78
GOTERM_BP_DIRECT	positive regulation of interferon-beta production	17	0.3	0.081	0.78
GOTERM_BP_DIRECT	cellular response to retinoic acid	27	0.5	0.081	0.78
GOTERM_BP_DIRECT	positive regulation of Wnt signaling pathway	16	0.3	0.083	0.79
GOTERM_BP_DIRECT	T cell differentiation in thymus	16	0.3	0.083	0.79
GOTERM_BP_DIRECT	placenta development	16	0.3	0.083	0.79
GOTERM_BP_DIRECT	dendrite morphogenesis	16	0.3	0.083	0.79
GOTERM_BP_DIRECT	negative regulation of endothelial cell proliferation	16	0.3	0.083	0.79
GOTERM_BP_DIRECT	embryonic limb morphogenesis	16	0.3	0.083	0.79
GOTERM_BP_DIRECT	DNA-templated transcription, initiation	16	0.3	0.083	0.79
GOTERM_BP_DIRECT	negative regulation of G1/S transition of mitotic cell cycle	22	0.4	0.083	0.79
GOTERM_BP_DIRECT	regulation of signal transduction	22	0.4	0.083	0.79
GOTERM_BP_DIRECT	cranial skeletal system development	8	0.1	0.084	0.79
GOTERM_BP_DIRECT	cellular response to angiotensin	8	0.1	0.084	0.79
GOTERM_BP_DIRECT	unsaturated fatty acid biosynthetic process	8	0.1	0.084	0.79
GOTERM_BP_DIRECT	positive regulation of ossification	8	0.1	0.084	0.79
GOTERM_BP_DIRECT	regulation of DNA damage checkpoint	8	0.1	0.084	0.79
GOTERM_BP_DIRECT	negative regulation of androgen receptor signaling pathway	8	0.1	0.084	0.79
GOTERM_BP_DIRECT	protein heterotetramerization	8	0.1	0.084	0.79
GOTERM_BP_DIRECT	regulation of proteasomal ubiquitin-dependent protein catabolic process	8	0.1	0.084	0.79
GOTERM_BP_DIRECT	positive regulation of MHC class II biosynthetic process	8	0.1	0.084	0.79
GOTERM_BP_DIRECT	negative regulation of cilium assembly	8	0.1	0.084	0.79
GOTERM_BP_DIRECT	endothelial cell differentiation	8	0.1	0.084	0.79
GOTERM_BP_DIRECT	regulation of protein neddylation	8	0.1	0.084	0.79
GOTERM_BP_DIRECT	cellular response to peptide	8	0.1	0.084	0.79
GOTERM_BP_DIRECT	negative regulation of oxidative stress-induced neuron death	8	0.1	0.084	0.79
GOTERM_BP_DIRECT	actin filament bundle assembly	15	0.3	0.085	0.79
GOTERM_BP_DIRECT	positive regulation of neurogenesis	14	0.2	0.086	0.8
GOTERM_BP_DIRECT	positive regulation of cardiac muscle cell proliferation	14	0.2	0.086	0.8
GOTERM_BP_DIRECT	cellular response to fibroblast growth factor stimulus	14	0.2	0.086	0.8
GOTERM_BP_DIRECT	inositol phosphate dephosphorylation	9	0.2	0.087	0.8
GOTERM_BP_DIRECT	histone H3-K14 acetylation	9	0.2	0.087	0.8
GOTERM_BP_DIRECT	RNA methylation	9	0.2	0.087	0.8
GOTERM_BP_DIRECT	basement membrane organization	9	0.2	0.087	0.8
GOTERM_BP_DIRECT	positive regulation of regulatory T cell differentiation	9	0.2	0.087	0.8
GOTERM_BP_DIRECT	sterol biosynthetic process	9	0.2	0.087	0.8
GOTERM_BP_DIRECT	response to steroid hormone	9	0.2	0.087	0.8
GOTERM_BP_DIRECT	positive regulation of reactive oxygen species biosynthetic process	9	0.2	0.087	0.8
GOTERM_BP_DIRECT	negative regulation of protein ubiquitination involved in ubiquitin-dependent protein catabolic process	9	0.2	0.087	0.8
GOTERM_BP_DIRECT	camera-type eye morphogenesis	9	0.2	0.087	0.8
GOTERM_BP_DIRECT	protein localization to pre-autophagosomal structure	9	0.2	0.087	0.8
GOTERM_BP_DIRECT	regulation of protein ubiquitination	9	0.2	0.087	0.8
GOTERM_BP_DIRECT	regulation of phosphatidylinositol 3-kinase activity	9	0.2	0.087	0.8
GOTERM_BP_DIRECT	regulation of protein catabolic process	9	0.2	0.087	0.8
GOTERM_BP_DIRECT	mesoderm development	13	0.2	0.088	0.8
GOTERM_BP_DIRECT	regulation of neuron differentiation	13	0.2	0.088	0.8
GOTERM_BP_DIRECT	vascular endothelial growth factor receptor signaling pathway	13	0.2	0.088	0.8
GOTERM_BP_DIRECT	positive regulation of protein secretion	20	0.4	0.089	0.8
GOTERM_BP_DIRECT	regulation of cytoskeleton organization	12	0.2	0.089	0.8
GOTERM_BP_DIRECT	cellular response to platelet-derived growth factor stimulus	12	0.2	0.089	0.8
GOTERM_BP_DIRECT	translational elongation	10	0.2	0.089	0.8
GOTERM_BP_DIRECT	lysosomal lumen acidification	10	0.2	0.089	0.8
GOTERM_BP_DIRECT	negative regulation of axon extension	10	0.2	0.089	0.8
GOTERM_BP_DIRECT	determination of adult lifespan	10	0.2	0.089	0.8
GOTERM_BP_DIRECT	negative regulation of telomere maintenance via telomerase	10	0.2	0.089	0.8
GOTERM_BP_DIRECT	positive regulation of mitochondrial fission	10	0.2	0.089	0.8
GOTERM_BP_DIRECT	mitochondrion morphogenesis	10	0.2	0.089	0.8
GOTERM_BP_DIRECT	amyloid fibril formation	10	0.2	0.089	0.8
GOTERM_BP_DIRECT	aorta development	11	0.2	0.089	0.8
GOTERM_BP_DIRECT	negative regulation of Rho protein signal transduction	11	0.2	0.089	0.8
GOTERM_BP_DIRECT	regulation of mitotic spindle assembly	11	0.2	0.089	0.8
GOTERM_BP_DIRECT	chromosome organization	11	0.2	0.089	0.8
GOTERM_BP_DIRECT	keratinocyte proliferation	11	0.2	0.089	0.8
GOTERM_BP_DIRECT	positive regulation of osteoclast differentiation	11	0.2	0.089	0.8
GOTERM_BP_DIRECT	negative regulation of chondrocyte differentiation	11	0.2	0.089	0.8
GOTERM_BP_DIRECT	response to fatty acid	11	0.2	0.089	0.8
GOTERM_BP_DIRECT	protein targeting to lysosome	11	0.2	0.089	0.8
GOTERM_BP_DIRECT	microtubule nucleation	11	0.2	0.089	0.8
GOTERM_BP_DIRECT	positive regulation of T cell proliferation	24	0.4	0.09	0.8
GOTERM_BP_DIRECT	cellular response to xenobiotic stimulus	24	0.4	0.09	0.8
GOTERM_BP_DIRECT	signal transduction	366	6.5	0.092	0.8
GOTERM_BP_DIRECT	histone H3-K4 dimethylation	5	0.1	0.092	0.8
GOTERM_BP_DIRECT	RNA polyadenylation	5	0.1	0.092	0.8
GOTERM_BP_DIRECT	T-helper 17 cell lineage commitment	5	0.1	0.092	0.8
GOTERM_BP_DIRECT	response to follicle-stimulating hormone	5	0.1	0.092	0.8
GOTERM_BP_DIRECT	negative regulation of Schwann cell proliferation	5	0.1	0.092	0.8
GOTERM_BP_DIRECT	positive regulation of cellular protein localization	5	0.1	0.092	0.8
GOTERM_BP_DIRECT	positive regulation of histone H3-K9 methylation	5	0.1	0.092	0.8
GOTERM_BP_DIRECT	internal peptidyl-lysine acetylation	5	0.1	0.092	0.8
GOTERM_BP_DIRECT	vascular endothelial growth factor production	5	0.1	0.092	0.8
GOTERM_BP_DIRECT	stem cell development	5	0.1	0.092	0.8
GOTERM_BP_DIRECT	regulation of Rab protein signal transduction	5	0.1	0.092	0.8
GOTERM_BP_DIRECT	regulation of hippo signaling	5	0.1	0.092	0.8
GOTERM_BP_DIRECT	response to follicle-stimulating hormone	5	0.1	0.092	0.8
GOTERM_BP_DIRECT	response to angiotensin	5	0.1	0.092	0.8
GOTERM_BP_DIRECT	regulation of cholesterol transport	5	0.1	0.092	0.8
GOTERM_BP_DIRECT	regulation of translational termination	5	0.1	0.092	0.8
GOTERM_BP_DIRECT	histone H3-K4 dimethylation	5	0.1	0.092	0.8
GOTERM_BP_DIRECT	negative regulation of Schwann cell proliferation	5	0.1	0.092	0.8
GOTERM_BP_DIRECT	monoubiquitinated protein deubiquitination	5	0.1	0.092	0.8
GOTERM_BP_DIRECT	L-serine biosynthetic process	5	0.1	0.092	0.8
GOTERM_BP_DIRECT	protein localization to chromosome, centromeric region	5	0.1	0.092	0.8
GOTERM_BP_DIRECT	positive regulation of mRNA 3'-end processing	5	0.1	0.092	0.8
GOTERM_BP_DIRECT	T-helper 17 cell lineage commitment	5	0.1	0.092	0.8
GOTERM_BP_DIRECT	heart valve morphogenesis	5	0.1	0.092	0.8
GOTERM_BP_DIRECT	positive regulation of response to cytokine stimulus	5	0.1	0.092	0.8
GOTERM_BP_DIRECT	de novo' pyrimidine nucleobase biosynthetic process	5	0.1	0.092	0.8
GOTERM_BP_DIRECT	positive regulation of cellular protein localization	5	0.1	0.092	0.8
GOTERM_BP_DIRECT	methylation-dependent chromatin silencing	5	0.1	0.092	0.8
GOTERM_BP_DIRECT	SMAD protein complex assembly	5	0.1	0.092	0.8
GOTERM_BP_DIRECT	positive regulation of transcription of Notch receptor target	5	0.1	0.092	0.8
GOTERM_BP_DIRECT	apical junction assembly	5	0.1	0.092	0.8
GOTERM_BP_DIRECT	ameboidal-type cell migration	5	0.1	0.092	0.8
GOTERM_BP_DIRECT	meiotic chromosome condensation	5	0.1	0.092	0.8
GOTERM_BP_DIRECT	leukotriene transport	5	0.1	0.092	0.8
GOTERM_BP_DIRECT	response to calcium ion	23	0.4	0.094	0.81
GOTERM_BP_DIRECT	protein glycosylation	45	0.8	0.094	0.81
GOTERM_BP_DIRECT	cellular response to amino acid starvation	18	0.3	0.094	0.82
GOTERM_BP_DIRECT	cellular response to lipopolysaccharide	62	1.1	0.096	0.83
GOTERM_BP_DIRECT	response to estrogen	26	0.5	0.097	0.84
GOTERM_BP_DIRECT	cell redox homeostasis	17	0.3	0.097	0.84
GOTERM_CC_DIRECT	nucleus	2289	40.4	2.5e-129	1.8e-126
GOTERM_CC_DIRECT	cytosol	2140	37.8	1.4e-124	6.6e-122
GOTERM_CC_DIRECT	membrane	1049	18.5	2.1e-65	7.4e-63
GOTERM_CC_DIRECT	cytoplasm	1931	34.1	3.2e-55	9e-53
GOTERM_CC_DIRECT	focal adhesion	220	3.9	1.4e-28	3.3e-26
GOTERM_CC_DIRECT	macromolecular complex	307	5.4	3.9e-23	7.8e-21
GOTERM_CC_DIRECT	chromatin	418	7.4	4.3e-21	7.6e-19
GOTERM_CC_DIRECT	extracellular exosome	771	13.6	1.4e-19	2.3e-17
GOTERM_CC_DIRECT	Golgi apparatus	430	7.6	8.3e-19	1.2e-16
GOTERM_CC_DIRECT	nuclear speck	200	3.5	1e-18	1.3e-16
GOTERM_CC_DIRECT	centrosome	238	4.2	6.1e-18	7.2e-16
GOTERM_CC_DIRECT	endoplasmic reticulum membrane	403	7.1	1.2e-17	1.3e-15
GOTERM_CC_DIRECT	nuclear body	162	2.9	6.5e-17	6.5e-15
GOTERM_CC_DIRECT	nuclear membrane	124	2.2	5.6e-16	5.3e-14
GOTERM_CC_DIRECT	Golgi membrane	264	4.7	3.5e-15	3.1e-13
GOTERM_CC_DIRECT	endoplasmic reticulum	416	7.3	8.7e-14	7.2e-12
GOTERM_CC_DIRECT	cytoplasmic stress granule	57	1	1.8e-13	1.4e-11
GOTERM_CC_DIRECT	chromosome	119	2.1	1.5e-11	1.1e-09
GOTERM_CC_DIRECT	perinuclear region of cytoplasm	287	5.1	1.7e-11	1.2e-09
GOTERM_CC_DIRECT	early endosome	137	2.4	2e-11	1.4e-09
GOTERM_CC_DIRECT	intracellular membrane-bounded organelle	355	6.3	2.1e-11	1.4e-09
GOTERM_CC_DIRECT	kinetochore	82	1.4	2.4e-11	1.5e-09
GOTERM_CC_DIRECT	chromosome, telomeric region	88	1.6	2.6e-11	1.5e-09
GOTERM_CC_DIRECT	ribonucleoprotein complex	84	1.5	3.3e-11	1.8e-09
GOTERM_CC_DIRECT	spindle	78	1.4	4.3e-11	2.3e-09
GOTERM_CC_DIRECT	nuclear envelope	95	1.7	6.1e-11	3.2e-09
GOTERM_CC_DIRECT	fibrillar center	77	1.4	2e-10	9.9e-09
GOTERM_CC_DIRECT	melanosome	58	1	6.6e-10	3.2e-08
GOTERM_CC_DIRECT	RNA polymerase II transcription factor complex	65	1.1	7.6e-10	3.6e-08
GOTERM_CC_DIRECT	nuclear matrix	68	1.2	8.5e-10	3.9e-08
GOTERM_CC_DIRECT	mitochondrion	482	8.5	1.7e-09	7.5e-08
GOTERM_CC_DIRECT	PML body	56	1	2.8e-08	1.2e-06
GOTERM_CC_DIRECT	ubiquitin ligase complex	59	1	4.5e-08	1.9e-06
GOTERM_CC_DIRECT	midbody	84	1.5	6.7e-08	2.7e-06
GOTERM_CC_DIRECT	transcriptional repressor complex	38	0.7	8e-08	3.1e-06
GOTERM_CC_DIRECT	transcription factor complex	99	1.7	1.4e-07	5.2e-06
GOTERM_CC_DIRECT	P-body	51	0.9	1.5e-07	5.7e-06
GOTERM_CC_DIRECT	lamellipodium	85	1.5	2.2e-07	7.8e-06
GOTERM_CC_DIRECT	adherens junction	79	1.4	2.3e-07	8.1e-06
GOTERM_CC_DIRECT	lysosomal membrane	145	2.6	2.5e-07	8.6e-06
GOTERM_CC_DIRECT	mitochondrial outer membrane	83	1.5	7.7e-07	2.6e-05
GOTERM_CC_DIRECT	heterochromatin	30	0.5	8.9e-07	2.9e-05
GOTERM_CC_DIRECT	cytoplasmic ribonucleoprotein granule	44	0.8	9.4e-07	3e-05
GOTERM_CC_DIRECT	chromosome, centromeric region	36	0.6	1.1e-06	3.5e-05
GOTERM_CC_DIRECT	spliceosomal complex	59	1	1.2e-06	3.6e-05
GOTERM_CC_DIRECT	endomembrane system	65	1.1	1.2e-06	3.7e-05
GOTERM_CC_DIRECT	cyclin-dependent protein kinase holoenzyme complex	26	0.5	2.1e-06	6.1e-05
GOTERM_CC_DIRECT	mitotic spindle pole	25	0.4	2.5e-06	7.3e-05
GOTERM_CC_DIRECT	cell cortex	72	1.3	2.9e-06	8.1e-05
GOTERM_CC_DIRECT	endosome	122	2.2	4.2e-06	0.00012
GOTERM_CC_DIRECT	microtubule organizing center	70	1.2	4.6e-06	0.00013
GOTERM_CC_DIRECT	ficolin-1-rich granule lumen	57	1	6.7e-06	0.00018
GOTERM_CC_DIRECT	ruffle membrane	48	0.8	7e-06	0.00018
GOTERM_CC_DIRECT	actin cytoskeleton	102	1.8	7.3e-06	0.00019
GOTERM_CC_DIRECT	endosome membrane	100	1.8	9.1e-06	0.00023
GOTERM_CC_DIRECT	ruffle	48	0.8	1.4e-05	0.00034
GOTERM_CC_DIRECT	endoplasmic reticulum-Golgi intermediate compartment	40	0.7	1.9e-05	0.00047
GOTERM_CC_DIRECT	microtubule cytoskeleton	80	1.4	2.6e-05	0.00061
GOTERM_CC_DIRECT	endoplasmic reticulum tubular network	14	0.2	2.6e-05	0.00061
GOTERM_CC_DIRECT	spindle pole	57	1	2.8e-05	0.00065
GOTERM_CC_DIRECT	replication fork	19	0.3	3.3e-05	0.00075
GOTERM_CC_DIRECT	cleavage furrow	30	0.5	3.5e-05	0.00079
GOTERM_CC_DIRECT	azurophil granule membrane	31	0.5	4.2e-05	0.00092
GOTERM_CC_DIRECT	mitotic spindle	60	1.1	5e-05	0.0011
GOTERM_CC_DIRECT	growth cone	63	1.1	5.1e-05	0.0011
GOTERM_CC_DIRECT	microtubule	120	2.1	5.3e-05	0.0011
GOTERM_CC_DIRECT	Flemming body	22	0.4	6e-05	0.0012
GOTERM_CC_DIRECT	pericentric heterochromatin	19	0.3	6.5e-05	0.0013
GOTERM_CC_DIRECT	endoplasmic reticulum lumen	113	2	7.7e-05	0.0015
GOTERM_CC_DIRECT	histone methyltransferase complex	17	0.3	9.9e-05	0.002
GOTERM_CC_DIRECT	recycling endosome membrane	46	0.8	0.0001	0.002
GOTERM_CC_DIRECT	cytoskeleton	183	3.2	0.00016	0.0031
GOTERM_CC_DIRECT	trans-Golgi network	75	1.3	0.00017	0.0032
GOTERM_CC_DIRECT	cell junction	88	1.6	0.00018	0.0034
GOTERM_CC_DIRECT	spindle microtubule	24	0.4	0.00026	0.0049
GOTERM_CC_DIRECT	histone acetyltransferase complex	18	0.3	0.00028	0.0052
GOTERM_CC_DIRECT	transport vesicle	44	0.8	0.00029	0.0053
GOTERM_CC_DIRECT	Sin3 complex	15	0.3	0.0003	0.0053
GOTERM_CC_DIRECT	postsynaptic density	98	1.7	0.0003	0.0053
GOTERM_CC_DIRECT	late endosome	60	1.1	0.00031	0.0053
GOTERM_CC_DIRECT	cell leading edge	28	0.5	0.00031	0.0053
GOTERM_CC_DIRECT	phagocytic vesicle	33	0.6	0.00033	0.0057
GOTERM_CC_DIRECT	catalytic step 2 spliceosome	40	0.7	0.00034	0.0058
GOTERM_CC_DIRECT	condensed chromosome	17	0.3	0.00036	0.0059
GOTERM_CC_DIRECT	eukaryotic 43S preinitiation complex	13	0.2	0.00044	0.0072
GOTERM_CC_DIRECT	SWI/SNF complex	18	0.3	0.00049	0.0079
GOTERM_CC_DIRECT	eukaryotic translation initiation factor 3 complex	12	0.2	0.00052	0.0083
GOTERM_CC_DIRECT	eukaryotic 48S preinitiation complex	12	0.2	0.00052	0.0083
GOTERM_CC_DIRECT	npBAF complex	11	0.2	0.0006	0.0094
GOTERM_CC_DIRECT	protein-DNA complex	24	0.4	0.00061	0.0094
GOTERM_CC_DIRECT	recycling endosome	54	1	0.00061	0.0094
GOTERM_CC_DIRECT	site of DNA damage	18	0.3	0.00081	0.012
GOTERM_CC_DIRECT	autophagosome	34	0.6	0.00087	0.013
GOTERM_CC_DIRECT	cytoplasmic microtubule	28	0.5	0.00088	0.013
GOTERM_CC_DIRECT	neuronal cell body	138	2.4	0.00094	0.014
GOTERM_CC_DIRECT	axon cytoplasm	30	0.5	0.00099	0.014
GOTERM_CC_DIRECT	cell-cell junction	72	1.3	0.001	0.015
GOTERM_CC_DIRECT	early endosome membrane	70	1.2	0.0011	0.016
GOTERM_CC_DIRECT	ER to Golgi transport vesicle membrane	27	0.5	0.0011	0.016
GOTERM_CC_DIRECT	endoplasmic reticulum-Golgi intermediate compartment membrane	35	0.6	0.0012	0.016
GOTERM_CC_DIRECT	basement membrane	40	0.7	0.0013	0.017
GOTERM_CC_DIRECT	RSC complex	11	0.2	0.0014	0.019
GOTERM_CC_DIRECT	CCR4-NOT complex	11	0.2	0.0014	0.019
GOTERM_CC_DIRECT	axon	123	2.2	0.0015	0.02
GOTERM_CC_DIRECT	cytosolic ribosome	34	0.6	0.0015	0.02
GOTERM_CC_DIRECT	site of double-strand break	34	0.6	0.0015	0.02
GOTERM_CC_DIRECT	microtubule associated complex	19	0.3	0.0015	0.02
GOTERM_CC_DIRECT	cytoplasmic vesicle	112	2	0.0016	0.02
GOTERM_CC_DIRECT	Cul4A-RING E3 ubiquitin ligase complex	10	0.2	0.0016	0.021
GOTERM_CC_DIRECT	lysosome	107	1.9	0.0017	0.021
GOTERM_CC_DIRECT	euchromatin	29	0.5	0.0017	0.022
GOTERM_CC_DIRECT	glutamatergic synapse	126	2.2	0.0018	0.023
GOTERM_CC_DIRECT	cell cortex region	9	0.2	0.0019	0.023
GOTERM_CC_DIRECT	COPI-coated vesicle membrane	7	0.1	0.0019	0.024
GOTERM_CC_DIRECT	nuclear pore	39	0.7	0.002	0.024
GOTERM_CC_DIRECT	polysomal ribosome	18	0.3	0.002	0.025
GOTERM_CC_DIRECT	actin filament	39	0.7	0.0025	0.03
GOTERM_CC_DIRECT	ER to Golgi transport vesicle	21	0.4	0.0029	0.034
GOTERM_CC_DIRECT	PcG protein complex	13	0.2	0.003	0.036
GOTERM_CC_DIRECT	integral component of endoplasmic reticulum membrane	50	0.9	0.0031	0.036
GOTERM_CC_DIRECT	condensed nuclear chromosome	19	0.3	0.0034	0.04
GOTERM_CC_DIRECT	mitotic spindle midzone	10	0.2	0.0035	0.04
GOTERM_CC_DIRECT	XY body	10	0.2	0.0035	0.04
GOTERM_CC_DIRECT	cytosolic large ribosomal subunit	27	0.5	0.0038	0.043
GOTERM_CC_DIRECT	protein phosphatase type 1 complex	12	0.2	0.0039	0.044
GOTERM_CC_DIRECT	clathrin-coated vesicle	30	0.5	0.004	0.044
GOTERM_CC_DIRECT	histone deacetylase complex	22	0.4	0.0043	0.047
GOTERM_CC_DIRECT	aminoacyl-tRNA synthetase multienzyme complex	9	0.2	0.0043	0.047
GOTERM_CC_DIRECT	beta-catenin destruction complex	9	0.2	0.0043	0.047
GOTERM_CC_DIRECT	specific granule membrane	37	0.7	0.0049	0.053
GOTERM_CC_DIRECT	phosphatidylinositol 3-kinase complex	13	0.2	0.0051	0.054
GOTERM_CC_DIRECT	lateral plasma membrane	31	0.5	0.0051	0.054
GOTERM_CC_DIRECT	chromatin silencing complex	8	0.1	0.0052	0.055
GOTERM_CC_DIRECT	podosome	16	0.3	0.0053	0.055
GOTERM_CC_DIRECT	axonal growth cone	17	0.3	0.0059	0.061
GOTERM_CC_DIRECT	SMAD protein complex	7	0.1	0.006	0.061
GOTERM_CC_DIRECT	ATPase complex	7	0.1	0.006	0.061
GOTERM_CC_DIRECT	RISC-loading complex	7	0.1	0.006	0.061
GOTERM_CC_DIRECT	postsynapse	45	0.8	0.0061	0.061
GOTERM_CC_DIRECT	nuclear inner membrane	24	0.4	0.0062	0.062
GOTERM_CC_DIRECT	caveola	32	0.6	0.0064	0.063
GOTERM_CC_DIRECT	polysome	18	0.3	0.0064	0.063
GOTERM_CC_DIRECT	membrane raft	86	1.5	0.0066	0.064
GOTERM_CC_DIRECT	COPII vesicle coat	10	0.2	0.0066	0.064
GOTERM_CC_DIRECT	PRC1 complex	10	0.2	0.0066	0.064
GOTERM_CC_DIRECT	secretory granule lumen	44	0.8	0.0074	0.071
GOTERM_CC_DIRECT	mitochondrial intermembrane space	36	0.6	0.0075	0.071
GOTERM_CC_DIRECT	basal plasma membrane	23	0.4	0.0079	0.075
GOTERM_CC_DIRECT	nuclear chromosome	24	0.4	0.0081	0.076
GOTERM_CC_DIRECT	chromocenter	9	0.2	0.0086	0.08
GOTERM_CC_DIRECT	nuclear inclusion body	9	0.2	0.0086	0.08
GOTERM_CC_DIRECT	vesicle	62	1.1	0.0087	0.08
GOTERM_CC_DIRECT	trans-Golgi network transport vesicle	11	0.2	0.0088	0.081
GOTERM_CC_DIRECT	clathrin-coated endocytic vesicle	14	0.2	0.0092	0.084
GOTERM_CC_DIRECT	basolateral plasma membrane	81	1.4	0.01	0.091
GOTERM_CC_DIRECT	intercalated disc	22	0.4	0.01	0.092
GOTERM_CC_DIRECT	centriolar satellite	44	0.8	0.01	0.092
GOTERM_CC_DIRECT	centriole	57	1	0.01	0.092
GOTERM_CC_DIRECT	clathrin-coated pit	26	0.5	0.01	0.092
GOTERM_CC_DIRECT	transcription elongation factor complex	12	0.2	0.011	0.094
GOTERM_CC_DIRECT	nucleotide-activated protein kinase complex	8	0.1	0.011	0.096
GOTERM_CC_DIRECT	nBAF complex	10	0.2	0.012	0.1
GOTERM_CC_DIRECT	MLL1 complex	17	0.3	0.012	0.1
GOTERM_CC_DIRECT	pre-autophagosomal structure	15	0.3	0.015	0.12
GOTERM_CC_DIRECT	brahma complex	9	0.2	0.015	0.13
GOTERM_CC_DIRECT	lamellipodium membrane	12	0.2	0.016	0.14
GOTERM_CC_DIRECT	small-subunit processome	18	0.3	0.016	0.14
GOTERM_CC_DIRECT	mediator complex	19	0.3	0.017	0.14
GOTERM_CC_DIRECT	autophagosome membrane	22	0.4	0.017	0.14
GOTERM_CC_DIRECT	mitochondrial matrix	124	2.2	0.017	0.14
GOTERM_CC_DIRECT	pre-snoRNP complex	6	0.1	0.017	0.14
GOTERM_CC_DIRECT	PTW/PP1 phosphatase complex	6	0.1	0.017	0.14
GOTERM_CC_DIRECT	platelet alpha granule membrane	10	0.2	0.019	0.15
GOTERM_CC_DIRECT	apical dendrite	10	0.2	0.019	0.15
GOTERM_CC_DIRECT	stress fiber	29	0.5	0.019	0.15
GOTERM_CC_DIRECT	clathrin-coated endocytic vesicle membrane	28	0.5	0.019	0.15
GOTERM_CC_DIRECT	perichromatin fibrils	5	0.1	0.02	0.15
GOTERM_CC_DIRECT	commitment complex	5	0.1	0.02	0.15
GOTERM_CC_DIRECT	Cul4B-RING E3 ubiquitin ligase complex	5	0.1	0.02	0.15
GOTERM_CC_DIRECT	transcription factor AP-1 complex	5	0.1	0.02	0.15
GOTERM_CC_DIRECT	sex chromatin	5	0.1	0.02	0.15
GOTERM_CC_DIRECT	TRAMP complex	5	0.1	0.02	0.15
GOTERM_CC_DIRECT	interchromatin granule	5	0.1	0.02	0.15
GOTERM_CC_DIRECT	endoplasmic reticulum tubular network membrane	5	0.1	0.02	0.15
GOTERM_CC_DIRECT	mitotic spindle astral microtubule	5	0.1	0.02	0.15
GOTERM_CC_DIRECT	endocytic vesicle	27	0.5	0.02	0.15
GOTERM_CC_DIRECT	ESC/E(Z) complex	8	0.1	0.02	0.15
GOTERM_CC_DIRECT	trans-Golgi network membrane	38	0.7	0.021	0.15
GOTERM_CC_DIRECT	endoplasmic reticulum exit site	16	0.3	0.021	0.16
GOTERM_CC_DIRECT	cell surface	194	3.4	0.021	0.16
GOTERM_CC_DIRECT	small nuclear ribonucleoprotein complex	9	0.2	0.025	0.19
GOTERM_CC_DIRECT	nuclear periphery	9	0.2	0.025	0.19
GOTERM_CC_DIRECT	filopodium	31	0.5	0.026	0.19
GOTERM_CC_DIRECT	U2 snRNP	14	0.2	0.027	0.19
GOTERM_CC_DIRECT	fascia adherens	7	0.1	0.027	0.19
GOTERM_CC_DIRECT	dendrite cytoplasm	16	0.3	0.028	0.2
GOTERM_CC_DIRECT	mitochondrial proton-transporting ATP synthase complex	11	0.2	0.032	0.23
GOTERM_CC_DIRECT	cell-cell contact zone	12	0.2	0.034	0.24
GOTERM_CC_DIRECT	tertiary granule membrane	28	0.5	0.034	0.24
GOTERM_CC_DIRECT	microvillus	28	0.5	0.034	0.24
GOTERM_CC_DIRECT	actomyosin	8	0.1	0.034	0.24
GOTERM_CC_DIRECT	DNA repair complex	8	0.1	0.034	0.24
GOTERM_CC_DIRECT	COPI vesicle coat	8	0.1	0.034	0.24
GOTERM_CC_DIRECT	smooth endoplasmic reticulum	13	0.2	0.035	0.24
GOTERM_CC_DIRECT	cis-Golgi network	27	0.5	0.035	0.24
GOTERM_CC_DIRECT	NURF complex	6	0.1	0.036	0.24
GOTERM_CC_DIRECT	Bcl-2 family protein complex	6	0.1	0.036	0.24
GOTERM_CC_DIRECT	SMAD2-SMAD3 protein complex	6	0.1	0.036	0.24
GOTERM_CC_DIRECT	paraspeckles	6	0.1	0.036	0.24
GOTERM_CC_DIRECT	nonhomologous end joining complex	6	0.1	0.036	0.24
GOTERM_CC_DIRECT	aggresome	16	0.3	0.036	0.24
GOTERM_CC_DIRECT	late endosome membrane	48	0.8	0.037	0.24
GOTERM_CC_DIRECT	mitochondrial inner membrane	142	2.5	0.038	0.25
GOTERM_CC_DIRECT	Cajal body	29	0.5	0.039	0.25
GOTERM_CC_DIRECT	condensed chromosome, centromeric region	9	0.2	0.039	0.26
GOTERM_CC_DIRECT	bicellular tight junction	45	0.8	0.041	0.27
GOTERM_CC_DIRECT	endocytic vesicle membrane	27	0.5	0.042	0.27
GOTERM_CC_DIRECT	kinesin complex	21	0.4	0.042	0.27
GOTERM_CC_DIRECT	telomerase holoenzyme complex	11	0.2	0.045	0.28
GOTERM_CC_DIRECT	pericentriolar material	11	0.2	0.045	0.28
GOTERM_CC_DIRECT	apical part of cell	29	0.5	0.046	0.28
GOTERM_CC_DIRECT	desmosome	12	0.2	0.046	0.28
GOTERM_CC_DIRECT	spindle midzone	12	0.2	0.046	0.28
GOTERM_CC_DIRECT	rough endoplasmic reticulum membrane	7	0.1	0.046	0.28
GOTERM_CC_DIRECT	NSL complex	7	0.1	0.046	0.28
GOTERM_CC_DIRECT	vacuolar proton-transporting V-type ATPase, V1 domain	7	0.1	0.046	0.28
GOTERM_CC_DIRECT	Golgi trans cisterna	7	0.1	0.046	0.28
GOTERM_CC_DIRECT	zymogen granule membrane	7	0.1	0.046	0.28
GOTERM_CC_DIRECT	Golgi cisterna	7	0.1	0.046	0.28
GOTERM_CC_DIRECT	chaperonin-containing T-complex	7	0.1	0.046	0.28
GOTERM_CC_DIRECT	Golgi stack	16	0.3	0.046	0.28
GOTERM_CC_DIRECT	dendrite	140	2.5	0.046	0.28
GOTERM_CC_DIRECT	dendritic spine	56	1	0.046	0.28
GOTERM_CC_DIRECT	phagocytic cup	13	0.2	0.047	0.28
GOTERM_CC_DIRECT	myelin sheath abaxonal region	5	0.1	0.047	0.28
GOTERM_CC_DIRECT	annulate lamellae	5	0.1	0.047	0.28
GOTERM_CC_DIRECT	CRD-mediated mRNA stability complex	5	0.1	0.047	0.28
GOTERM_CC_DIRECT	condensed chromosome inner kinetochore	5	0.1	0.047	0.28
GOTERM_CC_DIRECT	ribosome	58	1	0.047	0.28
GOTERM_CC_DIRECT	septin complex	8	0.1	0.053	0.31
GOTERM_CC_DIRECT	preribosome, small subunit precursor	8	0.1	0.053	0.31
GOTERM_CC_DIRECT	cell division site	8	0.1	0.053	0.31
GOTERM_CC_DIRECT	septin ring	8	0.1	0.053	0.31
GOTERM_CC_DIRECT	cell projection	60	1.1	0.053	0.31
GOTERM_CC_DIRECT	nucleosome	47	0.8	0.054	0.31
GOTERM_CC_DIRECT	cytoplasmic vesicle membrane	44	0.8	0.055	0.31
GOTERM_CC_DIRECT	cortical actin cytoskeleton	23	0.4	0.057	0.32
GOTERM_CC_DIRECT	protein phosphatase type 2A complex	9	0.2	0.057	0.32
GOTERM_CC_DIRECT	perinuclear endoplasmic reticulum	9	0.2	0.057	0.32
GOTERM_CC_DIRECT	U2-type prespliceosome	9	0.2	0.057	0.32
GOTERM_CC_DIRECT	clathrin-coated vesicle membrane	15	0.3	0.059	0.33
GOTERM_CC_DIRECT	microtubule plus-end	11	0.2	0.061	0.33
GOTERM_CC_DIRECT	DNA-dependent protein kinase complex	4	0.1	0.061	0.33
GOTERM_CC_DIRECT	GAIT complex	4	0.1	0.061	0.33
GOTERM_CC_DIRECT	Rab-protein geranylgeranyltransferase complex	4	0.1	0.061	0.33
GOTERM_CC_DIRECT	X chromosome	4	0.1	0.061	0.33
GOTERM_CC_DIRECT	CHRAC	4	0.1	0.061	0.33
GOTERM_CC_DIRECT	BRCA1-B complex	4	0.1	0.061	0.33
GOTERM_CC_DIRECT	core mediator complex	12	0.2	0.061	0.33
GOTERM_CC_DIRECT	Smc5-Smc6 complex	6	0.1	0.063	0.34
GOTERM_CC_DIRECT	presynaptic active zone cytoplasmic component	6	0.1	0.063	0.34
GOTERM_CC_DIRECT	MOZ/MORF histone acetyltransferase complex	6	0.1	0.063	0.34
GOTERM_CC_DIRECT	cytoplasmic side of plasma membrane	23	0.4	0.067	0.36
GOTERM_CC_DIRECT	immunological synapse	18	0.3	0.068	0.36
GOTERM_CC_DIRECT	intermediate filament cytoskeleton	22	0.4	0.07	0.37
GOTERM_CC_DIRECT	exon-exon junction complex	7	0.1	0.072	0.38
GOTERM_CC_DIRECT	condensed chromosome outer kinetochore	7	0.1	0.072	0.38
GOTERM_CC_DIRECT	U2-type catalytic step 1 spliceosome	7	0.1	0.072	0.38
GOTERM_CC_DIRECT	extrinsic component of cytoplasmic side of plasma membrane	25	0.4	0.073	0.38
GOTERM_CC_DIRECT	Set1C/COMPASS complex	8	0.1	0.077	0.4
GOTERM_CC_DIRECT	U2-type catalytic step 2 spliceosome	13	0.2	0.078	0.4
GOTERM_CC_DIRECT	vesicle membrane	13	0.2	0.078	0.4
GOTERM_CC_DIRECT	rough endoplasmic reticulum	23	0.4	0.079	0.41
GOTERM_CC_DIRECT	NuA4 histone acetyltransferase complex	12	0.2	0.079	0.41
GOTERM_CC_DIRECT	exocyst	9	0.2	0.079	0.41
GOTERM_CC_DIRECT	intercellular bridge	32	0.6	0.081	0.41
GOTERM_CC_DIRECT	sarcolemma	36	0.6	0.086	0.43
GOTERM_CC_DIRECT	glycogen granule	5	0.1	0.087	0.43
GOTERM_CC_DIRECT	ELL-EAF complex	5	0.1	0.087	0.43
GOTERM_CC_DIRECT	Barr body	5	0.1	0.087	0.43
GOTERM_CC_DIRECT	eukaryotic translation initiation factor 3 complex, eIF3m	5	0.1	0.087	0.43
GOTERM_CC_DIRECT	activin receptor complex	5	0.1	0.087	0.43
GOTERM_CC_DIRECT	granular component	5	0.1	0.087	0.43
GOTERM_CC_DIRECT	nucleolus	390	6.9	0.087	0.43
GOTERM_CC_DIRECT	SNARE complex	19	0.3	0.093	0.46
GOTERM_CC_DIRECT	U2-type precatalytic spliceosome	19	0.3	0.093	0.46
GOTERM_CC_DIRECT	sarcoplasmic reticulum lumen	6	0.1	0.099	0.49
GOTERM_MF_DIRECT	RNA binding	701	12.4	1.3e-59	1.7e-56
GOTERM_MF_DIRECT	DNA binding	558	9.9	1.5e-32	1.3e-29
GOTERM_MF_DIRECT	chromatin binding	227	4	1.4e-20	8.9e-18
GOTERM_MF_DIRECT	cadherin binding	168	3	2.4e-20	1.3e-17
GOTERM_MF_DIRECT	enzyme binding	195	3.4	1.6e-19	7.1e-17
GOTERM_MF_DIRECT	ATP binding	594	10.5	3e-19	1.1e-16
GOTERM_MF_DIRECT	metal ion binding	936	16.5	1e-17	3.4e-15
GOTERM_MF_DIRECT	protein kinase binding	233	4.1	4.7e-17	1.4e-14
GOTERM_MF_DIRECT	transcription factor binding	112	2	4.7e-14	1.2e-11
GOTERM_MF_DIRECT	protein domain specific binding	133	2.3	6e-14	1.4e-11
GOTERM_MF_DIRECT	transcription cofactor activity	83	1.5	8.4e-14	1.8e-11
GOTERM_MF_DIRECT	ubiquitin protein ligase binding	147	2.6	3.7e-13	7.6e-11
GOTERM_MF_DIRECT	ATPase activity	161	2.8	4.4e-12	8.3e-10
GOTERM_MF_DIRECT	identical protein binding	612	10.8	5.3e-12	9.3e-10
GOTERM_MF_DIRECT	small GTPase binding	134	2.4	3.9e-11	6.4e-09
GOTERM_MF_DIRECT	protein serine/threonine kinase activity	172	3	7e-11	1.1e-08
GOTERM_MF_DIRECT	transcription coactivator activity	123	2.2	8.6e-11	1.3e-08
GOTERM_MF_DIRECT	transcription regulatory region sequence-specific DNA binding	115	2	1.3e-10	1.8e-08
GOTERM_MF_DIRECT	macromolecular complex binding	178	3.1	2.3e-10	2.9e-08
GOTERM_MF_DIRECT	protein C-terminus binding	103	1.8	2.3e-10	2.9e-08
GOTERM_MF_DIRECT	transcription corepressor activity	98	1.7	3.4e-10	4e-08
GOTERM_MF_DIRECT	ubiquitin-protein transferase activity	118	2.1	1.1e-09	1.3e-07
GOTERM_MF_DIRECT	transcription factor activity, sequence-specific DNA binding	222	3.9	2.8e-09	3.1e-07
GOTERM_MF_DIRECT	double-stranded RNA binding	47	0.8	2.9e-09	3.1e-07
GOTERM_MF_DIRECT	mRNA binding	112	2	9.3e-09	9.4e-07
GOTERM_MF_DIRECT	SMAD binding	35	0.6	1.6e-08	1.5e-06
GOTERM_MF_DIRECT	p53 binding	44	0.8	1.6e-08	1.5e-06
GOTERM_MF_DIRECT	RNA polymerase II sequence-specific DNA binding transcription factor binding	90	1.6	2.7e-08	2.5e-06
GOTERM_MF_DIRECT	RNA polymerase II core promoter proximal region sequence-specific DNA binding	426	7.5	7.7e-08	6.8e-06
GOTERM_MF_DIRECT	kinase activity	102	1.8	1.3e-07	1.1e-05
GOTERM_MF_DIRECT	promoter-specific chromatin binding	40	0.7	1.9e-07	1.6e-05
GOTERM_MF_DIRECT	phosphoprotein phosphatase activity	31	0.5	2.4e-07	1.9e-05
GOTERM_MF_DIRECT	transcriptional activator activity, RNA polymerase II transcription regulatory region sequence-specific binding	186	3.3	2.8e-07	2.1e-05
GOTERM_MF_DIRECT	protein N-terminus binding	60	1.1	2.8e-07	2.1e-05
GOTERM_MF_DIRECT	transcriptional repressor activity, RNA polymerase II transcription regulatory region sequence-specific binding	136	2.4	8e-07	5.8e-05
GOTERM_MF_DIRECT	histone deacetylase binding	65	1.1	8.2e-07	5.8e-05
GOTERM_MF_DIRECT	protein kinase activity	151	2.7	1.6e-06	0.00011
GOTERM_MF_DIRECT	protein homodimerization activity	260	4.6	2.1e-06	0.00014
GOTERM_MF_DIRECT	helicase activity	38	0.7	2.3e-06	0.00015
GOTERM_MF_DIRECT	actin binding	136	2.4	3.7e-06	0.00023
GOTERM_MF_DIRECT	chromatin DNA binding	44	0.8	6e-06	0.00038
GOTERM_MF_DIRECT	damaged DNA binding	39	0.7	7.7e-06	0.00047
GOTERM_MF_DIRECT	GDP binding	41	0.7	1.2e-05	0.00069
GOTERM_MF_DIRECT	nucleic acid binding	125	2.2	1.2e-05	0.0007
GOTERM_MF_DIRECT	sequence-specific DNA binding	130	2.3	1.2e-05	0.0007
GOTERM_MF_DIRECT	mitogen-activated protein kinase binding	21	0.4	1.5e-05	0.00086
GOTERM_MF_DIRECT	binding, bridging	44	0.8	1.9e-05	0.0011
GOTERM_MF_DIRECT	transcription coactivator binding	27	0.5	2.1e-05	0.0011
GOTERM_MF_DIRECT	ubiquitin binding	47	0.8	2.9e-05	0.0015
GOTERM_MF_DIRECT	tau protein binding	27	0.5	3.6e-05	0.0019
GOTERM_MF_DIRECT	transcription cofactor binding	24	0.4	3.7e-05	0.0019
GOTERM_MF_DIRECT	GTP binding	151	2.7	4.1e-05	0.0021
GOTERM_MF_DIRECT	protein serine/threonine phosphatase activity	33	0.6	4.3e-05	0.0021
GOTERM_MF_DIRECT	miRNA binding	23	0.4	4.4e-05	0.0021
GOTERM_MF_DIRECT	chaperone binding	52	0.9	4.8e-05	0.0022
GOTERM_MF_DIRECT	myosin phosphatase activity	39	0.7	5.7e-05	0.0027
GOTERM_MF_DIRECT	histone binding	79	1.4	8e-05	0.0036
GOTERM_MF_DIRECT	kinesin binding	28	0.5	8e-05	0.0036
GOTERM_MF_DIRECT	protein binding, bridging	49	0.9	9e-05	0.0039
GOTERM_MF_DIRECT	single-stranded DNA binding	53	0.9	9.2e-05	0.0039
GOTERM_MF_DIRECT	protein heterodimerization activity	140	2.5	9.3e-05	0.004
GOTERM_MF_DIRECT	protein phosphatase 2A binding	22	0.4	9.6e-05	0.004
GOTERM_MF_DIRECT	ligand-dependent nuclear receptor binding	27	0.5	9.9e-05	0.0041
GOTERM_MF_DIRECT	GTPase activity	133	2.3	0.00011	0.0046
GOTERM_MF_DIRECT	protein serine/threonine kinase activator activity	26	0.5	0.00012	0.0049
GOTERM_MF_DIRECT	MDM2/MDM4 family protein binding	11	0.2	0.00013	0.0049
GOTERM_MF_DIRECT	ubiquitin protein ligase activity	125	2.2	0.00014	0.0054
GOTERM_MF_DIRECT	I-SMAD binding	12	0.2	0.00014	0.0055
GOTERM_MF_DIRECT	ligand-dependent nuclear receptor transcription coactivator activity	31	0.5	0.00016	0.0058
GOTERM_MF_DIRECT	magnesium ion binding	93	1.6	0.00017	0.0064
GOTERM_MF_DIRECT	methylated histone binding	37	0.7	0.00018	0.0066
GOTERM_MF_DIRECT	nucleosome-dependent ATPase activity	21	0.4	0.00021	0.0074
GOTERM_MF_DIRECT	RNA polymerase II transcription factor activity, sequence-specific DNA binding	421	7.4	0.00021	0.0074
GOTERM_MF_DIRECT	zinc ion binding	296	5.2	0.00024	0.0084
GOTERM_MF_DIRECT	PDZ domain binding	43	0.8	0.00024	0.0084
GOTERM_MF_DIRECT	3'-5'-exoribonuclease activity	20	0.4	0.00025	0.0084
GOTERM_MF_DIRECT	14-3-3 protein binding	20	0.4	0.00025	0.0084
GOTERM_MF_DIRECT	ribonucleoprotein complex binding	21	0.4	0.00035	0.012
GOTERM_MF_DIRECT	protease binding	49	0.9	0.00036	0.012
GOTERM_MF_DIRECT	core promoter proximal region sequence-specific DNA binding	30	0.5	0.00042	0.014
GOTERM_MF_DIRECT	kinase binding	46	0.8	0.00051	0.016
GOTERM_MF_DIRECT	ubiquitin conjugating enzyme activity	21	0.4	0.00058	0.018
GOTERM_MF_DIRECT	protein serine/threonine/tyrosine kinase activity	18	0.3	0.00065	0.02
GOTERM_MF_DIRECT	RNA polymerase II core promoter sequence-specific DNA binding	14	0.2	0.00073	0.023
GOTERM_MF_DIRECT	cytoskeletal protein binding	30	0.5	0.00085	0.026
GOTERM_MF_DIRECT	beta-catenin binding	41	0.7	0.00086	0.026
GOTERM_MF_DIRECT	Hsp70 protein binding	25	0.4	0.00088	0.026
GOTERM_MF_DIRECT	disordered domain specific binding	21	0.4	0.00093	0.027
GOTERM_MF_DIRECT	histone acetyltransferase binding	16	0.3	0.00097	0.028
GOTERM_MF_DIRECT	bacterial-type RNA polymerase transcriptional repressor activity, sequence-specific DNA binding	9	0.2	0.0011	0.031
GOTERM_MF_DIRECT	pre-mRNA intronic binding	10	0.2	0.0011	0.032
GOTERM_MF_DIRECT	microtubule binding	100	1.8	0.0011	0.032
GOTERM_MF_DIRECT	lysine-acetylated histone binding	15	0.3	0.0012	0.033
GOTERM_MF_DIRECT	androgen receptor binding	17	0.3	0.0014	0.038
GOTERM_MF_DIRECT	microtubule plus-end binding	14	0.2	0.0014	0.039
GOTERM_MF_DIRECT	thiol-dependent ubiquitin-specific protease activity	50	0.9	0.0019	0.051
GOTERM_MF_DIRECT	insulin receptor binding	15	0.3	0.0021	0.056
GOTERM_MF_DIRECT	cyclin binding	19	0.3	0.0023	0.06
GOTERM_MF_DIRECT	pre-mRNA binding	11	0.2	0.0024	0.062
GOTERM_MF_DIRECT	tau-protein kinase activity	14	0.2	0.0026	0.067
GOTERM_MF_DIRECT	DNA helicase activity	29	0.5	0.0028	0.07
GOTERM_MF_DIRECT	phosphatase activity	29	0.5	0.0028	0.07
GOTERM_MF_DIRECT	DNA-dependent ATPase activity	21	0.4	0.0032	0.081
GOTERM_MF_DIRECT	protein dimerization activity	67	1.2	0.0036	0.089
GOTERM_MF_DIRECT	RNA helicase activity	34	0.6	0.0037	0.092
GOTERM_MF_DIRECT	core promoter sequence-specific DNA binding	12	0.2	0.0039	0.095
GOTERM_MF_DIRECT	RNA polymerase II transcription factor activity, ligand-activated sequence-specific DNA binding	26	0.5	0.0039	0.096
GOTERM_MF_DIRECT	RNA polymerase II regulatory region sequence-specific DNA binding	128	2.3	0.0041	0.098
GOTERM_MF_DIRECT	histone demethylase activity	14	0.2	0.0044	0.1
GOTERM_MF_DIRECT	translation factor activity, RNA binding	14	0.2	0.0044	0.1
GOTERM_MF_DIRECT	sequence-specific double-stranded DNA binding	187	3.3	0.0051	0.12
GOTERM_MF_DIRECT	glucose binding	10	0.2	0.0056	0.13
GOTERM_MF_DIRECT	histone demethylase activity (H3-K9 specific)	10	0.2	0.0056	0.13
GOTERM_MF_DIRECT	telomeric DNA binding	15	0.3	0.0056	0.13
GOTERM_MF_DIRECT	mRNA 5'-UTR binding	15	0.3	0.0056	0.13
GOTERM_MF_DIRECT	protein tyrosine phosphatase activity	44	0.8	0.0058	0.13
GOTERM_MF_DIRECT	unfolded protein binding	52	0.9	0.0061	0.14
GOTERM_MF_DIRECT	translation initiation factor activity	29	0.5	0.0063	0.14
GOTERM_MF_DIRECT	RNA polymerase binding	12	0.2	0.0068	0.15
GOTERM_MF_DIRECT	translation initiation factor binding	14	0.2	0.0071	0.15
GOTERM_MF_DIRECT	MAP kinase kinase kinase activity	14	0.2	0.0071	0.15
GOTERM_MF_DIRECT	virus receptor activity	33	0.6	0.0073	0.16
GOTERM_MF_DIRECT	Tat protein binding	8	0.1	0.0077	0.16
GOTERM_MF_DIRECT	1-phosphatidylinositol-3-kinase activity	8	0.1	0.0077	0.16
GOTERM_MF_DIRECT	TPR domain binding	7	0.1	0.0085	0.18
GOTERM_MF_DIRECT	chromo shadow domain binding	6	0.1	0.0085	0.18
GOTERM_MF_DIRECT	5'-deoxyribose-5-phosphate lyase activity	6	0.1	0.0085	0.18
GOTERM_MF_DIRECT	nuclear localization sequence binding	15	0.3	0.0087	0.18
GOTERM_MF_DIRECT	protein binding involved in protein folding	21	0.4	0.0089	0.18
GOTERM_MF_DIRECT	telomerase RNA binding	13	0.2	0.0089	0.18
GOTERM_MF_DIRECT	protein kinase inhibitor activity	18	0.3	0.0091	0.18
GOTERM_MF_DIRECT	integrin binding	61	1.1	0.0093	0.18
GOTERM_MF_DIRECT	ADP binding	19	0.3	0.01	0.2
GOTERM_MF_DIRECT	dioxygenase activity	19	0.3	0.01	0.2
GOTERM_MF_DIRECT	protein kinase A regulatory subunit binding	14	0.2	0.011	0.21
GOTERM_MF_DIRECT	poly(U) RNA binding	14	0.2	0.011	0.21
GOTERM_MF_DIRECT	guanyl-nucleotide exchange factor activity	84	1.5	0.011	0.21
GOTERM_MF_DIRECT	double-stranded DNA binding	46	0.8	0.012	0.23
GOTERM_MF_DIRECT	ubiquitin-ubiquitin ligase activity	9	0.2	0.013	0.24
GOTERM_MF_DIRECT	retinoic acid receptor binding	9	0.2	0.013	0.24
GOTERM_MF_DIRECT	cadherin binding involved in cell-cell adhesion	11	0.2	0.014	0.26
GOTERM_MF_DIRECT	retinoid X receptor binding	11	0.2	0.014	0.26
GOTERM_MF_DIRECT	GTPase activating protein binding	11	0.2	0.014	0.26
GOTERM_MF_DIRECT	thyroid hormone receptor binding	16	0.3	0.015	0.26
GOTERM_MF_DIRECT	transcription corepressor binding	21	0.4	0.016	0.29
GOTERM_MF_DIRECT	heat shock protein binding	29	0.5	0.016	0.29
GOTERM_MF_DIRECT	manganese ion binding	29	0.5	0.016	0.29
GOTERM_MF_DIRECT	growth factor binding	18	0.3	0.018	0.31
GOTERM_MF_DIRECT	histone methyltransferase activity (H3-K4 specific)	12	0.2	0.018	0.31
GOTERM_MF_DIRECT	single-stranded DNA-dependent ATP-dependent DNA helicase activity	12	0.2	0.018	0.31
GOTERM_MF_DIRECT	bacterial-type RNA polymerase transcriptional activator activity, sequence-specific DNA binding	10	0.2	0.018	0.31
GOTERM_MF_DIRECT	insulin-like growth factor receptor binding	10	0.2	0.018	0.31
GOTERM_MF_DIRECT	structural constituent of nuclear pore	15	0.3	0.018	0.32
GOTERM_MF_DIRECT	phosphatidylinositol-3,4-bisphosphate 5-kinase activity	7	0.1	0.019	0.32
GOTERM_MF_DIRECT	ubiquitin ligase inhibitor activity	7	0.1	0.019	0.32
GOTERM_MF_DIRECT	primary miRNA binding	7	0.1	0.019	0.32
GOTERM_MF_DIRECT	phosphatidylinositol binding	42	0.7	0.02	0.33
GOTERM_MF_DIRECT	histone acetyltransferase activity	16	0.3	0.02	0.33
GOTERM_MF_DIRECT	protein phosphatase 1 binding	16	0.3	0.02	0.33
GOTERM_MF_DIRECT	tRNA binding	31	0.5	0.02	0.33
GOTERM_MF_DIRECT	K63-linked polyubiquitin binding	13	0.2	0.021	0.33
GOTERM_MF_DIRECT	poly(A) binding	13	0.2	0.021	0.33
GOTERM_MF_DIRECT	dynein complex binding	13	0.2	0.021	0.33
GOTERM_MF_DIRECT	R-SMAD binding	13	0.2	0.021	0.33
GOTERM_MF_DIRECT	ubiquitin-protein transferase activator activity	6	0.1	0.023	0.36
GOTERM_MF_DIRECT	SUMO-specific protease activity	6	0.1	0.023	0.36
GOTERM_MF_DIRECT	peptide-lysine-N-acetyltransferase activity	6	0.1	0.023	0.36
GOTERM_MF_DIRECT	sterol transporter activity	9	0.2	0.023	0.36
GOTERM_MF_DIRECT	actin filament binding	79	1.4	0.024	0.37
GOTERM_MF_DIRECT	ion channel binding	52	0.9	0.024	0.37
GOTERM_MF_DIRECT	rRNA binding	19	0.3	0.025	0.38
GOTERM_MF_DIRECT	protein tyrosine kinase activity	43	0.8	0.027	0.42
GOTERM_MF_DIRECT	polyubiquitin binding	16	0.3	0.028	0.42
GOTERM_MF_DIRECT	NF-kappaB binding	16	0.3	0.028	0.42
GOTERM_MF_DIRECT	lamin binding	10	0.2	0.029	0.42
GOTERM_MF_DIRECT	myosin V binding	10	0.2	0.029	0.42
GOTERM_MF_DIRECT	insulin receptor substrate binding	8	0.1	0.029	0.42
GOTERM_MF_DIRECT	vinculin binding	8	0.1	0.029	0.42
GOTERM_MF_DIRECT	histone methyltransferase binding	8	0.1	0.029	0.42
GOTERM_MF_DIRECT	phosphatidylinositol kinase activity	8	0.1	0.029	0.42
GOTERM_MF_DIRECT	receptor tyrosine kinase binding	27	0.5	0.03	0.43
GOTERM_MF_DIRECT	calmodulin binding	72	1.3	0.031	0.44
GOTERM_MF_DIRECT	histone-lysine N-methyltransferase activity	14	0.2	0.033	0.47
GOTERM_MF_DIRECT	estrogen receptor binding	20	0.4	0.033	0.47
GOTERM_MF_DIRECT	protein phosphatase binding	36	0.6	0.034	0.49
GOTERM_MF_DIRECT	receptor signaling complex scaffold activity	16	0.3	0.037	0.5
GOTERM_MF_DIRECT	cyclin-dependent protein serine/threonine kinase regulator activity	16	0.3	0.037	0.5
GOTERM_MF_DIRECT	TFIID-class transcription factor binding	7	0.1	0.037	0.5
GOTERM_MF_DIRECT	N6-methyladenosine-containing RNA binding	7	0.1	0.037	0.5
GOTERM_MF_DIRECT	AP-2 adaptor complex binding	7	0.1	0.037	0.5
GOTERM_MF_DIRECT	eukaryotic initiation factor 4E binding	7	0.1	0.037	0.5
GOTERM_MF_DIRECT	protein tyrosine/threonine phosphatase activity	7	0.1	0.037	0.5
GOTERM_MF_DIRECT	transmembrane receptor protein serine/threonine kinase activity	7	0.1	0.037	0.5
GOTERM_MF_DIRECT	vitamin D receptor binding	9	0.2	0.037	0.5
GOTERM_MF_DIRECT	activin binding	9	0.2	0.037	0.5
GOTERM_MF_DIRECT	phosphatidylinositol 3-kinase binding	12	0.2	0.038	0.51
GOTERM_MF_DIRECT	GTPase binding	17	0.3	0.038	0.51
GOTERM_MF_DIRECT	protein phosphatase regulator activity	17	0.3	0.038	0.51
GOTERM_MF_DIRECT	transferase activity	60	1.1	0.039	0.51
GOTERM_MF_DIRECT	nucleosomal DNA binding	18	0.3	0.04	0.52
GOTERM_MF_DIRECT	NAD binding	18	0.3	0.04	0.52
GOTERM_MF_DIRECT	tubulin binding	26	0.5	0.043	0.56
GOTERM_MF_DIRECT	L-glutamine transmembrane transporter activity	6	0.1	0.047	0.59
GOTERM_MF_DIRECT	DEAD/H-box RNA helicase binding	6	0.1	0.047	0.59
GOTERM_MF_DIRECT	pre-miRNA binding	6	0.1	0.047	0.59
GOTERM_MF_DIRECT	glutathione S-conjugate-exporting ATPase activity	6	0.1	0.047	0.59
GOTERM_MF_DIRECT	retinal dehydrogenase activity	6	0.1	0.047	0.59
GOTERM_MF_DIRECT	MAP kinase tyrosine/serine/threonine phosphatase activity	8	0.1	0.048	0.6
GOTERM_MF_DIRECT	mitogen-activated protein kinase kinase binding	8	0.1	0.048	0.6
GOTERM_MF_DIRECT	poly(A)-specific ribonuclease activity	8	0.1	0.048	0.6
GOTERM_MF_DIRECT	sterol binding	11	0.2	0.048	0.6
GOTERM_MF_DIRECT	phosphoprotein binding	17	0.3	0.049	0.61
GOTERM_MF_DIRECT	extracellular matrix structural constituent conferring tensile strength	18	0.3	0.05	0.62
GOTERM_MF_DIRECT	Hsp90 protein binding	19	0.3	0.051	0.63
GOTERM_MF_DIRECT	hydrolase activity	91	1.6	0.052	0.63
GOTERM_MF_DIRECT	ferrous iron transmembrane transporter activity	5	0.1	0.059	0.71
GOTERM_MF_DIRECT	U2 snRNA binding	5	0.1	0.059	0.71
GOTERM_MF_DIRECT	hydrogen ion transmembrane transporter activity	15	0.3	0.06	0.72
GOTERM_MF_DIRECT	signaling adaptor activity	16	0.3	0.061	0.72
GOTERM_MF_DIRECT	adenyl-nucleotide exchange factor activity	7	0.1	0.062	0.72
GOTERM_MF_DIRECT	MAP-kinase scaffold activity	7	0.1	0.062	0.72
GOTERM_MF_DIRECT	SUMO binding	7	0.1	0.062	0.72
GOTERM_MF_DIRECT	ubiquitinyl hydrolase activity	7	0.1	0.062	0.72
GOTERM_MF_DIRECT	histone methyltransferase activity (H3-K36 specific)	7	0.1	0.062	0.72
GOTERM_MF_DIRECT	dystroglycan binding	7	0.1	0.062	0.72
GOTERM_MF_DIRECT	mannosyltransferase activity	10	0.2	0.062	0.72
GOTERM_MF_DIRECT	endonuclease activity	22	0.4	0.063	0.73
GOTERM_MF_DIRECT	low-density lipoprotein particle receptor binding	12	0.2	0.07	0.8
GOTERM_MF_DIRECT	nuclease activity	12	0.2	0.07	0.8
GOTERM_MF_DIRECT	angiostatin binding	4	0.1	0.072	0.81
GOTERM_MF_DIRECT	RING-like zinc finger domain binding	4	0.1	0.072	0.81
GOTERM_MF_DIRECT	serine transmembrane transporter activity	4	0.1	0.072	0.81
GOTERM_MF_DIRECT	epidermal growth factor binding	4	0.1	0.072	0.81
GOTERM_MF_DIRECT	uracil DNA N-glycosylase activity	4	0.1	0.072	0.81
GOTERM_MF_DIRECT	dATP binding	4	0.1	0.072	0.81
GOTERM_MF_DIRECT	ATPase activator activity	13	0.2	0.073	0.81
GOTERM_MF_DIRECT	E-box binding	20	0.4	0.077	0.85
GOTERM_MF_DIRECT	phosphatidylinositol-3,4,5-trisphosphate binding	17	0.3	0.077	0.85
GOTERM_MF_DIRECT	ATP-dependent microtubule motor activity, plus-end-directed	9	0.2	0.08	0.87
GOTERM_MF_DIRECT	glycogen binding	6	0.1	0.081	0.87
GOTERM_MF_DIRECT	nitric-oxide synthase regulator activity	6	0.1	0.081	0.87
GOTERM_MF_DIRECT	clathrin heavy chain binding	6	0.1	0.081	0.87
GOTERM_MF_DIRECT	L-serine transmembrane transporter activity	6	0.1	0.081	0.87
GOTERM_MF_DIRECT	phosphatase activator activity	6	0.1	0.081	0.87
GOTERM_MF_DIRECT	transforming growth factor beta-activated receptor activity	6	0.1	0.081	0.87
GOTERM_MF_DIRECT	protein self-association	28	0.5	0.082	0.87
GOTERM_MF_DIRECT	ribosome binding	27	0.5	0.084	0.89
GOTERM_MF_DIRECT	nuclear import signal receptor activity	10	0.2	0.085	0.9
GOTERM_MF_DIRECT	protein-cysteine S-palmitoyltransferase activity	12	0.2	0.092	0.96
GOTERM_MF_DIRECT	myosin binding	12	0.2	0.092	0.96
GOTERM_MF_DIRECT	antiporter activity	14	0.2	0.094	0.96
GOTERM_MF_DIRECT	gamma-tubulin binding	15	0.3	0.095	0.96
GOTERM_MF_DIRECT	ion transmembrane transporter activity	7	0.1	0.095	0.96
GOTERM_MF_DIRECT	RNA polymerase II carboxy-terminal domain kinase activity	7	0.1	0.095	0.96
GOTERM_MF_DIRECT	co-SMAD binding	7	0.1	0.095	0.96
GOTERM_MF_DIRECT	5'-3' exonuclease activity	7	0.1	0.095	0.96
GOTERM_MF_DIRECT	RNA cap binding	7	0.1	0.095	0.96
GOTERM_MF_DIRECT	dynactin binding	7	0.1	0.095	0.96

## Sheet: Sheet2
	Category	Term	Genes Count	GeneRatio	P-Value	Benjamini
