# Supplementary material for: Identification of Differentially Expressed miRNAs in Porcine Adipose Tissues and Evaluation of Their Effects on Feed Efficiency
Source: Genes (Basel). 2022 Dec 19;13(12):2406. doi: 10.3390/genes13122406 (PMC9778086; doi:10.3390/genes13122406)
Supplement: Supplementary file 1 [file genes-13-02406-s001.zip › Table S5 KEGG pathways significantly related with genes targeted by DE miRNAs between adipose tissues from high and low FE Yorkshire pigs.xls]

## Sheet: Sheet1
Title
Identification of differentially expressed miRNAs in porcine adipose tissues and evaluation of their effects on feed efficiency
Authors
Mingxing Liao, Zhuqing Ren*, Yuanxin miao *
* the corresponding author
Table S5 KEGG pathways significantly related with genes targeted by DE miRNAs between adipose from high and low FE Yorkshire pigs
KEGG pathway	Counts of Target Genes gene	Counts of miRNA	p value
Proteoglycans in cancer	106	12	2.75935e-13
Hippo signaling pathway	83	12	1.80172e-10
TGF-beta signaling pathway	50	12	2.37306e-09
Prion diseases	13	10	7.24177e-07
Chronic myeloid leukemia	47	12	7.24177e-07
Colorectal cancer	40	12	2.00293e-06
FoxO signaling pathway	76	12	3.32888e-06
AMPK signaling pathway	73	11	3.61532e-06
Lysine degradation	28	12	3.61532e-06
Cell cycle	71	12	4.55759e-06
Hepatitis B	71	12	4.96576e-06
Ubiquitin mediated proteolysis	77	12	5.38758e-06
Viral carcinogenesis	91	12	7.27938e-06
Pancreatic cancer	41	12	9.74725e-06
Signaling pathways regulating pluripotency of stem cells	71	11	1.61046e-05
p53 signaling pathway	43	11	1.67343e-05
Insulin signaling pathway	78	12	2.40756e-05
ECM-receptor interaction	36	12	3.63333e-05
Central carbon metabolism in cancer	37	12	5.05422e-05
RNA degradation	48	12	5.33837e-05
Adherens junction	42	12	5.33837e-05
Renal cell carcinoma	39	12	0.000129783
Protein processing in endoplasmic reticulum	83	12	0.000153611
Pathways in cancer	176	12	0.000173403
Non-small cell lung cancer	31	10	0.000307963
Focal adhesion	101	12	0.000802932
Transcriptional misregulation in cancer	80	11	0.000811038
Endometrial cancer	30	10	0.00111876
Small cell lung cancer	47	12	0.0014551
Neurotrophin signaling pathway	61	12	0.00151026
mRNA surveillance pathway	47	12	0.00160681
Prostate cancer	49	12	0.00160681
RNA transport	83	12	0.00302623
Bladder cancer	24	11	0.00389158
HTLV-I infection	118	12	0.00389158
Bacterial invasion of epithelial cells	41	12	0.00394279
Thyroid hormone signaling pathway	60	12	0.00414394
Glioma	33	10	0.00441058
Prolactin signaling pathway	36	11	0.00562173
Spliceosome	63	12	0.00670139
Sphingolipid signaling pathway	55	11	0.0074607
mTOR signaling pathway	33	11	0.00987789
Arrhythmogenic right ventricular cardiomyopathy (ARVC)	28	11	0.00987789
HIF-1 signaling pathway	53	11	0.011444
Apoptosis	44	11	0.0135039
Endocytosis	91	12	0.0145119
Melanoma	34	12	0.0145119
Steroid biosynthesis	10	8	0.0241181
TNF signaling pathway	51	10	0.0242837
Acute myeloid leukemia	28	10	0.0262015
Adipocytokine signaling pathway	34	10	0.026356
ErbB signaling pathway	43	11	0.0281824
Wnt signaling pathway	60	11	0.0415569
Glycosaminoglycan biosynthesis - chondroitin sulfate / dermatan sulfate	10	7	0.0445223
Regulation of actin cytoskeleton	91	12	0.0451268
Non-alcoholic fatty liver disease (NAFLD)	66	11	0.0465034
Chagas disease (American trypanosomiasis)	48	12	0.0490943

## Sheet: Sheet2
KEGG pathway	#genes	#miRNAs	p-value
