# Supplementary material for: Identification of Differentially Expressed miRNAs in Porcine Adipose Tissues and Evaluation of Their Effects on Feed Efficiency
Source: Genes (Basel). 2022 Dec 19;13(12):2406. doi: 10.3390/genes13122406 (PMC9778086; doi:10.3390/genes13122406)
Supplement: Supplementary file 1 [file genes-13-02406-s001.zip › Table S6 List of adipose tissues DEGs between Yorkshire pigs with high (n=3) and low FE (n=3).xls]

## Sheet: Table S5
Title
Identification of differentially expressed miRNAs in porcine adipose tissues and evaluation of their effects on feed efficiency
Authors
Mingxing Liao, Zhuqing Ren*, Yuanxin miao *
* the corresponding author
Table S6 List of adupose tissues DEGs between Yorkshire pigs with high (n=3) and low FCR (n=3)
geneID	symbol	log2FoldChange	baseMean	lfcSE	stat	pvalue
ENSSSCG00000001458	HLA-DRB1	4.90892	5.33569	1.78569	-2.74903	0.00597716
ENSSSCG00000016972	CARTPT	4.7579	2.37829	2.17383	-2.18871	0.0286176
ENSSSCG00000012147	S100G	4.01955	8.47557	1.38905	-2.89374	0.00380683
ENSSSCG00000022894	GZMH	3.89343	2.73337	1.83505	-2.1217	0.0338629
ENSSSCG00000022644	HIST2H2BF	3.75559	11.9782	1.1392	-3.29668	0.000978359
ENSSSCG00000021720	SFMBT2	3.27538	4.82544	1.38048	-2.37263	0.0176619
ENSSSCG00000030810	APCS	2.74638	11.5823	1.16735	-2.35267	0.018639
ENSSSCG00000000418	TAC3	2.60753	9.50674	1.24783	-2.08966	0.0366484
ENSSSCG00000024558	USP10	2.5244	5.61653	1.2375	-2.03992	0.0413578
ENSSSCG00000023138	CYP3A5	2.3736	38.1616	0.792538	-2.99494	0.00274502
ENSSSCG00000007726	AUTS2	2.1968	6.13201	1.10209	-1.9933	0.0462283
ENSSSCG00000021395	CYP3A5	2.17254	9.69898	1.04983	-2.06941	0.0385074
ENSSSCG00000012632	ZCCHC12	2.08436	8.06908	1.06066	-1.96514	0.0493976
ENSSSCG00000011727	PTX3	2.02714	567.998	0.539699	-3.75605	0.000172616
ENSSSCG00000010445	ANKRD22	1.97499	7.59105	1.00472	-1.96571	0.0493317
ENSSSCG00000029449	PRG4	1.70311	28.4352	0.808077	-2.10761	0.0350645
ENSSSCG00000027091	OAZ3	1.65283	44.3593	0.686885	-2.40627	0.0161165
ENSSSCG00000001203	ZSCAN9	1.59883	17.4686	0.726392	-2.20106	0.0277318
ENSSSCG00000024447	THRSP	1.57142	237.164	0.573311	-2.74096	0.00612591
ENSSSCG00000009882	OAS1	1.56988	1014.08	0.673912	-2.3295	0.0198327
ENSSSCG00000004822	ALDH1A3	1.55868	25.4694	0.63101	-2.47014	0.013506
ENSSSCG00000021852	FAM124B	1.53229	22.0483	0.661245	-2.31728	0.0204882
ENSSSCG00000023489	CXCL9	1.50183	105.493	0.583207	-2.57512	0.0100205
ENSSSCG00000014570	NRIP3	1.43723	1722.17	0.643957	-2.23187	0.0256237
ENSSSCG00000024899	RFLNB	1.37623	840.355	0.438084	-3.14147	0.001681
ENSSSCG00000014326	KIF20A	1.35221	121.069	0.543591	-2.48754	0.012863
ENSSSCG00000023745	MCOLN3	1.33889	19.3111	0.673635	-1.98755	0.046861
ENSSSCG00000029360	AL139300.1	1.32261	124.004	0.476541	-2.77545	0.00551262
ENSSSCG00000011216	LRRC3B	1.2471	33.7495	0.612415	-2.03636	0.0417144
ENSSSCG00000016342	HES6	1.21242	228.032	0.570983	-2.12339	0.0337213
ENSSSCG00000029346	DHTKD1	1.18522	74.7622	0.513494	-2.30815	0.0209905
ENSSSCG00000026302	MKI67	1.15531	181.456	0.539023	-2.14334	0.0320856
ENSSSCG00000007903	CPXM2	1.04689	207.33	0.487587	-2.14709	0.0317863
ENSSSCG00000015545	GLUL	1.02738	35904.7	0.516774	-1.98807	0.0468041
ENSSSCG00000022484	CH242-228L8.2	-1.00125	585.561	0.472639	2.11843	0.0341385
ENSSSCG00000029395	TMEM25	-1.04295	389.69	0.408985	2.55008	0.0107698
ENSSSCG00000007665	IRS3P	-1.08242	115.625	0.458227	2.36219	0.0181671
ENSSSCG00000025005	B4GALT6	-1.09041	101.583	0.544481	2.00266	0.0452143
ENSSSCG00000027992	MST1R	-1.10368	404.116	0.523045	2.1101	0.0348494
ENSSSCG00000014034	N4BP3	-1.13643	1012.81	0.507839	2.23778	0.0252352
ENSSSCG00000017141	AATK	-1.13917	92.2938	0.520693	2.18779	0.028685
ENSSSCG00000011701	TM4SF18	-1.1482	35.3326	0.556917	2.06171	0.0392353
ENSSSCG00000014871	TSKU	-1.15021	185.817	0.567993	2.02504	0.0428636
ENSSSCG00000022314	CLIC4	-1.16269	131.799	0.592365	1.9628	0.0496699
ENSSSCG00000013303	ABTB2	-1.16882	39.8288	0.579732	2.01613	0.043786
ENSSSCG00000003371	GPR153	-1.19094	86.3036	0.568115	2.0963	0.0360559
ENSSSCG00000016689	TRIL	-1.20389	133.604	0.498635	2.41436	0.0157628
ENSSSCG00000024919	RDH16	-1.21164	487.581	0.529185	2.28964	0.0220422
ENSSSCG00000024351	MET	-1.21657	74.4398	0.588735	2.06641	0.0387894
ENSSSCG00000006492	BGLAP	-1.22114	61.2607	0.55916	2.18388	0.028971
ENSSSCG00000016638	MDFIC	-1.24686	373.132	0.573417	2.17444	0.0296723
ENSSSCG00000002456	CHGA	-1.2815	531.359	0.60474	2.11909	0.0340827
ENSSSCG00000014194	PJA2	-1.28837	112.291	0.647467	1.98987	0.0466056
ENSSSCG00000029200	TRIM2	-1.29165	116.406	0.637041	2.02759	0.0426025
ENSSSCG00000016403	VIPR2	-1.29308	54.7202	0.530623	2.4369	0.0148136
ENSSSCG00000016933	ELOVL7	-1.32544	140.626	0.653211	2.02911	0.0424466
ENSSSCG00000001076	RNF144B	-1.34342	53.5557	0.577865	2.3248	0.0200827
ENSSSCG00000008448	PREPL	-1.34424	222.229	0.625453	2.14922	0.0316168
ENSSSCG00000006636	GABPB2	-1.35191	29.2391	0.627509	2.15441	0.0312083
ENSSSCG00000010728	CPXM2	-1.35608	394.965	0.588419	2.30461	0.0211885
ENSSSCG00000024358	GAS2L2	-1.37255	25.5816	0.686443	1.99951	0.0455529
ENSSSCG00000012754	GABRE	-1.37779	63.4812	0.566459	2.43228	0.0150042
ENSSSCG00000001485	MLIP	-1.3929	29.3493	0.620791	2.24376	0.0248481
ENSSSCG00000008833	SGCB	-1.39324	445.728	0.628104	2.21817	0.0265435
ENSSSCG00000029805	RHOBTB3	-1.39435	186.066	0.627566	2.22183	0.0262945
ENSSSCG00000011848	TFRC	-1.39657	181.149	0.661816	2.11021	0.0348403
ENSSSCG00000012001	ROBO1	-1.41589	98.6781	0.665974	2.12605	0.0334992
ENSSSCG00000018056	SRCIN1	-1.41628	49.4961	0.593208	2.3875	0.0169635
ENSSSCG00000005905	SLC39A4	-1.45255	71.1186	0.629726	2.30664	0.0210746
ENSSSCG00000002864	SLC7A10	-1.50559	85.5195	0.489408	3.07635	0.00209549
ENSSSCG00000016823	C1QTNF3	-1.51369	118.028	0.583545	2.59396	0.00948774
ENSSSCG00000012780	PLXNB3	-1.55045	29.4724	0.717621	2.16054	0.0307312
ENSSSCG00000007978	HBA2	-1.58206	671.735	0.632504	2.50127	0.0123749
ENSSSCG00000012427	RPL9P7	-1.59452	387.388	0.678857	2.34883	0.0188325
ENSSSCG00000026780	EDIL3	-1.60942	32.8456	0.769509	2.09149	0.0364839
ENSSSCG00000028776	HILS1	-1.63417	13.9611	0.776333	2.10498	0.0352932
ENSSSCG00000019556	7SK	-1.67177	151.734	0.579626	2.88421	0.00392394
ENSSSCG00000013230	FAM180B	-1.68236	101.34	0.620161	2.71278	0.00667218
ENSSSCG00000030549	CLSTN1	-1.68871	12.9362	0.841703	2.0063	0.0448247
ENSSSCG00000002637	DBNDD1	-1.70326	16.4027	0.868817	1.96043	0.0499453
ENSSSCG00000015522	ANGPTL1	-1.72536	248.703	0.59081	2.92032	0.00349667
ENSSSCG00000020785	DES	-1.73556	531.825	0.779679	2.226	0.0260145
ENSSSCG00000011287	HHATL	-1.78124	11.1482	0.902425	1.97384	0.0483997
ENSSSCG00000012527	TCEAL9	-1.81448	10.6429	0.925727	1.96006	0.0499886
ENSSSCG00000015617	G0S2	-1.82106	267.548	0.584853	3.11371	0.00184753
ENSSSCG00000009077	HSPA4L	-1.83164	12.2013	0.891231	2.05518	0.0398614
ENSSSCG00000000439	KIF5A	-1.8659	39.6991	0.886253	2.10538	0.0352582
ENSSSCG00000014117	THBS4	-1.87931	121.706	0.616138	3.05014	0.00228735
ENSSSCG00000005385	NR4A3	-1.88128	89.3829	0.756731	2.48606	0.0129167
ENSSSCG00000009724	ANHX	-1.88198	9.58267	0.915446	2.05581	0.0398013
ENSSSCG00000000781	ABCD2	-1.88233	71.5751	0.620802	3.03209	0.00242867
ENSSSCG00000003722	CDH2	-1.8923	17.2781	0.96336	1.96427	0.0494992
ENSSSCG00000001473	COL11A2	-1.89743	23.0484	0.800042	2.37167	0.0177079
ENSSSCG00000000922	KITLG	-1.89959	16.5694	0.80936	2.34702	0.018924
ENSSSCG00000001715	ENPP5	-1.91451	23.2618	0.917253	2.08722	0.0368686
ENSSSCG00000020953	ATP1A4	-1.92929	15.461	0.949468	2.03197	0.0421565
ENSSSCG00000030018	ZNF396	-1.93101	9.70372	0.917327	2.10504	0.0352879
ENSSSCG00000000917	KERA	-1.93807	70.2289	0.753933	2.57062	0.0101517
ENSSSCG00000027712	TUBA8	-1.95242	9.90468	0.917325	2.12838	0.0333056
ENSSSCG00000030767	TMP-SLA-5	-1.95769	217.255	0.781365	2.50548	0.0122285
ENSSSCG00000008948	ALB	-1.95815	31.159	0.722799	2.70912	0.00674618
ENSSSCG00000014118	THBS4	-2.03526	237.351	0.668871	3.04284	0.00234359
ENSSSCG00000016869	CEP57	-2.06856	7.7676	1.05327	1.96395	0.0495361
ENSSSCG00000023859	LRRTM1	-2.12893	22.8673	0.952793	2.23441	0.0254563
ENSSSCG00000011673	TSPAN6	-2.12915	98.2736	0.713138	2.9856	0.0028302
ENSSSCG00000023934	KCNIP4	-2.1456	15.5251	1.05998	2.02419	0.0429507
ENSSSCG00000020439	RNaseP_nuc	-2.19557	46.3869	0.64095	3.42549	0.000613697
ENSSSCG00000000717	KCNA6	-2.22352	14.3301	0.999225	2.22525	0.0260646
ENSSSCG00000016483	PRSS3P2	-2.23497	14.45	1.0067	2.22009	0.0264128
ENSSSCG00000026816	PTPN6	-2.26929	11.7988	1.09559	2.07129	0.0383317
ENSSSCG00000009332	TEX26	-2.30172	27.6192	0.799033	2.88063	0.00396881
ENSSSCG00000024853	ssc-mir-4332	-2.30587	802.79	0.589561	3.91117	9.18501e-05
ENSSSCG00000005391	TMEFF1	-2.31252	14.0676	1.0685	2.16426	0.0304442
ENSSSCG00000005445	FRRS1L	-2.35862	25.8438	0.688861	3.42394	0.000617199
ENSSSCG00000001248	MOG	-2.37744	19.0348	1.07296	2.21578	0.0267063
ENSSSCG00000015612	IRF6	-2.41172	8.39191	1.13095	2.13247	0.0329681
ENSSSCG00000025353	TNNT1	-2.4202	14.0153	1.13136	2.1392	0.0324194
ENSSSCG00000015404	SEMA3C	-2.42678	26.5867	0.751601	3.22881	0.00124306
ENSSSCG00000025489	CLSTN3	-2.48049	7.89423	1.1504	2.1562	0.0310677
ENSSSCG00000023806	LRRN1	-2.57547	12.8169	1.19674	2.15207	0.031392
ENSSSCG00000024699	Metazoa_SRP	-2.66015	14.7785	0.904086	2.94237	0.00325712
ENSSSCG00000000873	ANO4	-2.67373	7.3871	1.29058	2.07173	0.0382906
ENSSSCG00000015870	KCNJ3	-2.71631	10.2154	1.24285	2.18556	0.0288477
ENSSSCG00000004803	ACTC1	-2.73784	9.14697	1.16491	2.35025	0.0187607
ENSSSCG00000012480	TNMD	-2.78712	18.4449	1.0357	2.69104	0.00712299
ENSSSCG00000006069	RGS22	-2.91686	12.8836	0.936069	3.11608	0.00183274
ENSSSCG00000017307	MYL4	-2.9834	15.0442	1.24997	2.38678	0.0169965
ENSSSCG00000018700	RNase_MRP	-3.02468	9.20437	1.13879	2.65604	0.00790633
ENSSSCG00000030271	GSTO2	-3.06494	9.62503	1.19039	2.57474	0.0100316
ENSSSCG00000024520	ABCB4	-3.13988	4.99716	1.35178	2.32277	0.0201914
ENSSSCG00000027643	DIO2	-3.14986	6.64512	1.34148	2.34804	0.0188726
ENSSSCG00000029839	Metazoa_SRP	-3.16435	21.8052	0.883365	3.58215	0.000340778
ENSSSCG00000004614	UNC13C	-3.34475	5.56011	1.56295	2.14002	0.0323532
ENSSSCG00000027401	OPRD1	-3.72412	2.56332	1.88145	1.97939	0.0477724
ENSSSCG00000017026	GABRA1	-3.74428	7.23479	1.54562	2.42251	0.0154137
ENSSSCG00000022483	GPBAR1	-3.8399	2.79034	1.89827	2.02284	0.0430895
ENSSSCG00000014448	ARSI	-4.18254	3.45484	1.72063	2.43082	0.0150647
ENSSSCG00000011574	ATP2B2	-4.24893	3.58594	1.83158	2.31982	0.0203506
ENSSSCG00000026668	HIST1H2BN	-4.25982	1.77208	2.15296	1.97859	0.0478626
ENSSSCG00000029563	PTER	-4.30905	1.83942	2.14527	2.00863	0.0445762
ENSSSCG00000014008	SCGB3A1	-4.43424	2.00926	2.03849	2.17526	0.0296109
ENSSSCG00000025879	SCRT1	-4.65548	8.90641	1.55474	2.99438	0.00275004
ENSSSCG00000014978	ANGPTL5	-5.09551	3.1834	1.98771	2.56351	0.0103621
ENSSSCG00000028079	RPL15	-6.9339	11.3346	1.50486	4.60768	4.07181e-06
ENSSSCG00000021356	-	-1.97824	3024.57	0.586141	3.37502	0.000738104
ENSSSCG00000025162	-	-2.11614	6252.36	0.591219	3.57928	0.000344546
ENSSSCG00000019430	-	-4.70614	2.42099	2.14067	2.19844	0.0279176
